# Supplementary material
Source: PubMed Central journal article supplement (PMC4179246)
Supplement: NIHMS591244-supplement-SupportFiles.pdf [file NIHMS591244-supplement-SupportFiles.pdf]

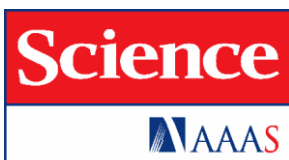

Supplementary Materials for  
**Ligand-Controlled C(sp<sup>3</sup>)-H Arylation and Olefination in Synthesis of  
Unnatural Chiral  $\alpha$ -Amino Acids**

Jian He, Suhua Li, Youqian Deng, Haiyan Fu, Brian N. Laforteza, Jillian E. Spangler,  
Anna Homs, Jin-Quan Yu\*

\*Corresponding author. E-mail: yu200@scripps.edu

Published 14 March 2014, *Science* **343**, 1216 (2014)  
DOI: 10.1126/science.1249198

**This PDF file includes:**

Supplementary Text  
Figs. S1 to S3  
Tables S1 to S6  
NMR Spectra  
Full Reference List

## Table of Contents

|                                                                                                                                        |          |
|----------------------------------------------------------------------------------------------------------------------------------------|----------|
| General Information                                                                                                                    | S2       |
| Experimental Section                                                                                                                   |          |
| Substrate Preparation                                                                                                                  | S3–S8    |
| Ligand-Promoted Primary C(sp <sup>3</sup> )–H Arylation (Fig. 2A)                                                                      | S9–S26   |
| Ligand-Promoted Secondary C(sp <sup>3</sup> )–H Arylation (Fig. 3)                                                                     | S27–S39  |
| Sequential C(sp <sup>3</sup> )–H Arylation Reactions (Fig. 4)                                                                          | S40–S47  |
| Ligand-Enabled C(sp <sup>3</sup> )–H Arylation with Heteroaryl Iodides (Fig. 5A)                                                       | S48–S50  |
| Auxiliary Cleavage (Fig. 2B)                                                                                                           | S51–S52  |
| Synthesis of <i>N</i> -Boc-Protected Unnatural Amino Acid Derivatives <i>via</i><br>C(sp <sup>3</sup> )–H Olefination (Fig. 5B and 5C) | S53–S60  |
| Synthesis and Reactivity of Palladacycle Intermediates in C(sp <sup>3</sup> )–H<br>Arylation (Fig. 6)                                  | S61–S67  |
| Synthesis of <i>N</i> -Fmoc-Protected Unnatural Amino Acid                                                                             | S68–S70  |
| Intramolecular Isotope Effect and Ligand Acceleration                                                                                  | S71      |
| <sup>1</sup> H and <sup>13</sup> C NMR Spectra                                                                                         | S72–S129 |

**General Information:** Solvents were obtained from Sigma-Aldrich, Alfa-Aesar and Acros and used directly without further purification. Amino acids and 2,3,5,6-tetrafluoro-4-(trifluoromethyl)aniline were obtained from the commercial sources or synthesized following literature procedures, and used to prepare the corresponding amides. Analytical thin layer chromatography was performed on 0.25 mm silica gel 60-F254. Visualization was carried out with UV light and Vogel's permanganate. <sup>1</sup>H NMR spectra were recorded on Bruker AMX-400 instrument (400 MHz) or Bruker DRX-600 instrument (600 MHz). Chemical shifts were quoted in parts per million (ppm) referenced to 0.0 ppm for tetramethylsilane. The following abbreviations (or combinations thereof) were used to explain multiplicities: s = singlet, d = doublet, t = triplet, q = quartet, m = multiplet, br = broad. Coupling constants, *J*, were reported in Hertz unit (Hz). <sup>13</sup>C NMR spectra were recorded on Bruker AMX-400 instrument (100 MHz) or Bruker DRX-600 instrument (150 MHz), and were fully decoupled by broad band proton decoupling. Chemical shifts were reported in ppm referenced to the center line of a triplet at 77.0 ppm of chloroform-*d*. In the <sup>13</sup>C NMR analysis, peaks that correspond to those of the polyfluoroarylamide auxiliary appeared as nearly invisible, complex sets of multiplets; they are omitted in the following spectroscopic analysis. High-resolution mass spectra (HRMS) were recorded on an Agilent Mass spectrometer using ESI-TOF (electrospray ionization-time of flight). Enantiomeric excesses values were determined on a Hitachi LaChrom Elite HPLC system using commercially available chiral columns. Optical rotation data were obtained on a Perkin-Elmer 341 polarimeter. Melting points were recorded on a Fisher-Johns 12-144 melting point apparatus.

## Experimental Section

### A. Substrate Preparation

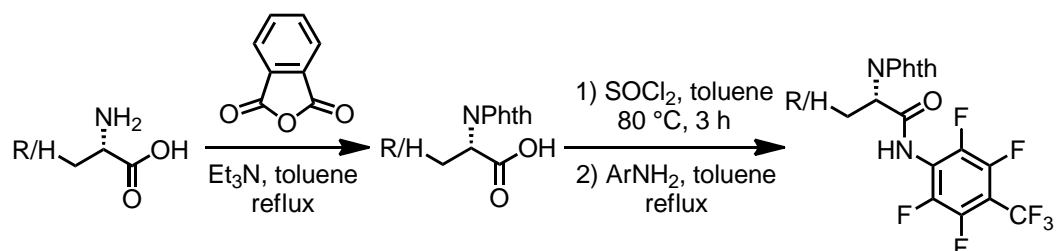

**General Procedure for the Preparation of Amide Substrates:** To a 100 mL round-bottom flask were added the appropriate amino acid (20 mmol), finely ground phthalic anhydride (20 mmol or 40 mmol in the synthesis of lysine derivatives), toluene (45 mL), and triethylamine (2 mmol, 0.28 mL). After refluxing the reaction mixture overnight, the crude product was evacuated and dissolved in DCM. After adding concentrated hydrochloric acid (0.4 mL), the mixture was washed by water (50 mL) and dried over anhydrous Na<sub>2</sub>SO<sub>4</sub>. The organic solvent was removed and recrystallized to give the *N*-phthalimido-protected amino acid.

*N*-Phthalimido-protected amino acid (10 mmol), thionyl chloride (25 mmol) and several drops of DMF were added in toluene at 80 °C for 3 h. After the reaction, the excess of thionyl chloride was removed *in vacuo*, and the crude acid chloride was added to a vigorously stirring solution of 2,3,5,6-tetrafluoro-4-(trifluoromethyl)aniline (10 mmol) in toluene (8 mL). The reaction mixture was stirred for 12 h under reflux, and then stirred at room temperature for 0.5 h. The product mixture was concentrated *in vacuo* and was recrystallized from ethyl acetate/hexane to give the amide.

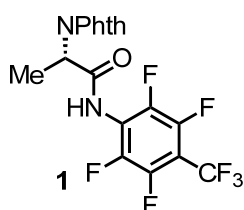

**(S)-2-Phthalimido-*N*-(2,3,5,6-tetrafluoro-4-(trifluoromethyl)phenyl)propanamide (1)**

$^1\text{H}$  NMR (600 MHz,  $\text{CDCl}_3$ )  $\delta$  8.39 (br s, 1H), 7.87-7.84 (m, 2H), 7.78-7.75 (m, 2H), 5.15 (q,  $J = 7.2$  Hz, 1H), 1.79 (d,  $J = 7.2$  Hz, 3H);  $^{13}\text{C}$  NMR (150 MHz,  $\text{CDCl}_3$ )  $\delta$  167.7, 167.5, 134.6, 131.4, 123.8, 49.9, 15.5; HRMS (ESI-TOF) Calcd for  $\text{C}_{18}\text{H}_{10}\text{F}_7\text{N}_2\text{O}_3$   $[\text{M}+\text{H}]^+$ : 435.0574; found: 435.0574. The ee value was determined by HPLC analysis on a Chiralcel OD-H column (20% isopropanol/hexanes, 0.5 mL/min) with  $t_r$  30.5 min (major), 56.1 min (minor): 97% ee.

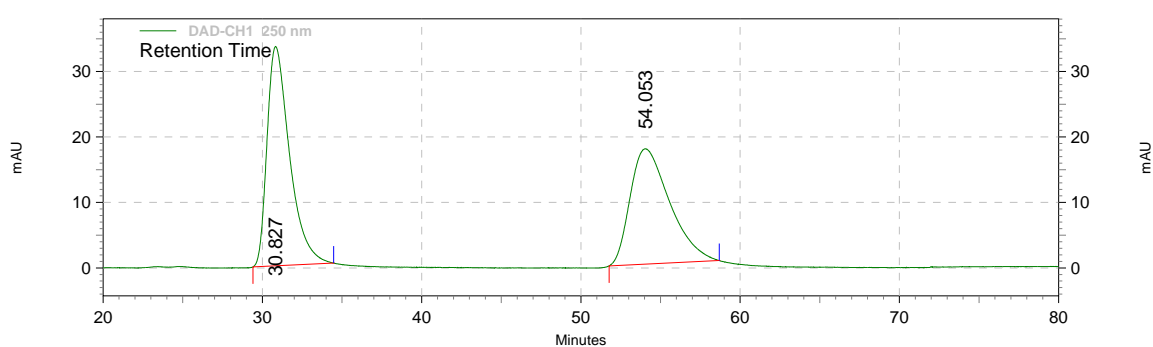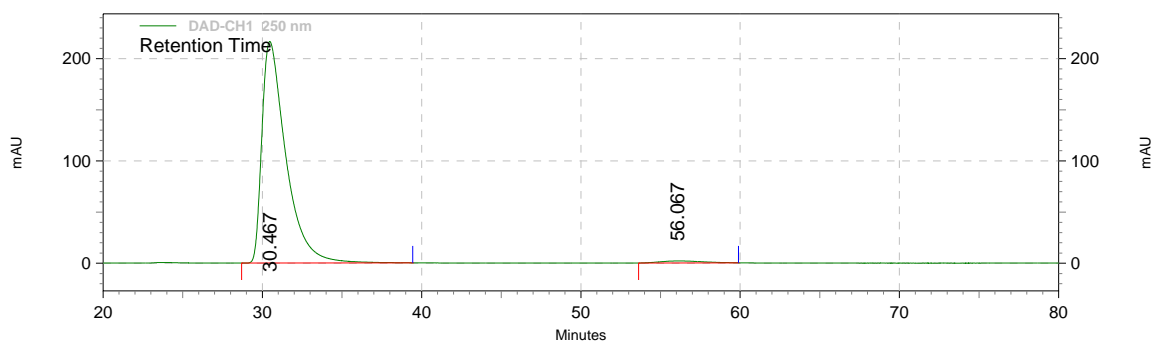

### DAD-CH1 250 nm Results

| Retention Time | Area     | Area % | Height | Height % |
|----------------|----------|--------|--------|----------|
| 30.467         | 90549321 | 98.49  | 866017 | 99.11    |
| 56.067         | 1392244  | 1.51   | 7815   | 0.89     |
| Totals         | 91941565 | 100.00 | 873832 | 100.00   |

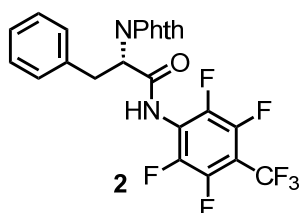

**(S)-3-Phenyl-2-phthalimido-*N*-(2,3,5,6-tetrafluoro-4-(trifluoromethyl)phenyl)propanamide (2)**

$^1\text{H}$  NMR (400 MHz,  $\text{CDCl}_3$ )  $\delta$  8.50 (br s, 1H), 7.83-7.78 (m, 2H), 7.75-7.71 (m, 2H), 7.23-7.13 (m, 5H), 5.34 (dd,  $J_1 = 6.4$  Hz,  $J_2 = 10.4$  Hz, 1H), 3.64 (ABqd,  $J_1 = 6.4$  Hz,  $J_2 = 14.2$  Hz, 1H), 3.58 (ABqd,  $J_1 = 10.4$  Hz,  $J_2 = 14.2$  Hz, 1H);  $^{13}\text{C}$  NMR (100 MHz,  $\text{CDCl}_3$ )  $\delta$  168.0, 166.6, 135.4, 134.7, 131.0, 128.9, 128.8, 127.4, 123.8, 56.6, 35.3; HRMS (ESI-TOF) Calcd for  $\text{C}_{24}\text{H}_{14}\text{F}_7\text{N}_2\text{O}_3$   $[\text{M}+\text{H}]^+$ : 511.0887; found: 511.0883.

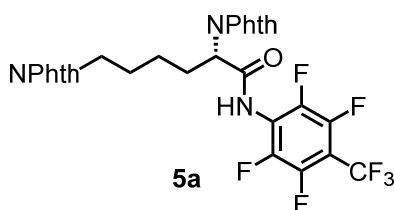

**(S)-2,6-Bis(phthalimido)-*N*-(2,3,5,6-tetrafluoro-4-(trifluoromethyl)phenyl)hexanamide (5a)**

$^1\text{H}$  NMR (400 MHz,  $\text{CDCl}_3$ )  $\delta$  8.68 (br s, 1H), 7.91-7.87 (m, 2H), 7.82-7.77 (m, 4H), 7.73-7.70 (m, 2H), 5.04 (dd,  $J_1 = 6.4$  Hz,  $J_2 = 9.6$  Hz, 1H), 3.70 (t,  $J = 7.0$  Hz, 2H), 2.49-2.32 (m, 2H), 1.82-1.74 (m, 2H), 1.50-1.38 (m, 2H);  $^{13}\text{C}$  NMR (150 MHz,  $\text{CDCl}_3$ )  $\delta$  168.5, 168.2, 166.8, 134.7, 134.0, 131.9, 131.3, 124.0, 123.2, 55.3, 36.9, 28.6, 27.5, 23.2; HRMS (ESI-TOF) Calcd for  $\text{C}_{29}\text{H}_{19}\text{F}_7\text{N}_3\text{O}_5$   $[\text{M}+\text{H}]^+$ : 622.1207; found: 622.1203.

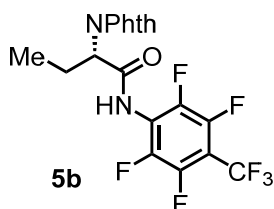

**(S)-2-Phthalimido-N-(2,3,5,6-tetrafluoro-4-(trifluoromethyl)phenyl)butanamide (5b)**

$^1\text{H}$  NMR (400 MHz,  $\text{CDCl}_3$ )  $\delta$  8.68 (br s, 1H), 7.95-7.91 (m, 2H), 7.83-7.79 (m, 2H), 5.00 (dd,  $J_1 = 6.8$  Hz,  $J_2 = 9.6$  Hz, 1H), 2.42-2.25 (m, 2H), 1.02 (t,  $J = 7.4$  Hz, 3H);  $^{13}\text{C}$  NMR (100 MHz,  $\text{CDCl}_3$ )  $\delta$  168.3, 167.1, 134.8, 131.2, 123.9, 57.1, 22.9, 10.6; HRMS (ESI-TOF) Calcd for  $\text{C}_{19}\text{H}_{12}\text{F}_7\text{N}_2\text{O}_3$   $[\text{M}+\text{H}]^+$ : 449.0731; found: 449.0733.

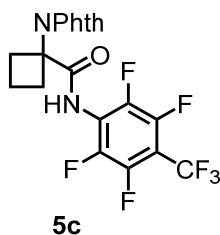

**1-Phthalimido-N-(2,3,5,6-tetrafluoro-4-(trifluoromethyl)phenyl)cyclobutanecarboxamide (5c)**

$^1\text{H}$  NMR (400 MHz,  $\text{CDCl}_3$ )  $\delta$  8.23 (br s, 1H), 7.89-7.85 (m, 2H), 7.79-7.76 (m, 2H), 3.14-3.09 (m, 2H), 2.84-2.75 (m, 2H), 2.19-2.00 (m, 2H);  $^{13}\text{C}$  NMR (100 MHz,  $\text{CDCl}_3$ )  $\delta$  169.1, 168.0, 134.6, 131.5, 123.5, 60.8, 31.6, 17.3; HRMS (ESI-TOF) Calcd for  $\text{C}_{20}\text{H}_{12}\text{F}_7\text{N}_2\text{O}_3$   $[\text{M}+\text{H}]^+$ : 461.0731; found: 461.0727.

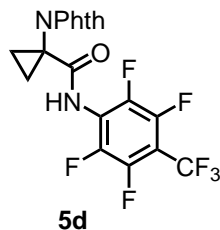

**1-Phthalimido-N-(2,3,5,6-tetrafluoro-4-(trifluoromethyl)phenyl)cyclopropanecarboxamide (5d)**

$^1\text{H}$  NMR (600 MHz,  $\text{CDCl}_3$ )  $\delta$  7.94-7.91 (m, 2H), 7.84-7.80 (m, 2H), 7.50 (br s, 1H), 1.97 (dd,  $J_1 = 5.4$  Hz,  $J_2 = 9.0$  Hz, 2H), 1.50 (dd,  $J_1 = 5.4$  Hz,  $J_2 = 9.0$  Hz, 2H);  $^{13}\text{C}$  NMR (150 MHz,  $\text{CDCl}_3$ )  $\delta$  168.0, 135.0, 131.2, 124.0, 33.5, 17.3; HRMS (ESI-TOF) Calcd for  $\text{C}_{19}\text{H}_9\text{F}_7\text{N}_2\text{O}_3\text{Na}$   $[\text{M}+\text{Na}]^+$ : 469.0394; found: 469.0389.

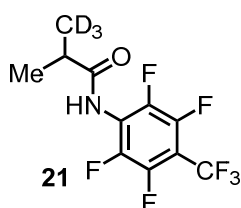

**3,3,3-Trideuterio-2-methyl-N-(2,3,5,6-tetrafluoro-4-(trifluoromethyl)phenyl)propionamide (21)**

$^1\text{H}$  NMR (600 MHz,  $\text{CDCl}_3$ )  $\delta$  7.00 (br s, 1H), 2.67 (q,  $J = 7.2$  Hz, 1H), 1.31 (d,  $J = 7.2$  Hz, 3H);  $^{13}\text{C}$  NMR (150 MHz,  $\text{CDCl}_3$ )  $\delta$  174.6, 35.6, 19.3; HRMS (ESI-TOF) Calcd for  $\text{C}_{11}\text{H}_6\text{D}_3\text{F}_7\text{NO}$   $[\text{M}+\text{H}]^+$ : 307.0752; found: 307.0754.

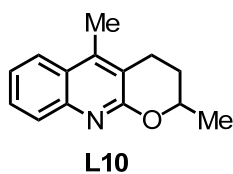

**2,5-Dimethyl-3,4-dihydro-2H-pyrano[2,3-b]quinoline (L10)**

**L10** was synthesized according to the literature procedure (27).  $^1\text{H}$  NMR (400 MHz,  $\text{CDCl}_3$ )  $\delta$  7.89 (d,  $J = 8.4$  Hz, 1H), 7.83 (d,  $J = 8.4$  Hz, 1H), 7.59-7.55 (m, 1H), 7.39-7.35 (m, 1H), 4.42-4.35 (m, 1H), 3.04-2.98 (m, 1H), 2.92-2.83 (m, 1H), 2.56 (s, 3H), 2.18-2.12 (m, 1H), 1.90-1.76 (m, 1H), 1.52 (d,  $J = 6.4$  Hz, 3H).

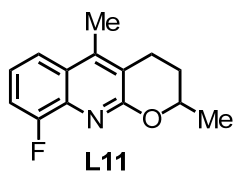

**9-Fluoro-2,5-dimethyl-3,4-dihydro-2H-pyrano[2,3-b]quinoline (L11)**



**L11** was synthesized according to the literature procedure (27).  $^1\text{H}$  NMR (400 MHz,  $\text{CDCl}_3$ )  $\delta$  7.69-7.61 (m, 1H), 7.31-7.25 (m, 2H), 4.44-4.36 (m, 1H), 3.04-2.98 (m, 1H), 2.92-2.84 (m, 1H), 2.55 (s, 3H), 2.19-2.13 (m, 1H), 1.91-1.76 (m, 1H), 1.52 (d,  $J = 6.4$  Hz, 3H).

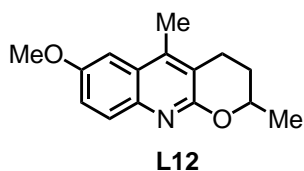

**7-Methoxy-2,5-dimethyl-3,4-dihydro-2H-pyrano[2,3-b]quinoline (L12)**

**L12** was synthesized according to the literature procedure (27).  $^1\text{H}$  NMR (400 MHz,  $\text{CDCl}_3$ )  $\delta$  7.74 (d,  $J = 8.8$  Hz, 1H), 7.24 (d,  $J = 8.8$  Hz, 1H), 7.12 (s, 1H), 4.40-4.34 (m, 1H), 3.93 (s, 3H), 3.02-2.96 (m, 1H), 2.90-2.82 (m, 1H), 2.53 (s, 3H), 2.18-2.11 (m, 1H), 1.90-1.75 (m, 1H), 1.52 (d,  $J = 6.4$  Hz, 3H).

## B. Ligand-Promoted Primary C(sp<sup>3</sup>)-H Arylation

### Condition Screening Scheme

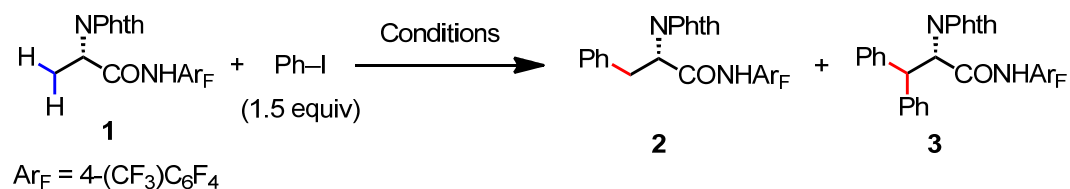

### Condition Screening Tables

Screening experiments were carried out using (S)-2-Phthalimido-N-(2,3,5,6-tetrafluoro-4-(trifluoromethyl)phenyl)propanamide (**1**) (43.4 mg, 0.1 mmol) as the substrate and iodobenzene. The conditions for each trial are specified in the tables below. All yields were determined by analysis of the crude <sup>1</sup>H NMR (CDCl<sub>3</sub>) spectrum using CH<sub>2</sub>Br<sub>2</sub> as the internal standard after filtration of the reaction mixture through a pad of silica gel.

**Table S1: Ligand Screening**

|           |     |     |     |     |     |     |
|-----------|-----|-----|-----|-----|-----|-----|
|           |     |     |     |     |     |     |
| <b>2:</b> | 47% | 29% | 52% | 65% | 87% | 88% |
| <b>3:</b> | 1%  | 0%  | 0%  | 2%  | 13% | 12% |
|           |     |     |     |     |     |     |
| <b>2:</b> | 76% | 77% | 79% | 91% | 94% |     |
| <b>3:</b> | 5%  | 23% | 21% | 9%  | 2%  |     |
|           |     |     |     |     |     |     |
| <b>2:</b> | 59% | 83% | 66% |     |     |     |
| <b>3:</b> | 1%  | 17% | 3%  |     |     |     |

Pd(TFA)<sub>2</sub> (10 mol%), ligand (20 mol%), TFA (20 mol%), Ag<sub>2</sub>CO<sub>3</sub> (1.5 equiv), DCE, 100 °C, 20 h

**Table S2: Further Optimization and Control Experiments**

| Entry | Pd catalyst (mol%)        | L7 (mol%) | Ag salt (equiv)                       | Temp. (°C) | <sup>1</sup> H NMR yield (%) |          |
|-------|---------------------------|-----------|---------------------------------------|------------|------------------------------|----------|
|       |                           |           |                                       |            | <b>2</b>                     | <b>3</b> |
| 1     | none                      | 20        | Ag <sub>2</sub> CO <sub>3</sub> (1.5) | 100        | 0                            | 0        |
| 2     | Pd(TFA) <sub>2</sub> (10) | 20        | Ag <sub>2</sub> CO <sub>3</sub> (1.5) | 100        | 94                           | 2        |
| 3     | Pd(TFA) <sub>2</sub> (10) | 40        | Ag <sub>2</sub> CO <sub>3</sub> (1.5) | 100        | 60                           | 0        |
| 4     | Pd(TFA) <sub>2</sub> (5)  | 10        | Ag <sub>2</sub> CO <sub>3</sub> (1.5) | 100        | 79                           | 2        |
| 5     | Pd(OAc) <sub>2</sub> (10) | 20        | Ag <sub>2</sub> CO <sub>3</sub> (1.5) | 100        | 80                           | 10       |
| 6     | Pd(TFA) <sub>2</sub> (10) | 20        | Ag <sub>3</sub> PO <sub>4</sub> (1.5) | 100        | 82                           | 2        |
| 7     | Pd(TFA) <sub>2</sub> (10) | 20        | Ag <sub>2</sub> CO <sub>3</sub> (1)   | 100        | 75                           | 2        |
| 8     | Pd(TFA) <sub>2</sub> (10) | 20        | AgOAc (3)                             | 100        | 45                           | 1        |
| 9     | Pd(TFA) <sub>2</sub> (10) | 20        | AgTFA (3)                             | 100        | 0                            | 0        |
| 10    | Pd(TFA) <sub>2</sub> (10) | 20        | none                                  | 100        | 0                            | 0        |
| 11    | Pd(TFA) <sub>2</sub> (10) | 20        | Ag <sub>2</sub> CO <sub>3</sub> (1.5) | 90         | 53                           | 1        |
| 12    | Pd(TFA) <sub>2</sub> (10) | 20        | Ag <sub>2</sub> CO <sub>3</sub> (1.5) | 80         | 32                           | 0        |
| 13    | Pd(TFA) <sub>2</sub> (10) | 0         | Ag <sub>2</sub> CO <sub>3</sub> (1.5) | 100        | 47                           | 1        |
| 14    | Pd(TFA) <sub>2</sub> (20) | 0         | Ag <sub>2</sub> CO <sub>3</sub> (1.5) | 100        | 55                           | 1        |
| 15    | Pd(TFA) <sub>2</sub> (30) | 0         | Ag <sub>2</sub> CO <sub>3</sub> (1.5) | 100        | 52                           | 1        |
| 16    | Pd(TFA) <sub>2</sub> (10) | 0         | Ag <sub>2</sub> CO <sub>3</sub> (1.5) | 100        | 32*                          | N/A      |

Ph-I (1.5 equiv), TFA (20 mol%), DCE, air, 20 h. \***1** (1.0 equiv) and **2** (0.5 equiv) were added, and the yield was based on the crude <sup>1</sup>H NMR (minus 50% of **2**).

### General Procedure Scheme A

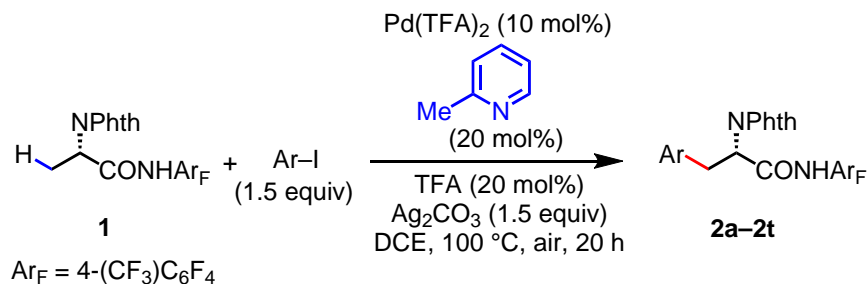

**General Arylation Procedure A:** Substrate **1** (0.1 mmol, 43.4 mg), Pd(TFA)<sub>2</sub> (0.01 mmol, 3.3 mg), and Ag<sub>2</sub>CO<sub>3</sub> (0.15 mmol, 41.4 mg) were weighed out open to air and placed in a microwave tube (5 mL) with a magnetic stir bar. The aryl iodide (0.15 mmol), 2-picoline (0.02 mmol, 2 μL), TFA (0.02 mmol, 2 μL), and DCE (0.5 mL) were added. The reaction vessel was sealed and the mixture was first stirred at room temperature for 10 min and then heated to 100 °C for 20 hours with vigorous stirring. Upon completion, the reaction mixture was cooled to room temperature. The solvents were removed under reduced pressure and the resulting mixture was purified by a silica gel-packed flash chromatography column using toluene/EtOAc or hexane/EtOAc as the eluent.

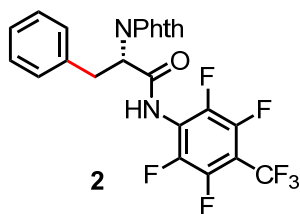

### (S)-3-Phenyl-2-phthalimido-*N*-(2,3,5,6-tetrafluoro-4-(trifluoromethyl)phenyl)propanamide (**2**)

Substrate **1** was arylated following the general arylation procedure A. Analysis of crude reaction mixture by <sup>1</sup>H NMR showed a > 20:1 ratio of mono- and diarylated products. After purification by column chromatography using toluene/EtOAc mixtures (30/1) as the eluent, **2** was obtained as a white solid (45.2 mg, 89%, 97% ee). The ee value was determined by HPLC analysis on a Chiralcel OD-H column (20% isopropanol/hexanes, 0.5 mL/min) with t<sub>r</sub> 51.4 min (major), 64.1 min (minor). <sup>1</sup>H NMR (600 MHz, CDCl<sub>3</sub>) δ 8.48 (br s, 1H), 7.84-

7.81 (m, 2H), 7.76-7.73 (m, 2H), 7.23-7.18 (m, 4H), 7.17-7.15 (m, 1H), 5.35 (dd,  $J_1 = 6.6$  Hz,  $J_2 = 10.8$  Hz, 1H), 3.64 (ABqd,  $J_1 = 6.6$  Hz,  $J_2 = 14.2$  Hz, 1H), 3.59 (ABqd,  $J_1 = 10.8$  Hz,  $J_2 = 14.2$  Hz, 1H).

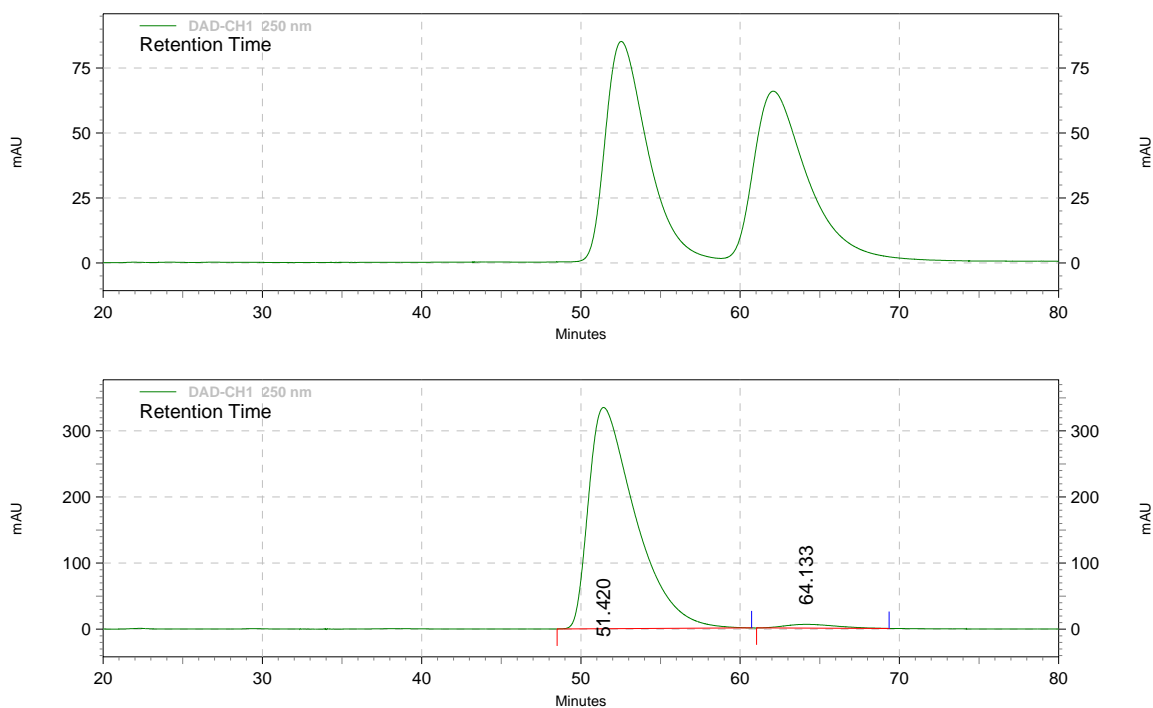

**DAD-CH1 250 nm Results**

| Retention Time | Area      | Area % | Height  | Height % |
|----------------|-----------|--------|---------|----------|
| 51.420         | 273651794 | 98.32  | 1338720 | 98.42    |
| 64.133         | 4670962   | 1.68   | 21523   | 1.58     |
| Totals         | 278322756 | 100.00 | 1360243 | 100.00   |

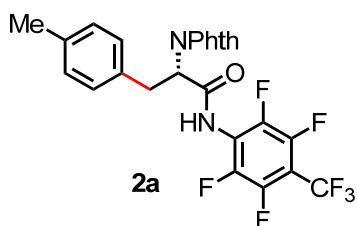

**(S)-2-Phthalimido-N-(2,3,5,6-tetrafluoro-4-(trifluoromethyl)phenyl)-3-(p-tolyl)propanamide (2a)**

Substrate **1** was arylated following the general arylation procedure A. Analysis of crude reaction mixture by  $^1\text{H}$  NMR showed a  $> 20:1$  ratio of mono- and diarylated products. After purification by column chromatography using toluene/EtOAc (30/1) as the eluent, **2a** was obtained as a white solid (48.1 mg, 92%).  $^1\text{H}$  NMR (600 MHz,  $\text{CDCl}_3$ )  $\delta$  8.46 (br s, 1H), 7.83-7.81 (m, 2H), 7.76-7.73 (m, 2H), 7.09 (d,  $J = 7.8$  Hz, 2H), 7.02 (d,  $J = 7.8$  Hz, 2H), 5.32 (dd,  $J_1 = 6.6$  Hz,  $J_2 = 10.2$  Hz, 1H), 3.60 (ABqd,  $J_1 = 6.6$  Hz,  $J_2 = 14.4$  Hz, 1H), 3.54 (ABqd,  $J_1 = 10.2$  Hz,  $J_2 = 14.4$  Hz, 1H), 2.23 (s, 3H);  $^{13}\text{C}$  NMR (150 MHz,  $\text{CDCl}_3$ )  $\delta$  168.1, 166.7, 137.1, 134.7, 132.2, 131.1, 129.6, 128.7, 123.8, 56.7, 34.9, 21.0; HRMS (ESI-TOF) Calcd for  $\text{C}_{25}\text{H}_{16}\text{F}_7\text{N}_2\text{O}_3$   $[\text{M}+\text{H}]^+$ : 525.1044; found: 525.1049.

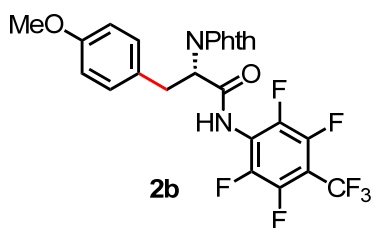

**(S)-3-(4-Methoxyphenyl)-2-phthalimido-N-(2,3,5,6-tetrafluoro-4-(trifluoromethyl)phenyl)propanamide (2b)**

Substrate **1** was arylated following the general arylation procedure A. Analysis of crude reaction mixture by  $^1\text{H}$  NMR showed a  $> 20:1$  ratio of mono- and diarylated products. After purification by column chromatography using toluene/EtOAc (30/1) as the eluent, **2b** was obtained as a white solid (48.2 mg, 89%).  $^1\text{H}$  NMR (600 MHz,  $\text{CDCl}_3$ )  $\delta$  8.52 (br s, 1H), 7.81-7.80 (m, 2H), 7.74-7.72 (m, 2H), 7.11 (d,  $J = 7.8$  Hz, 2H), 6.73 (d,  $J = 7.8$  Hz, 2H),

5.29 (dd,  $J_1 = 6.6$  Hz,  $J_2 = 10.2$  Hz, 1H), 3.71 (s, 3H), 3.57 (ABqd,  $J_1 = 6.6$  Hz,  $J_2 = 14.4$  Hz, 1H), 3.52 (ABqd,  $J_1 = 10.2$  Hz,  $J_2 = 14.4$  Hz, 1H);  $^{13}\text{C}$  NMR (150 MHz,  $\text{CDCl}_3$ )  $\delta$  168.1, 166.7, 158.7, 134.7, 131.1, 129.9, 127.3, 123.8, 114.2, 56.7, 55.1, 34.5; HRMS (ESI-TOF) Calcd for  $\text{C}_{25}\text{H}_{16}\text{F}_7\text{N}_2\text{O}_4$   $[\text{M}+\text{H}]^+$ : 541.0993; found: 541.0994.

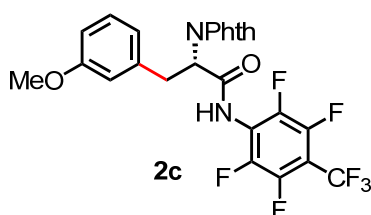

**(S)-3-(3-Methoxyphenyl)-2-phthalimido-N-(2,3,5,6-tetrafluoro-4-(trifluoromethyl)phenyl)propanamide (2c)**

Substrate **1** was arylated following the general arylation procedure A. Analysis of crude reaction mixture by  $^1\text{H}$  NMR showed a  $> 20:1$  ratio of mono- and diarylated products. After purification by column chromatography using toluene/EtOAc (30/1) as the eluent, **2c** was obtained as a white solid (46.6 mg, 86%).  $^1\text{H}$  NMR (600 MHz,  $\text{CDCl}_3$ )  $\delta$  8.49 (br s, 1H), 7.82-7.79 (m, 2H), 7.75-7.73 (m, 2H), 7.12-7.09 (m, 1H), 6.77 (d,  $J = 7.2$  Hz, 1H), 6.73-6.72 (m, 1H), 6.70-6.68 (m, 1H), 5.35 (dd,  $J_1 = 6.3$  Hz,  $J_2 = 10.5$  Hz, 1H), 3.67 (s, 3H), 3.61 (ABqd,  $J_1 = 6.3$  Hz,  $J_2 = 14.4$  Hz, 1H), 3.56 (ABqd,  $J_1 = 10.5$  Hz,  $J_2 = 14.4$  Hz, 1H);  $^{13}\text{C}$  NMR (150 MHz,  $\text{CDCl}_3$ )  $\delta$  168.0, 166.6, 159.8, 137.0, 134.7, 131.1, 129.9, 123.8, 121.1, 114.1, 113.3, 56.4, 55.1, 35.3; HRMS (ESI-TOF) Calcd for  $\text{C}_{25}\text{H}_{16}\text{F}_7\text{N}_2\text{O}_4$   $[\text{M}+\text{H}]^+$ : 541.0993; found: 541.0989.

Large scale reaction: Substrate **1** (10 mmol, 4.34 g),  $\text{Pd}(\text{TFA})_2$  (1.0 mmol, 0.33 g), and  $\text{Ag}_2\text{CO}_3$  (15 mmol, 4.14 g) were weighed in air and placed in a round-bottom flask (100 mL) with a magnetic stir bar. 3-Iodoanisole (15 mmol, 3.51 g), 2-picoline (2.0 mmol, 0.19 g), TFA (2.0 mmol, 0.23 g), and DCE (35 mL) were added. The pressure vessel was sealed. The reaction mixture was first stirred at room temperature for 10 min and then heated to 100 °C. Upon completion, the reaction mixture was purified by a silica gel-packed flash chromatography column, and **2c** was obtained in 87% yield (4.69 g).

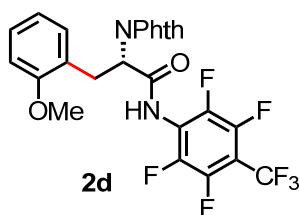

**(S)-3-(2-Methoxyphenyl)-2-phthalimido-N-(2,3,5,6-tetrafluoro-4-(trifluoromethyl)phenyl)propanamide (2d)**

Substrate **1** was arylated following the general arylation procedure A. Analysis of crude reaction mixture by  $^1\text{H}$  NMR showed a  $> 20:1$  ratio of mono- and diarylated products. After purification by column chromatography using toluene/EtOAc (30/1) as the eluent, **2d** was obtained as a white solid (47.3 mg, 88%).  $^1\text{H}$  NMR (600 MHz,  $\text{CDCl}_3$ )  $\delta$  8.53 (br s, 1H), 7.80-7.78 (m, 2H), 7.73-7.70 (m, 2H), 7.17-7.14 (m, 1H), 7.08-7.06 (m, 1H), 6.78 (d,  $J = 7.8$  Hz, 1H), 6.76-6.74 (m, 1H), 5.47 (dd,  $J_1 = 5.7$  Hz,  $J_2 = 9.9$  Hz, 1H), 3.77 (s, 3H), 3.65 (ABqd,  $J_1 = 5.7$  Hz,  $J_2 = 14.1$  Hz, 1H), 3.50 (ABqd,  $J_1 = 9.9$  Hz,  $J_2 = 14.1$  Hz, 1H);  $^{13}\text{C}$  NMR (150 MHz,  $\text{CDCl}_3$ )  $\delta$  167.9, 166.9, 157.3, 134.4, 131.3, 130.9, 128.9, 124.0, 123.6, 120.7, 110.4, 55.2, 54.6, 30.9; HRMS (ESI-TOF) Calcd for  $\text{C}_{25}\text{H}_{16}\text{F}_7\text{N}_2\text{O}_4$   $[\text{M}+\text{H}]^+$ : 541.0993; found: 541.0993.

Large scale reaction: Substrate **1** (15 mmol, 6.51 g),  $\text{Pd}(\text{TFA})_2$  (1.5 mmol, 0.50 g), and  $\text{Ag}_2\text{CO}_3$  (22.5 mmol, 6.12 g) were weighed in air and placed in a round-bottom flask (100 mL) with a magnetic stir bar. 2-Iodoanisole (22.5 mmol, 5.27 g), 2-picoline (3.0 mmol, 0.28 g), TFA (3.0 mmol, 0.34 g), and DCE (50 mL) were added. The pressure vessel was sealed. The reaction mixture was first stirred at room temperature for 10 min and then heated to 100 °C. Upon completion, the reaction mixture was purified by a silica gel-packed flash chromatography column, and **2d** was obtained in 80% yield (6.48 g).



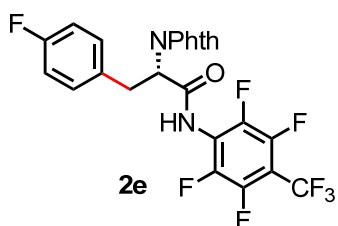

**(S)-3-(4-Fluorophenyl)-2-phthalimido-N-(2,3,5,6-tetrafluoro-4-(trifluoromethyl)phenyl)propanamide (2e)**

Substrate **1** was arylated following the general arylation procedure A. Analysis of crude reaction mixture by  $^1\text{H}$  NMR showed a > 20:1 ratio of mono- and diarylated products. After purification by column chromatography using toluene/EtOAc (30/1) mixtures as the eluent, **2e** was obtained as a white solid (47.4 mg, 90%).  $^1\text{H}$  NMR (600 MHz,  $\text{CDCl}_3$ )  $\delta$  8.54 (br s, 1H), 7.82-7.79 (m, 2H), 7.76-7.73 (m, 2H), 7.16-7.13 (m, 2H), 6.90-6.86 (m, 2H), 5.29 (dd,  $J_1 = 6.6$  Hz,  $J_2 = 10.2$  Hz, 1H), 3.60 (ABqd,  $J_1 = 6.6$  Hz,  $J_2 = 14.4$  Hz, 1H), 3.56 (ABqd,  $J_1 = 10.2$  Hz,  $J_2 = 14.4$  Hz, 1H);  $^{13}\text{C}$  NMR (150 MHz,  $\text{CDCl}_3$ )  $\delta$  168.0, 166.5, 162.0 (d,  $J_{\text{FC}} = 244.5$  Hz), 134.8, 131.1 (d,  $J_{\text{FC}} = 3.3$  Hz), 130.9, 130.5 (d,  $J_{\text{FC}} = 8.0$  Hz), 123.9, 115.7 (d,  $J_{\text{FC}} = 21.2$  Hz), 56.4, 34.4; HRMS (ESI-TOF) Calcd for  $\text{C}_{24}\text{H}_{13}\text{F}_8\text{N}_2\text{O}_3$   $[\text{M}+\text{H}]^+$ : 529.0793; found: 529.0793.

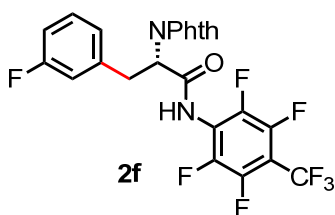

**(S)-3-(3-Fluorophenyl)-2-phthalimido-N-(2,3,5,6-tetrafluoro-4-(trifluoromethyl)phenyl)propanamide (2f)**

Substrate **1** was arylated following the general arylation procedure A. Analysis of crude reaction mixture by  $^1\text{H}$  NMR showed a > 20:1 ratio of mono- and diarylated products. After purification by column chromatography using toluene/EtOAc (30/1) as the eluent, **2f** was

obtained as a white solid (44.1 mg, 84%).  $^1\text{H}$  NMR (600 MHz,  $\text{CDCl}_3$ )  $\delta$  8.51 (br s, 1H), 7.82-7.79 (m, 2H), 7.76-7.73 (m, 2H), 7.19-7.15 (m, 1H), 6.97 (d,  $J = 7.2$  Hz, 1H), 6.91-6.89 (m, 1H), 6.87-6.83 (m, 1H), 5.32 (dd,  $J_1 = 6.0$  Hz,  $J_2 = 10.8$  Hz, 1H), 3.63 (ABqd,  $J_1 = 6.0$  Hz,  $J_2 = 14.4$  Hz, 1H), 3.58 (ABqd,  $J_1 = 10.8$  Hz,  $J_2 = 14.4$  Hz, 1H);  $^{13}\text{C}$  NMR (150 MHz,  $\text{CDCl}_3$ )  $\delta$  167.9, 166.4, 162.8 (d,  $J_{\text{FC}} = 245.4$  Hz), 138.0 (d,  $J_{\text{FC}} = 7.4$  Hz), 134.8, 130.9, 130.3 (d,  $J_{\text{FC}} = 8.3$  Hz), 124.6 (d,  $J_{\text{FC}} = 2.9$  Hz), 123.9, 115.9 (d,  $J_{\text{FC}} = 21.3$  Hz), 114.4 (d,  $J_{\text{FC}} = 20.7$  Hz), 56.1, 34.8; HRMS (ESI-TOF) Calcd for  $\text{C}_{24}\text{H}_{13}\text{F}_8\text{N}_2\text{O}_3$   $[\text{M}+\text{H}]^+$ : 529.0793; found: 529.0794.

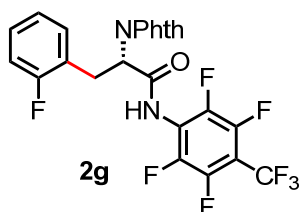

**(S)-3-(2-Fluorophenyl)-2-phthalimido-N-(2,3,5,6-tetrafluoro-4-(trifluoromethyl)phenyl)propanamide (2g)**

Substrate **1** was arylated following the general arylation procedure A. Analysis of crude reaction mixture by  $^1\text{H}$  NMR showed a  $> 20:1$  ratio of mono- and diarylated products. After purification by column chromatography using toluene/EtOAc (30/1) as the eluent, **2g** was obtained as a white solid (45.0 mg, 85%).  $^1\text{H}$  NMR (600 MHz,  $\text{CDCl}_3$ )  $\delta$  8.46 (br s, 1H), 7.81-7.78 (m, 2H), 7.74-7.71 (m, 2H), 7.18-7.13 (m, 2H), 6.96-6.93 (m, 2H), 5.36 (dd,  $J_1 = 5.7$  Hz,  $J_2 = 10.5$  Hz, 1H), 3.67 (ABqd,  $J_1 = 5.7$  Hz,  $J_2 = 14.1$  Hz, 1H), 3.60 (ABqd,  $J_1 = 10.5$  Hz,  $J_2 = 14.1$  Hz, 1H);  $^{13}\text{C}$  NMR (150 MHz,  $\text{CDCl}_3$ )  $\delta$  167.8, 166.3, 161.3 (d,  $J_{\text{FC}} = 244.7$  Hz), 134.7, 131.3 (d,  $J_{\text{FC}} = 4.5$  Hz), 131.0, 129.4 (d,  $J_{\text{FC}} = 8.1$  Hz), 124.4 (d,  $J_{\text{FC}} = 3.5$  Hz), 123.8, 122.7 (d,  $J_{\text{FC}} = 15.5$  Hz), 115.5 (d,  $J_{\text{FC}} = 21.6$  Hz), 54.8, 29.2 (d,  $J_{\text{FC}} = 2.1$  Hz); HRMS (ESI-TOF) Calcd for  $\text{C}_{24}\text{H}_{13}\text{F}_8\text{N}_2\text{O}_3$   $[\text{M}+\text{H}]^+$ : 529.0793; found: 529.0789.

Large scale reaction: Substrate **1** (10 mmol, 4.34 g),  $\text{Pd}(\text{TFA})_2$  (1.0 mmol, 0.33 g), and  $\text{Ag}_2\text{CO}_3$  (15 mmol, 4.14 g) were weighed in air and placed in a round-bottom flask (100

mL) with a magnetic stir bar. 1-Fluoro-2-iodobenzene (15 mmol, 3.33 g), 2-picoline (2.0 mmol, 0.19 g), TFA (2.0 mmol, 0.23 g), and DCE (35 mL) were added. The pressure vessel was sealed. The reaction mixture was first stirred at room temperature for 10 min and then heated to 100 °C. Upon completion, the reaction mixture was purified by a silica gel-packed flash chromatography column, and **2g** was obtained in 78% yield (4.11 g).

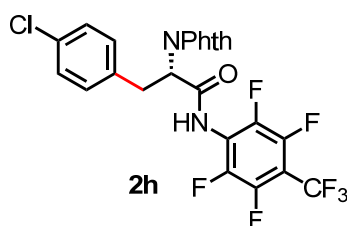

**(S)-3-(4-Chlorophenyl)-2-phthalimido-N-(2,3,5,6-tetrafluoro-4-(trifluoromethyl)phenyl)propanamide (2h)**

Substrate **1** was arylated following the general arylation procedure A. Analysis of crude reaction mixture by <sup>1</sup>H NMR showed a > 20:1 ratio of mono- and diarylated products. After purification by column chromatography using toluene/EtOAc (30/1) as the eluent, **2h** was obtained as a white solid (46.1 mg, 85%). <sup>1</sup>H NMR (600 MHz, CDCl<sub>3</sub>) δ 8.51 (br s, 1H), 7.82-7.79 (m, 2H), 7.76-7.73 (m, 2H), 7.17 (d, *J* = 8.4 Hz, 2H), 7.12 (d, *J* = 7.8 Hz, 2H), 5.30 (dd, *J*<sub>1</sub> = 6.6 Hz, *J*<sub>2</sub> = 10.2 Hz, 1H), 3.61-3.54 (m, 2H); <sup>13</sup>C NMR (150 MHz, CDCl<sub>3</sub>) δ 168.0, 166.4, 134.8, 133.9, 133.3, 130.9, 130.2, 129.0, 123.9, 56.1, 34.5; HRMS (ESI-TOF) Calcd for C<sub>24</sub>H<sub>13</sub>ClF<sub>7</sub>N<sub>2</sub>O<sub>3</sub> [M+H]<sup>+</sup>: 545.0497; found: 545.0496.

Large scale reaction: Substrate **1** (10 mmol, 4.34 g), Pd(TFA)<sub>2</sub> (1.0 mmol, 0.33 g), and Ag<sub>2</sub>CO<sub>3</sub> (15 mmol, 4.14 g) were weighed in air and placed in a round-bottom flask (100 mL) with a magnetic stir bar. 1-Chloro-2-iodobenzene (15 mmol, 3.58 g), 2-picoline (2.0 mmol, 0.19 g), TFA (2.0 mmol, 0.23 g), and DCE (35 mL) were added. The pressure vessel was sealed. The reaction mixture was first stirred at room temperature for 10 min and then heated to 100 °C. Upon completion, the reaction mixture was purified by a silica gel-packed flash chromatography column, and **2h** was obtained in 78% yield (4.24 g).

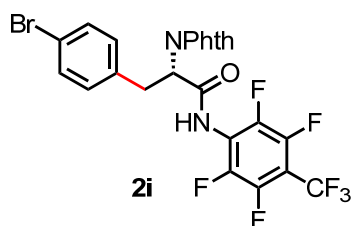

**(S)-3-(4-Bromophenyl)-2-phthalimido-N-(2,3,5,6-tetrafluoro-4-(trifluoromethyl)phenyl)propanamide (2i)**

Substrate **1** was arylated following the general arylation procedure A. Analysis of crude reaction mixture by  $^1\text{H}$  NMR showed a  $> 20:1$  ratio of mono- and diarylated products. After purification by column chromatography using toluene/EtOAc (30/1) as the eluent, **2i** was obtained as a white solid (50.7 mg, 86%).  $^1\text{H}$  NMR (600 MHz,  $\text{CDCl}_3$ )  $\delta$  8.50 (br s, 1H), 7.82-7.80 (m, 2H), 7.76-7.74 (m, 2H), 7.32 (d,  $J = 8.4$  Hz, 2H), 7.07 (d,  $J = 8.4$  Hz, 2H), 5.30 (dd,  $J_1 = 6.9$  Hz,  $J_2 = 9.9$  Hz, 1H), 3.60-3.53 (m, 2H);  $^{13}\text{C}$  NMR (150 MHz,  $\text{CDCl}_3$ )  $\delta$  167.9, 166.4, 134.9, 134.4, 131.9, 130.9, 130.6, 123.9, 121.4, 56.1, 34.6; HRMS (ESI-TOF) Calcd for  $\text{C}_{24}\text{H}_{13}\text{BrF}_7\text{N}_2\text{O}_3$   $[\text{M}+\text{H}]^+$ : 588.9992; found: 588.9999.

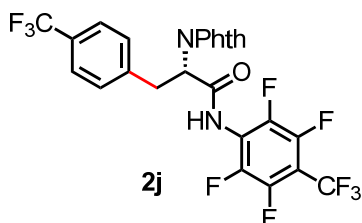

**(S)-2-Phthalimido-N-(2,3,5,6-tetrafluoro-4-(trifluoromethyl)phenyl)-3-(4-(trifluoromethyl)phenyl)propanamide (2j)**

Substrate **1** was arylated following the general arylation procedure A. Analysis of crude reaction mixture by  $^1\text{H}$  NMR showed a  $> 20:1$  ratio of mono- and diarylated products. After purification by column chromatography using toluene/EtOAc (30/1) as the eluent, **2j** was obtained as a white solid (49.5 mg, 86%).  $^1\text{H}$  NMR (600 MHz,  $\text{CDCl}_3$ )  $\delta$  8.45 (br s, 1H), 7.83-7.81 (m, 2H), 7.77-7.75 (m, 2H), 7.47 (d,  $J = 8.4$  Hz, 2H), 7.32 (d,  $J = 8.4$  Hz, 2H), 5.30 (dd,  $J_1 = 6.6$  Hz,  $J_2 = 10.2$  Hz, 1H), 3.72-3.64 (m, 2H);  $^{13}\text{C}$  NMR (150 MHz,  $\text{CDCl}_3$ )

$\delta$  167.9, 166.2, 139.6, 134.9, 130.8, 129.7 (q,  $J_{\text{FC}} = 32.3$  Hz), 129.3, 125.7 (q,  $J_{\text{FC}} = 3.8$  Hz), 124.0, 123.9 (q,  $J_{\text{FC}} = 270.5$  Hz), 55.9, 34.9; HRMS (ESI-TOF) Calcd for  $\text{C}_{25}\text{H}_{13}\text{F}_{10}\text{N}_2\text{O}_3$   $[\text{M}+\text{H}]^+$ : 579.0761; found: 579.0767.

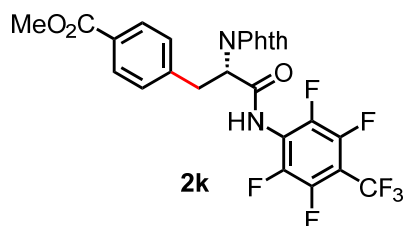

**(S)-Methyl 4-(3-oxo-2-phthalimido-3-((2,3,5,6-tetrafluoro-4-(trifluoromethyl)phenyl)amino)propyl)benzoate (2k)**

Substrate **1** was arylated following the general arylation procedure A. Analysis of crude reaction mixture by  $^1\text{H}$  NMR showed a  $> 20:1$  ratio of mono- and diarylated products. After purification by column chromatography using hexane/EtOAc (4/1) as the eluent, **2k** was obtained as a white solid (49.5 mg, 87%).  $^1\text{H}$  NMR (600 MHz,  $\text{CDCl}_3$ )  $\delta$  8.50 (br s, 1H), 7.86 (d,  $J = 7.8$  Hz, 2H), 7.81-7.79 (m, 2H), 7.74-7.73 (m, 2H), 7.27 (d,  $J = 7.8$  Hz, 2H), 5.36 (dd,  $J_1 = 7.5$  Hz,  $J_2 = 9.3$  Hz, 1H), 3.85 (s, 3H), 3.72-3.64 (m, 2H);  $^{13}\text{C}$  NMR (150 MHz,  $\text{CDCl}_3$ )  $\delta$  167.9, 166.7, 166.3, 140.8, 134.9, 130.9, 130.1, 129.2, 129.0, 124.0, 56.0, 52.1, 35.1; HRMS (ESI-TOF) Calcd for  $\text{C}_{26}\text{H}_{16}\text{F}_7\text{N}_2\text{O}_5$   $[\text{M}+\text{H}]^+$ : 569.0942; found: 569.0940.

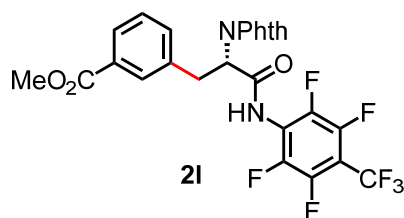

**(S)-Methyl 3-(3-oxo-2-phthalimido-3-((2,3,5,6-tetrafluoro-4-(trifluoromethyl)phenyl)amino)propyl)benzoate (2l)**

Substrate **1** was arylated following the general arylation procedure A. Analysis of crude reaction mixture by  $^1\text{H}$  NMR showed a  $> 20:1$  ratio of mono- and diarylated products. After purification by column chromatography using hexane/EtOAc (5/1) as the eluent, **2l** was obtained as a white solid (50.0 mg, 88%).  $^1\text{H}$  NMR (400 MHz,  $\text{CDCl}_3$ )  $\delta$  8.58 (br s, 1H), 7.85-7.77 (m, 4H), 7.75-7.70 (m, 2H), 7.41-7.38 (m, 1H), 7.30-7.26 (m, 1H), 5.34 (dd,  $J_1 = 6.0$  Hz,  $J_2 = 10.4$  Hz, 1H), 3.80 (s, 3H), 3.69 (ABqd,  $J_1 = 6.2$  Hz,  $J_2 = 14.3$  Hz, 1H), 3.63 (ABqd,  $J_1 = 10.4$  Hz,  $J_2 = 14.3$  Hz, 1H);  $^{13}\text{C}$  NMR (100 MHz,  $\text{CDCl}_3$ )  $\delta$  167.9, 166.6, 166.4, 136.0, 134.7, 133.5, 131.0, 130.5, 130.0, 128.9, 128.6, 123.9, 56.2, 52.1, 34.9; HRMS (ESI-TOF) Calcd for  $\text{C}_{26}\text{H}_{16}\text{F}_7\text{N}_2\text{O}_5$   $[\text{M}+\text{H}]^+$ : 569.0942; found: 569.0941.

Large scale reaction: Substrate **1** (10 mmol, 4.34 g),  $\text{Pd}(\text{TFA})_2$  (1.0 mmol, 0.33 g), and  $\text{Ag}_2\text{CO}_3$  (15 mmol, 4.14 g) were weighed in air and placed in a round-bottom flask (100 mL) with a magnetic stir bar. Methyl 3-iodobenzoate (15 mmol, 3.93 g), 2-picoline (2.0 mmol, 0.19 g), TFA (2.0 mmol, 0.23 g), and DCE (35 mL) were added. The pressure vessel was sealed. The reaction mixture was first stirred at room temperature for 10 min and then heated to 100  $^\circ\text{C}$ . Upon completion, the reaction mixture was purified by a silica gel-packed flash chromatography column, and **2l** was obtained in 78% yield (4.43 g).

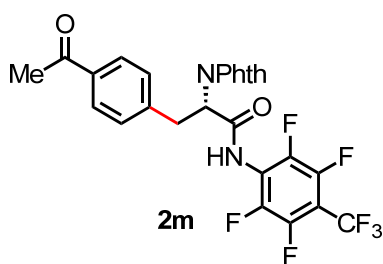

**(S)-3-(4-Acetylphenyl)-2-phthalimido-N-(2,3,5,6-tetrafluoro-4-(trifluoromethyl)phenyl)propanamide (2m)**

Substrate **1** was arylated following the general arylation procedure A. Analysis of crude reaction mixture by  $^1\text{H}$  NMR showed a  $> 20:1$  ratio of mono- and diarylated products. After purification by column chromatography using hexane/EtOAc (3/1) as the eluent, **2m** was obtained as a white solid (45.8 mg, 83%).  $^1\text{H}$  NMR (600 MHz,  $\text{CDCl}_3$ )  $\delta$  8.59 (br s, 1H),

7.81-7.73 (m, 6H), 7.29 (d,  $J = 7.8$  Hz, 2H), 5.37 (dd,  $J_1 = 6.6$  Hz,  $J_2 = 10.2$  Hz, 1H), 3.72-3.65 (m, 2H), 2.50 (s, 3H);  $^{13}\text{C}$  NMR (150 MHz,  $\text{CDCl}_3$ )  $\delta$  197.8, 167.9, 166.3, 141.2, 136.0, 134.8, 130.9, 129.2, 128.8, 123.9, 55.8, 35.0, 26.5; HRMS (ESI-TOF) Calcd for  $\text{C}_{26}\text{H}_{16}\text{F}_7\text{N}_2\text{O}_4$   $[\text{M}+\text{H}]^+$ : 553.0993; found: 553.0992.

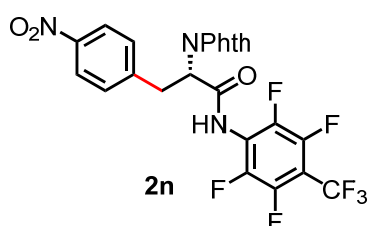

**(S)-3-(4-Nitrophenyl)-2-phthalimido-N-(2,3,5,6-tetrafluoro-4-(trifluoromethyl)phenyl)propanamide (2n)**

Substrate **1** was arylated following the general arylation procedure A. Analysis of crude reaction mixture by  $^1\text{H}$  NMR showed a  $> 20:1$  ratio of mono- and diarylated products. After purification by column chromatography using hexane/EtOAc (4/1) as the eluent, **2n** was obtained as a white solid (45.6 mg, 82%).  $^1\text{H}$  NMR (600 MHz,  $\text{CDCl}_3$ )  $\delta$  8.41 (br s, 1H), 8.06 (d,  $J = 7.8$  Hz, 2H), 7.83-7.81 (m, 2H), 7.78-7.76 (m, 2H), 7.38 (d,  $J = 7.8$  Hz, 2H), 5.37 (dd,  $J_1 = 6.6$  Hz,  $J_2 = 10.2$  Hz, 1H), 3.76-3.69 (m, 2H);  $^{13}\text{C}$  NMR (150 MHz,  $\text{CDCl}_3$ )  $\delta$  167.7, 166.0, 147.2, 143.3, 135.1, 130.7, 129.9, 124.1, 124.0, 55.4, 34.8; HRMS (ESI-TOF) Calcd for  $\text{C}_{24}\text{H}_{13}\text{F}_7\text{N}_3\text{O}_5$   $[\text{M}+\text{H}]^+$ : 556.0738; found: 556.0732.

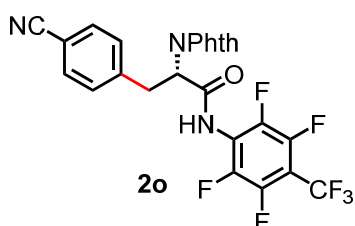

**(S)-3-(4-Cyanophenyl)-2-phthalimido-N-(2,3,5,6-tetrafluoro-4-(trifluoromethyl)phenyl)propanamide (2o)**

Substrate **1** was arylated following the general arylation procedure A. Analysis of crude reaction mixture by  $^1\text{H}$  NMR showed a  $> 20:1$  ratio of mono- and diarylated products. After

purification by column chromatography using hexane/EtOAc (5/1) as the eluent, **2o** was obtained as a white solid (45.9 mg, 86%).  $^1\text{H}$  NMR (600 MHz,  $\text{CDCl}_3$ )  $\delta$  8.42 (br s, 1H), 7.84-7.81 (m, 2H), 7.78-7.75 (m, 2H), 7.48 (d,  $J = 7.8$  Hz, 2H), 7.32 (d,  $J = 7.8$  Hz, 2H), 5.33 (dd,  $J_1 = 6.0$  Hz,  $J_2 = 10.8$  Hz, 1H), 3.70 (ABqd,  $J_1 = 6.0$  Hz,  $J_2 = 14.3$  Hz, 1H), 3.65 (ABqd,  $J_1 = 10.8$  Hz,  $J_2 = 14.3$  Hz, 1H);  $^{13}\text{C}$  NMR (150 MHz,  $\text{CDCl}_3$ )  $\delta$  167.7, 166.0, 141.3, 135.0, 132.5, 130.8, 129.8, 124.0, 118.4, 111.2, 55.4, 35.1; HRMS (ESI-TOF) Calcd for  $\text{C}_{25}\text{H}_{13}\text{F}_7\text{N}_3\text{O}_3$   $[\text{M}+\text{H}]^+$ : 536.0840; found: 536.0838.

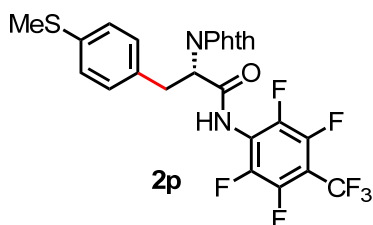

**(S)-(4-(Methylthio)phenyl)-2-phthalimido-3-N-(2,3,5,6-tetrafluoro-4-(trifluoromethyl)phenyl)propanamide (2p)**

Substrate **1** was arylated following the general arylation procedure A. Analysis of crude reaction mixture by  $^1\text{H}$  NMR showed a  $> 20:1$  ratio of mono- and diarylated products. After purification by column chromatography using toluene/EtOAc (30/1) as the eluent, **2p** was obtained as a white solid (39.8 mg, 72%).  $^1\text{H}$  NMR (400 MHz,  $\text{CDCl}_3$ )  $\delta$  8.53 (br s, 1H), 7.83-7.79 (m, 2H), 7.76-7.71 (m, 2H), 7.12-7.06 (m, 4H), 5.31 (dd,  $J_1 = 6.8$  Hz,  $J_2 = 10.0$  Hz, 1H), 3.62-3.52 (m, 2H), 2.39 (s, 3H);  $^{13}\text{C}$  NMR (100 MHz,  $\text{CDCl}_3$ )  $\delta$  168.0, 166.6, 137.6, 134.7, 132.0, 131.0, 129.3, 126.7, 123.9, 56.3, 34.7, 15.6; HRMS (ESI-TOF) Calcd for  $\text{C}_{25}\text{H}_{16}\text{F}_7\text{N}_2\text{O}_3\text{S}$   $[\text{M}+\text{H}]^+$ : 557.0764; found: 557.0765.

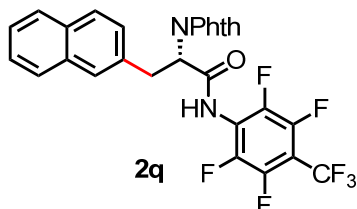



**(S)-3-(Naphthalen-2-yl)-2-phthalimido-N-(2,3,5,6-tetrafluoro-4-(trifluoromethyl)phenyl)propanamide (2q)**

Substrate **1** was arylated following the general arylation procedure A. Analysis of crude reaction mixture by  $^1\text{H}$  NMR showed a 14:1 ratio of mono- and diarylated products. After purification by column chromatography using toluene/EtOAc (30/1) as the eluent, **2q** was obtained as a light yellow solid (50.7 mg, 91%).  $^1\text{H}$  NMR (600 MHz,  $\text{CDCl}_3$ )  $\delta$  8.52 (br s, 1H), 7.77-7.71 (m, 4H), 7.68-7.62 (m, 4H), 7.41-7.37 (m, 2H), 7.36-7.34 (m, 1H), 5.47 (dd,  $J_1 = 6.6$  Hz,  $J_2 = 10.2$  Hz, 1H), 3.82-3.74 (m, 2H);  $^{13}\text{C}$  NMR (150 MHz,  $\text{CDCl}_3$ )  $\delta$  168.1, 166.7, 134.6, 133.3, 132.9, 132.5, 131.0, 128.7, 127.9, 127.6, 127.5, 126.5, 126.2, 125.9, 123.8, 56.3, 35.4; HRMS (ESI-TOF) Calcd for  $\text{C}_{28}\text{H}_{16}\text{F}_7\text{N}_2\text{O}_3$   $[\text{M}+\text{H}]^+$ : 561.1044; found: 561.1048.

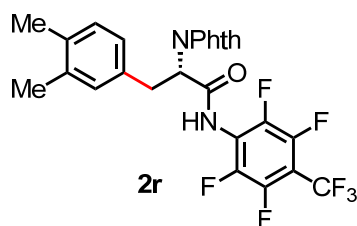

**(S)-3-(3,4-Dimethylphenyl)-2-phthalimido-N-(2,3,5,6-tetrafluoro-4-(trifluoromethyl)phenyl)propanamide (2r)**

Substrate **1** was arylated following the general arylation procedure A. Analysis of crude reaction mixture by  $^1\text{H}$  NMR showed a  $> 20:1$  ratio of mono- and diarylated products. After purification by column chromatography using toluene/EtOAc (30/1) as the eluent, **2r** was obtained as a white solid (47.0 mg, 87%).  $^1\text{H}$  NMR (600 MHz,  $\text{CDCl}_3$ )  $\delta$  8.44 (br s, 1H), 7.83-7.80 (m, 2H), 7.75-7.72 (m, 2H), 6.97-6.96 (m, 2H), 6.94-6.92 (m, 1H), 5.31 (dd,  $J_1 = 6.6$  Hz,  $J_2 = 10.2$  Hz, 1H), 3.58 (ABqd,  $J_1 = 6.6$  Hz,  $J_2 = 14.4$  Hz, 1H), 3.48 (ABqd,  $J_1 = 10.2$  Hz,  $J_2 = 14.4$  Hz, 1H), 2.14 (s, 3H), 2.11 (s, 3H);  $^{13}\text{C}$  NMR (150 MHz,  $\text{CDCl}_3$ )  $\delta$  168.1, 166.7, 137.2, 135.7, 134.6, 132.7, 131.2, 130.13, 130.09, 126.1, 123.8, 56.6, 34.9, 19.5, 19.3; HRMS (ESI-TOF) Calcd for  $\text{C}_{26}\text{H}_{18}\text{F}_7\text{N}_2\text{O}_3$   $[\text{M}+\text{H}]^+$ : 539.1200; found: 539.1195.

Large scale reaction: Substrate **1** (15 mmol, 6.51 g), Pd(TFA)<sub>2</sub> (1.5 mmol, 0.50 g), and Ag<sub>2</sub>CO<sub>3</sub> (22.5 mmol, 6.12 g) were weighed in air and placed in a round-bottom flask (100 mL) with a magnetic stir bar. 4-Iodo-*o*-xylene (22.5 mmol, 5.22 g), 2-picoline (3.0 mmol, 0.28 g), TFA (3.0 mmol, 0.34 g), and DCE (50 mL) were added. The pressure vessel was sealed. The reaction mixture was first stirred at room temperature for 10 min and then heated to 100 °C. Upon completion, the reaction mixture was purified by a silica gel-packed flash chromatography column, and **2r** was obtained in 79% yield (6.38 g).

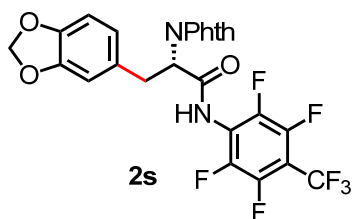

**(S)-3-(3,4-Methylenedioxyphenyl)-2-phthalimido-N-(2,3,5,6-tetrafluoro-4-(trifluoromethyl)phenyl)propanamide (2s)**

Substrate **1** was arylated following the general arylation procedure A. Analysis of crude reaction mixture by <sup>1</sup>H NMR showed a > 20:1 ratio of mono- and diarylated products. After purification by column chromatography using toluene/EtOAc (30/1) as the eluent, **2s** was obtained as a white solid (47.3 mg, 85%). <sup>1</sup>H NMR (600 MHz, CDCl<sub>3</sub>) δ 8.50 (br s, 1H), 7.85-7.81 (m, 2H), 7.77-7.73 (m, 2H), 6.70 (s, 1H), 6.63-6.60 (m, 2H), 5.88 (ABq, *J* = 1.5 Hz, 1H), 5.86 (ABq, *J* = 1.5 Hz, 1H), 5.27 (dd, *J*<sub>1</sub> = 6.0 Hz, *J*<sub>2</sub> = 10.2 Hz, 1H), 3.55 (ABqd, *J*<sub>1</sub> = 6.0 Hz, *J*<sub>2</sub> = 14.4 Hz, 1H), 3.49 (ABqd, *J*<sub>1</sub> = 10.2 Hz, *J*<sub>2</sub> = 14.4 Hz, 1H); <sup>13</sup>C NMR (150 MHz, CDCl<sub>3</sub>) δ 168.1, 166.6, 148.0, 146.8, 134.7, 131.1, 129.0, 123.9, 122.1, 109.1, 108.5, 101.0, 56.6, 35.0; HRMS (ESI-TOF) Calcd for C<sub>25</sub>H<sub>14</sub>F<sub>7</sub>N<sub>2</sub>O<sub>5</sub> [M+H]<sup>+</sup>: 555.0785; found: 555.0776.

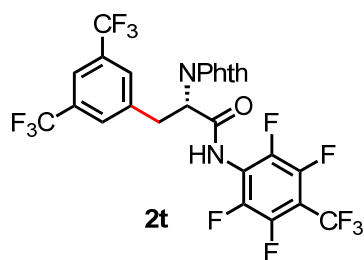

**(S)-3-(3,5-Bis(trifluoromethyl)phenyl)-2-phthalimido-N-(2,3,5,6-tetrafluoro-4-(trifluoromethyl)phenyl)propanamide (2t)**

Substrate **1** was arylated following the general arylation procedure A. Analysis of crude reaction mixture by  $^1\text{H}$  NMR showed a > 20:1 ratio of mono- and diarylated products. After purification by column chromatography using toluene/EtOAc (30/1) as the eluent, **2t** was obtained as a white solid (55.4 mg, 86%).  $^1\text{H}$  NMR (400 MHz,  $\text{CDCl}_3$ )  $\delta$  8.44 (br s, 1H), 7.83-7.73 (m, 4H), 7.68 (s, 1H), 7.63 (s, 2H), 5.31 (dd,  $J_1 = 6.0$  Hz,  $J_2 = 10.4$  Hz, 1H), 3.78 (ABqd,  $J_1 = 6.0$  Hz,  $J_2 = 14.4$  Hz, 1H), 3.68 (ABqd,  $J_1 = 10.4$  Hz,  $J_2 = 14.4$  Hz, 1H);  $^{13}\text{C}$  NMR (150 MHz,  $\text{CDCl}_3$ )  $\delta$  167.8, 165.8, 138.3, 135.1, 132.0 (q,  $J_{\text{FC}} = 33.3$  Hz), 130.7, 129.3 (q,  $J_{\text{FC}} = 3.6$  Hz), 124.0, 122.9 (q,  $J_{\text{FC}} = 271.2$  Hz), 121.4-121.3, 55.4, 34.6; HRMS (ESI-TOF) Calcd for  $\text{C}_{26}\text{H}_{12}\text{F}_{13}\text{N}_2\text{O}_3$   $[\text{M}+\text{H}]^+$ : 647.0635; found: 647.0630.

## C. Ligand-Promoted Secondary C(sp<sup>3</sup>)-H Arylation

### Condition Screening Scheme

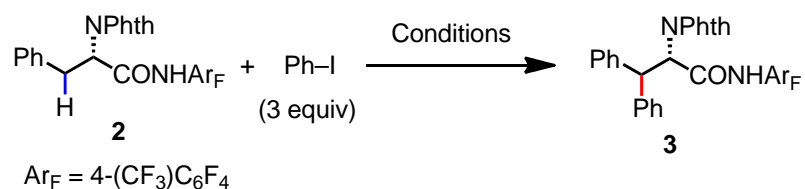

### Condition Screening Table

Screening experiments were carried out using (S)-3-Phenyl-2-phthalimido-*N*-(2,3,5,6-tetrafluoro-4-(trifluoromethyl)phenyl)propanamide (**2**) (51.0 mg, 0.1 mmol) as the substrate and iodobenzene. The conditions for each trial are specified in the tables below. All yields were determined by analysis of the crude <sup>1</sup>H NMR (CDCl<sub>3</sub>) spectrum using CH<sub>2</sub>Br<sub>2</sub> as the internal standard after filtration of the reaction mixture through a pad of silica gel.

**Table S3: Ligand Screening**

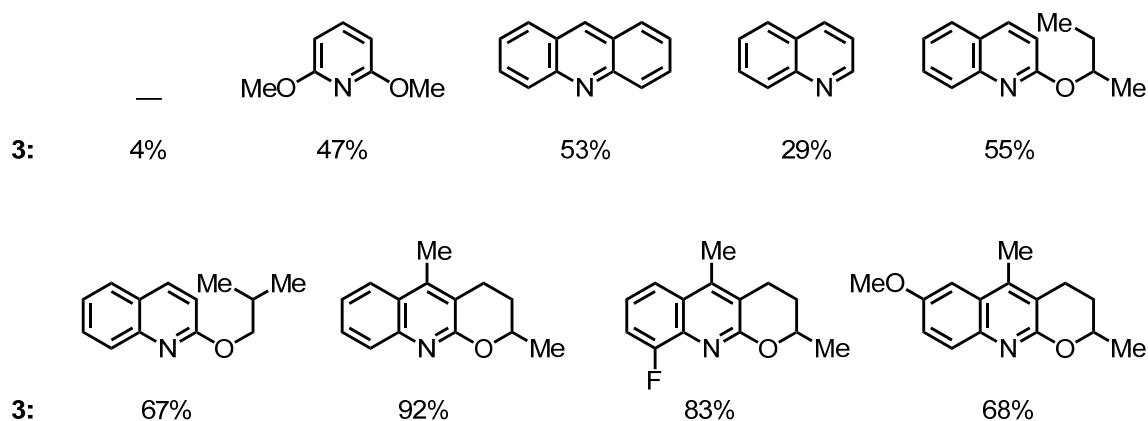

Pd(TFA)<sub>2</sub> (10 mol%), ligand (20 mol%), TFA (20 mol%), Ag<sub>2</sub>CO<sub>3</sub> (2 equiv), DCE, 100 °C, 20 h

### General Procedure Scheme B

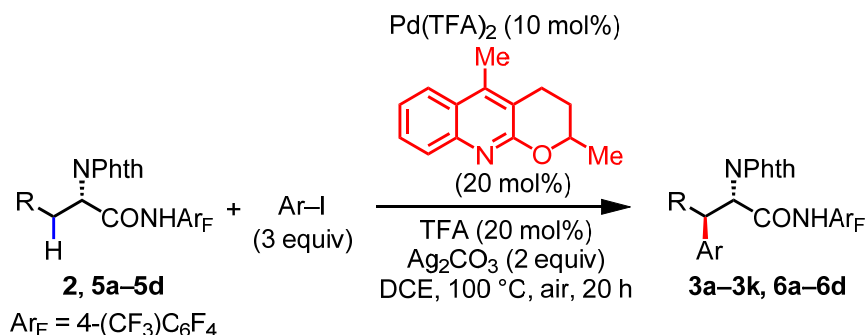

**General Arylation Procedure B:** Substrate **2** or **5a–5d** (0.1 mmol), Pd(TFA)<sub>2</sub> (0.01 mmol, 3.3 mg), **L10** (0.02 mmol, 4.3 mg) and Ag<sub>2</sub>CO<sub>3</sub> (0.2 mmol, 55.0 mg) were weighed out open to air and placed in a microwave tube (5 mL) with a magnetic stir bar. The aryl iodide (0.3 mmol), TFA (0.02 mmol, 2 μL), and DCE (0.5 mL) were added. The reaction vessel was sealed and the mixture was first stirred at room temperature for 10 min and then heated to 100 °C for 20 hours with vigorous stirring. Upon completion, the reaction mixture was cooled to room temperature. The solvents were removed under reduced pressure and the resulting mixture was purified by a silica gel-packed flash chromatography column using toluene/EtOAc or hexane/EtOAc as the eluent.

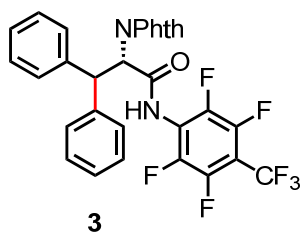

### (S)-3,3-Diphenyl-2-phthalimido-N-(2,3,5,6-tetrafluoro-4-(trifluoromethyl)phenyl)propanamide (**3**)

Substrate **2** was arylated following the general arylation procedure B. After purification by column chromatography using toluene/EtOAc (30/1) as the eluent, **3** was obtained as a white solid (52.7 mg, 90%). <sup>1</sup>H NMR (600 MHz, CDCl<sub>3</sub>) δ 8.70 (br s, 1H), 7.78-7.76 (m, 2H), 7.70-7.67 (m, 2H), 7.57 (d, *J* = 7.2 Hz, 2H), 7.38-7.36 (m, 2H), 7.32-7.26 (m, 3H), 7.16-7.14 (m, 2H), 7.06-7.04 (m, 1H), 5.90 (d, *J* = 12.6 Hz, 1H), 5.33 (d, *J* = 12.6 Hz, 1H);

$^{13}\text{C}$  NMR (150 MHz,  $\text{CDCl}_3$ )  $\delta$  165.3, 139.3, 138.8, 134.6, 130.9, 129.3, 128.8, 128.0, 127.5, 127.4, 123.8, 59.1, 50.9; HRMS (ESI-TOF) Calcd for  $\text{C}_{30}\text{H}_{18}\text{F}_7\text{N}_2\text{O}_3$   $[\text{M}+\text{H}]^+$ : 587.1200; found: 587.1193.

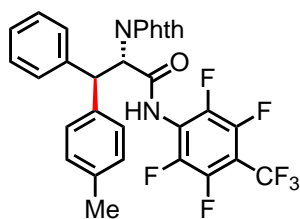

**3a**

**(2S,3R)-3-Phenyl-2-phthalimido-N-(2,3,5,6-tetrafluoro-4-(trifluoromethyl)phenyl)-3-(*p*-tolyl)propanamide (3a)**

Substrate **2** was arylated following the general arylation procedure B. Analysis of crude reaction mixture by  $^1\text{H}$  NMR showed a 20:1 diastereomer ratio. After purification by column chromatography using toluene/EtOAc (30/1) as the eluent, **3a** was obtained as a white solid (53.5 mg, 89%).  $^1\text{H}$  NMR (400 MHz,  $\text{CDCl}_3$ )  $\delta$  8.65 (br s, 1H), 7.78-7.74 (m, 2H), 7.70-7.67 (m, 2H), 7.57 (d,  $J = 8.0$  Hz, 2H), 7.31-7.29 (m, 2H), 7.19-7.12 (m, 4H), 7.06-7.02 (m, 1H), 5.89 (d,  $J = 12.8$  Hz, 1H), 5.28 (d,  $J = 12.8$  Hz, 1H), 2.30 (s, 3H);  $^{13}\text{C}$  NMR (100 MHz,  $\text{CDCl}_3$ )  $\delta$  165.4, 139.6, 137.8, 135.8, 134.5, 130.9, 130.0, 128.8, 127.8, 127.4, 127.3, 123.7, 59.0, 50.6, 21.1; HRMS (ESI-TOF) Calcd for  $\text{C}_{31}\text{H}_{20}\text{F}_7\text{N}_2\text{O}_3$   $[\text{M}+\text{H}]^+$ : 601.1357; found: 601.1349.

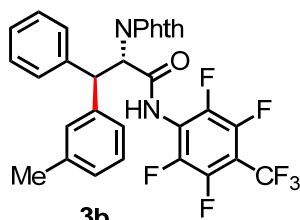

**3b**

**(2S,3R)-3-Phenyl-2-phthalimido-N-(2,3,5,6-tetrafluoro-4-(trifluoromethyl)phenyl)-3-(*m*-tolyl)propanamide (3b)**

Substrate **2** was arylated following the general arylation procedure B. Analysis of crude reaction mixture by  $^1\text{H}$  NMR showed a  $> 20:1$  diastereomer ratio. After purification by column chromatography using toluene/EtOAc (30/1) as the eluent, **3b** was obtained as a white solid (51.5 mg, 86%).  $^1\text{H}$  NMR (600 MHz,  $\text{CDCl}_3$ )  $\delta$  8.54 (br s, 1H), 7.78-7.75 (m, 2H), 7.69-7.66 (m, 2H), 7.39-7.36 (m, 2H), 7.31 (d,  $J = 7.8$  Hz, 2H), 7.28-7.25 (m, 1H), 7.16-7.14 (m, 2H), 7.09 (d,  $J = 7.8$  Hz, 1H), 7.06-7.03 (m, 1H), 5.89 (d,  $J = 12.6$  Hz, 1H), 5.29 (d,  $J = 12.6$  Hz, 1H), 2.35 (s, 3H);  $^{13}\text{C}$  NMR (150 MHz,  $\text{CDCl}_3$ )  $\delta$  165.3, 139.5, 139.1, 138.8, 134.5, 130.9, 129.2, 128.83, 128.80, 128.76, 127.5, 127.3, 124.9, 123.7, 58.9, 50.8, 21.5; HRMS (ESI-TOF) Calcd for  $\text{C}_{31}\text{H}_{20}\text{F}_7\text{N}_2\text{O}_3$   $[\text{M}+\text{H}]^+$ : 601.1357; found: 601.1355.

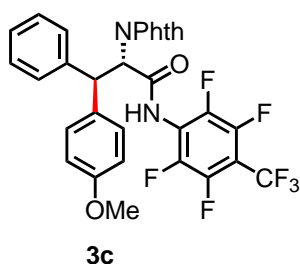

**(2S,3R)-3-(4-Methoxyphenyl)-3-phenyl-2-phthalimido-N-(2,3,5,6-tetrafluoro-4-(trifluoromethyl)phenyl)propanamide (3c)**

Substrate **2** was arylated following the general arylation procedure B. Analysis of crude reaction mixture by  $^1\text{H}$  NMR showed a  $> 20:1$  diastereomer ratio. After purification by column chromatography using toluene/EtOAc (30/1) as the eluent, **3c** was obtained as a white solid (52.5 mg, 85%).  $^1\text{H}$  NMR (400 MHz,  $\text{CDCl}_3$ )  $\delta$  8.70 (br s, 1H), 7.80-7.75 (m, 2H), 7.71-7.66 (m, 2H), 7.50-7.47 (m, 2H), 7.30-7.28 (m, 2H), 7.17-7.13 (m, 2H), 7.06-7.02 (m, 1H), 6.92-6.88 (m, 2H), 5.85 (d,  $J = 12.8$  Hz, 1H), 5.28 (d,  $J = 12.8$  Hz, 1H), 3.77 (s, 3H);  $^{13}\text{C}$  NMR (100 MHz,  $\text{CDCl}_3$ )  $\delta$  165.4, 159.2, 139.7, 134.6, 130.9, 130.8, 129.1, 128.8, 127.4, 127.3, 123.8, 114.7, 59.2, 55.2, 50.2; HRMS (ESI-TOF) Calcd for  $\text{C}_{31}\text{H}_{20}\text{F}_7\text{N}_2\text{O}_4$   $[\text{M}+\text{H}]^+$ : 617.1306; found: 617.1295.

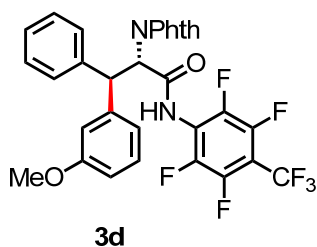

**(2S,3R)-3-(3-Methoxyphenyl)-3-phenyl-2-phthalimido-N-(2,3,5,6-tetrafluoro-4-(trifluoromethyl)phenyl)propanamide (3d)**

Substrate **2** was arylated following the general arylation procedure B. Analysis of crude reaction mixture by  $^1\text{H}$  NMR showed a  $> 20:1$  diastereomer ratio. After purification by column chromatography using toluene/EtOAc (30/1) as the eluent, **3d** was obtained as a white solid (49.6 mg, 81%).  $^1\text{H}$  NMR (600 MHz,  $\text{CDCl}_3$ )  $\delta$  8.56 (br s, 1H), 7.78-7.76 (m, 2H), 7.70-7.67 (m, 2H), 7.32-7.29 (m, 3H), 7.18-7.14 (m, 3H), 7.09-7.08 (m, 1H), 7.07-7.04 (m, 1H), 6.82-6.80 (m, 1H), 5.89 (d,  $J = 12.6$  Hz, 1H), 5.30 (d,  $J = 12.6$  Hz, 1H), 3.80 (s, 3H);  $^{13}\text{C}$  NMR (150 MHz,  $\text{CDCl}_3$ )  $\delta$  165.2, 160.1, 140.5, 139.3, 134.6, 130.9, 130.4, 128.8, 127.5, 127.4, 123.8, 120.0, 114.1, 113.1, 58.8, 55.2, 50.8; HRMS (ESI-TOF) Calcd for  $\text{C}_{31}\text{H}_{20}\text{F}_7\text{N}_2\text{O}_4$   $[\text{M}+\text{H}]^+$ : 617.1306; found: 617.1300.

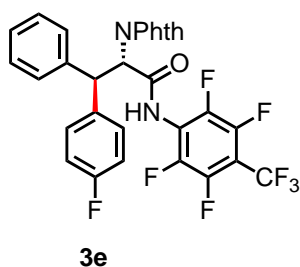

**(2S,3R)-3-(4-Fluorophenyl)-3-phenyl-2-phthalimido-N-(2,3,5,6-tetrafluoro-4-(trifluoromethyl)phenyl)propanamide (3e)**

Substrate **2** was arylated following the general arylation procedure B. Analysis of crude reaction mixture by  $^1\text{H}$  NMR showed a  $> 20:1$  diastereomer ratio. After purification by column chromatography using toluene/EtOAc (30/1) as the eluent, **3e** was obtained as a white solid (46.2 mg, 76%).  $^1\text{H}$  NMR (600 MHz,  $\text{CDCl}_3$ )  $\delta$  8.93 (br s, 1H), 7.80-7.77 (m,



2H), 7.72-7.69 (m, 2H), 7.53-7.51 (m, 2H), 7.29-7.26 (m, 2H), 7.18-7.15 (m, 2H), 7.08-7.03 (m, 3H), 5.83 (d,  $J = 12.6$  Hz, 1H), 5.32 (d,  $J = 12.6$  Hz, 1H);  $^{13}\text{C}$  NMR (150 MHz,  $\text{CDCl}_3$ )  $\delta$  165.2, 162.2 (d,  $J_{\text{FC}} = 245.7$  Hz), 139.0, 134.7, 134.5 (d,  $J_{\text{FC}} = 3.2$  Hz), 130.7, 129.7 (d,  $J_{\text{FC}} = 8.1$  Hz), 128.9, 127.6, 127.4, 123.9, 116.1 (d,  $J_{\text{FC}} = 21.5$  Hz), 59.4, 50.2; HRMS (ESI-TOF) Calcd for  $\text{C}_{30}\text{H}_{17}\text{F}_8\text{N}_2\text{O}_3$   $[\text{M}+\text{H}]^+$ : 605.1106; found: 605.1097.

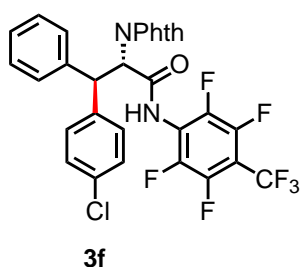

**(2S,3R)-3-(4-Chlorophenyl)-3-phenyl-2-phthalimido-N-(2,3,5,6-tetrafluoro-4-(trifluoromethyl)phenyl)propanamide (3f)**

Substrate **2** was arylated following the general arylation procedure B. Analysis of crude reaction mixture by  $^1\text{H}$  NMR showed a  $> 20:1$  diastereomer ratio. After purification by column chromatography using toluene/EtOAc (30/1) as the eluent, **3f** was obtained as a white solid (45.7 mg, 74%).  $^1\text{H}$  NMR (600 MHz,  $\text{CDCl}_3$ )  $\delta$  8.92 (br s, 1H), 7.79-7.76 (m, 2H), 7.72-7.69 (m, 2H), 7.48 (d,  $J = 8.4$  Hz, 2H), 7.32 (d,  $J = 8.4$  Hz, 2H), 7.27-7.26 (m, 2H), 7.17-7.14 (m, 2H), 7.08-7.05 (m, 1H), 5.84 (d,  $J = 12.6$  Hz, 1H), 5.31 (d,  $J = 12.6$  Hz, 1H);  $^{13}\text{C}$  NMR (150 MHz,  $\text{CDCl}_3$ )  $\delta$  165.2, 138.7, 137.3, 134.8, 133.8, 130.7, 129.4, 129.3, 129.0, 127.7, 127.5, 123.9, 59.2, 50.3; HRMS (ESI-TOF) Calcd for  $\text{C}_{30}\text{H}_{17}\text{ClF}_7\text{N}_2\text{O}_3$   $[\text{M}+\text{H}]^+$ : 621.0810; found: 621.0803.

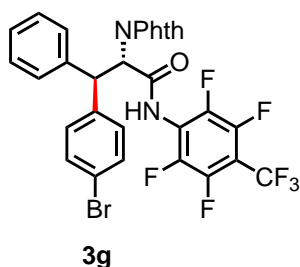

**(2S,3R)-3-(4-Bromophenyl)-3-phenyl-2-phthalimido-N-(2,3,5,6-tetrafluoro-4-(trifluoromethyl)phenyl)propanamide (3g)**

Substrate **2** was arylated following the general arylation procedure B. Analysis of crude reaction mixture by  $^1\text{H}$  NMR showed a > 20:1 diastereomer ratio. After purification by column chromatography using toluene/EtOAc (30/1) as the eluent, **3g** was obtained as a white solid (47.7 mg, 72%).  $^1\text{H}$  NMR (600 MHz,  $\text{CDCl}_3$ )  $\delta$  8.91 (br s, 1H), 7.79-7.77 (m, 2H), 7.72-7.70 (m, 2H), 7.48 (d,  $J = 8.4$  Hz, 2H), 7.42 (d,  $J = 8.4$  Hz, 2H), 7.27-7.26 (m, 2H), 7.17-7.14 (m, 2H), 7.08-7.06 (m, 1H), 5.83 (d,  $J = 12.6$  Hz, 1H), 5.30 (d,  $J = 12.6$  Hz, 1H);  $^{13}\text{C}$  NMR (150 MHz,  $\text{CDCl}_3$ )  $\delta$  165.1, 138.6, 137.8, 134.8, 132.2, 130.7, 129.7, 129.0, 127.7, 127.5, 123.9, 121.9, 59.1, 50.4; HRMS (ESI-TOF) Calcd for  $\text{C}_{30}\text{H}_{17}\text{BrF}_7\text{N}_2\text{O}_3$   $[\text{M}+\text{H}]^+$ : 665.0305; found: 665.0290.

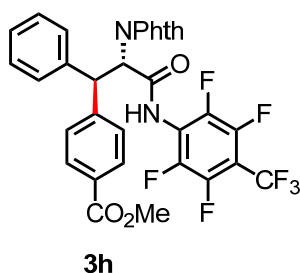

**Methyl 4-((1R,2S)-3-oxo-1-phenyl-2-phthalimido-3-((2,3,5,6-tetrafluoro-4-(trifluoromethyl)phenyl)amino)propyl)benzoate (3h)**

Substrate **2** was arylated following the general arylation procedure B. Analysis of crude reaction mixture by  $^1\text{H}$  NMR showed a > 20:1 diastereomer ratio. After purification by column chromatography using hexane/EtOAc (5/1) as the eluent, **3h** was obtained as a

white solid (52.8 mg, 82%).  $^1\text{H}$  NMR (600 MHz,  $\text{CDCl}_3$ )  $\delta$  8.92 (br s, 1H), 8.02 (d,  $J = 7.8$  Hz, 2H), 7.79-7.77 (m, 2H), 7.71-7.69 (m, 2H), 7.63 (d,  $J = 8.4$  Hz, 2H), 7.30-7.28 (m, 2H), 7.17-7.15 (m, 2H), 7.08-7.06 (m, 1H), 5.91 (d,  $J = 12.6$  Hz, 1H), 5.40 (d,  $J = 12.6$  Hz, 1H), 3.89 (s, 3H);  $^{13}\text{C}$  NMR (150 MHz,  $\text{CDCl}_3$ )  $\delta$  166.6, 165.1, 143.9, 138.4, 134.8, 130.7, 130.4, 129.6, 129.0, 128.1, 127.7, 127.6, 123.9, 58.9, 52.1, 50.8; HRMS (ESI-TOF) Calcd for  $\text{C}_{32}\text{H}_{20}\text{F}_7\text{N}_2\text{O}_5$   $[\text{M}+\text{H}]^+$ : 645.1255; found: 645.1246.

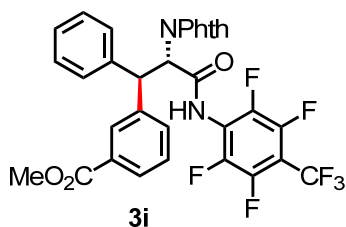

**Methyl 3-((1R,2S)-3-oxo-1-phenyl-2-phthalimido-3-((2,3,5,6-tetrafluoro-4-(trifluoromethyl)phenyl)amino)propyl)benzoate (3i)**

Substrate **2** was arylated following the general arylation procedure B. Analysis of crude reaction mixture by  $^1\text{H}$  NMR showed a  $> 20:1$  diastereomer ratio. After purification by column chromatography using hexane/EtOAc (5/1) as the eluent, **3i** was obtained as a white solid (50.2 mg, 78%).  $^1\text{H}$  NMR (600 MHz,  $\text{CDCl}_3$ )  $\delta$  8.97 (br s, 1H), 8.21-8.20 (m, 1H), 7.95-7.93 (m, 1H), 7.80-7.77 (m, 3H), 7.72-7.69 (m, 2H), 7.46-7.44 (m, 1H), 7.33-7.31 (m, 2H), 7.18-7.15 (m, 2H), 7.09-7.06 (m, 1H), 5.92 (d,  $J = 12.6$  Hz, 1H), 5.42 (d,  $J = 12.6$  Hz, 1H), 3.90 (s, 3H);  $^{13}\text{C}$  NMR (150 MHz,  $\text{CDCl}_3$ )  $\delta$  166.6, 165.1, 139.3, 138.6, 134.7, 132.5, 130.9, 130.8, 129.25, 129.23, 129.1, 129.0, 127.7, 127.6, 123.9, 59.1, 52.2, 50.6; HRMS (ESI-TOF) Calcd for  $\text{C}_{32}\text{H}_{20}\text{F}_7\text{N}_2\text{O}_5$   $[\text{M}+\text{H}]^+$ : 645.1255; found: 645.1264.

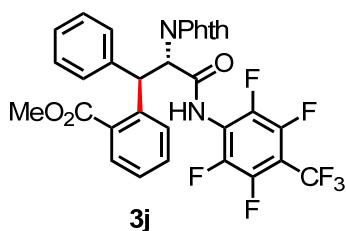

**Methyl 2-((1*R*,2*S*)-3-oxo-1-phenyl-2-phthalimido-3-((2,3,5,6-tetrafluoro-4-(trifluoromethyl)phenyl)amino)propyl)benzoate (**3j**)**

Substrate **2** was arylated following the general arylation procedure B. Analysis of crude reaction mixture by  $^1\text{H}$  NMR showed a > 20:1 diastereomer ratio. After purification by column chromatography using hexane/EtOAc (5/1) as the eluent, **3j** was obtained as a white solid (43.8 mg, 68%).  $^1\text{H}$  NMR (600 MHz,  $\text{CDCl}_3$ )  $\delta$  9.76 (br s, 1H), 7.90 (d,  $J = 7.8$  Hz, 1H), 7.84-7.80 (m, 3H), 7.72-7.69 (m, 2H), 7.62-7.59 (m, 1H), 7.35-7.33 (m, 3H), 7.17-7.14 (m, 2H), 7.08-7.06 (m, 1H), 6.75 (d,  $J = 12.6$  Hz, 1H), 6.01 (d,  $J = 12.6$  Hz, 1H), 4.01 (s, 3H);  $^{13}\text{C}$  NMR (150 MHz,  $\text{CDCl}_3$ )  $\delta$  169.5, 165.2, 140.0, 138.9, 134.5, 132.8, 131.0, 130.9, 129.6, 128.9, 128.0, 127.6, 127.52, 127.49, 123.8, 58.9, 52.9, 42.6; HRMS (ESI-TOF) Calcd for  $\text{C}_{32}\text{H}_{20}\text{F}_7\text{N}_2\text{O}_5$   $[\text{M}+\text{H}]^+$ : 645.1255; found: 645.1248.

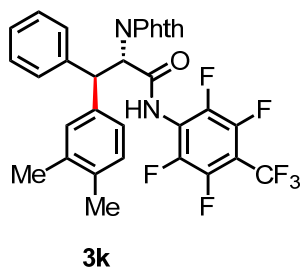

**(2*S*,3*R*)-3-(3,4-Dimethylphenyl)-3-phenyl-2-phthalimido-*N*-(2,3,5,6-tetrafluoro-4-(trifluoromethyl)phenyl)propanamide (**3k**)**

Substrate **2** was arylated following the general arylation procedure B. Analysis of crude reaction mixture by  $^1\text{H}$  NMR showed a 19:1 diastereomer ratio. After purification by column chromatography using toluene/EtOAc (30/1) as the eluent, **3k** was obtained as a white solid (54.2 mg, 88%).  $^1\text{H}$  NMR (600 MHz,  $\text{CDCl}_3$ )  $\delta$  8.48 (br s, 1H), 7.77-7.75 (m,

2H), 7.69-7.66 (m, 2H), 7.32-7.30 (m, 4H), 7.15-7.13 (m, 3H), 7.04-7.02 (m, 1H), 5.88 (d,  $J = 12.6$  Hz, 1H), 5.25 (d,  $J = 12.6$  Hz, 1H), 2.25 (s, 3H), 2.21 (s, 3H);  $^{13}\text{C}$  NMR (150 MHz,  $\text{CDCl}_3$ )  $\delta$  165.4, 139.8, 137.8, 136.5, 136.3, 134.5, 131.0, 130.6, 129.2, 128.8, 127.4, 127.2, 125.1, 123.7, 58.8, 50.6, 19.9, 19.4; HRMS (ESI-TOF) Calcd for  $\text{C}_{32}\text{H}_{22}\text{F}_7\text{N}_2\text{O}_3$   $[\text{M}+\text{H}]^+$ : 615.1513; found: 615.1512.

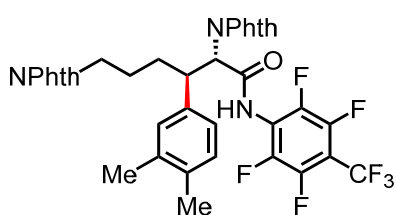

**6a**

**(2S,3R)-3-(3,4-Dimethylphenyl)-2,6-bis(phthalimido)-N-(2,3,5,6-tetrafluoro-4-(trifluoromethyl)phenyl)hexanamide (6a)**

Substrate **5a** was arylated following the general arylation procedure B. Analysis of crude reaction mixture by  $^1\text{H}$  NMR showed a  $> 20:1$  diastereomer ratio. After purification by column chromatography using hexane/EtOAc (3/1) as the eluent, **6a** was obtained as a white solid (47.8 mg, 66%).  $^1\text{H}$  NMR (600 MHz,  $\text{CDCl}_3$ )  $\delta$  8.30 (br s, 1H), 7.92-7.89 (m, 2H), 7.82-7.79 (m, 2H), 7.73-7.70 (m, 2H), 7.68-7.65 (m, 2H), 7.14-7.11 (m, 3H), 5.24 (d,  $J = 11.4$  Hz, 1H), 3.87-3.83 (m, 1H), 3.51 (t,  $J = 7.5$  Hz, 2H), 2.25 (s, 3H), 2.22 (s, 3H), 1.68-1.56 (m, 2H), 1.46-1.41 (m, 2H);  $^{13}\text{C}$  NMR (150 MHz,  $\text{CDCl}_3$ )  $\delta$  168.1, 165.3, 137.8, 136.7, 135.3, 134.7, 133.8, 131.9, 131.3, 130.6, 129.4, 125.6, 124.0, 123.1, 60.6, 43.9, 37.3, 30.1, 25.6, 19.8, 19.5; HRMS (ESI-TOF) Calcd for  $\text{C}_{37}\text{H}_{27}\text{F}_7\text{N}_3\text{O}_5$   $[\text{M}+\text{H}]^+$ : 726.1833; found: 726.1826.

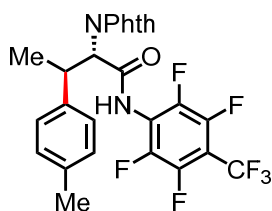

**6b**

**(2*S*,3*R*)-2-Phthalimido-*N*-(2,3,5,6-tetrafluoro-4-(trifluoromethyl)phenyl)-3-(*p*-tolyl)butanamide (6b)**

Substrate **5b** was arylated following the general arylation procedure B. Analysis of crude reaction mixture by  $^1\text{H}$  NMR showed a 15:1 diastereomer ratio. After purification by column chromatography using hexane/EtOAc (4/1) as the eluent, **6b** was obtained as a white solid (47.6 mg, 88%).  $^1\text{H}$  NMR (400 MHz,  $\text{CDCl}_3$ )  $\delta$  8.39 (br s, 1H), 7.98-7.93 (m, 2H), 7.84-7.80 (m, 2H), 7.33 (d,  $J = 8.0$  Hz, 2H), 7.21 (d,  $J = 8.0$  Hz, 2H), 5.22 (d,  $J = 12.0$  Hz, 1H), 4.07-3.99 (m, 1H), 2.34 (s, 3H), 1.26 (d,  $J = 6.8$  Hz, 3H);  $^{13}\text{C}$  NMR (100 MHz,  $\text{CDCl}_3$ )  $\delta$  168.4, 165.5, 137.79, 137.77, 134.8, 131.2, 130.0, 127.4, 124.0, 61.4, 39.0, 21.1, 20.0; HRMS (ESI-TOF) Calcd for  $\text{C}_{26}\text{H}_{18}\text{F}_7\text{N}_2\text{O}_3$   $[\text{M}+\text{H}]^+$ : 539.1200; found: 539.1196.

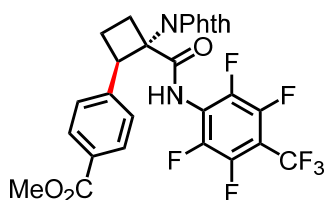

**6c-mono**

**Methyl 4-(2-phthalimido-2-((2,3,5,6-tetrafluoro-4-(trifluoromethyl)phenyl)carbamoyl)cyclobutyl)benzoate (6c-mono)**

Substrate **5c** was arylated following the general arylation procedure B. After purification by column chromatography using hexane/EtOAc (4/1) as the eluent, **6c-mono** was obtained as a white solid (35.6 mg, 60%).  $^1\text{H}$  NMR (600 MHz,  $\text{CDCl}_3$ )  $\delta$  7.97 (d,  $J = 8.4$  Hz, 2H), 7.91-7.87 (m, 2H), 7.81-7.78 (m, 2H), 7.57 (d,  $J = 8.4$  Hz, 2H), 7.29 (br s, 1H), 4.75 (t,  $J = 9.9$

Hz, 1H), 3.84 (s, 3H), 3.45-3.42 (m, 1H), 2.64-2.57 (m, 1H), 2.55-2.50 (m, 1H), 2.43-2.38 (m, 1H);  $^{13}\text{C}$  NMR (150 MHz,  $\text{CDCl}_3$ )  $\delta$  168.0, 167.0, 166.9, 143.2, 134.8, 131.5, 129.42, 129.39, 129.0, 123.7, 67.5, 52.0, 47.4, 28.3, 23.1; HRMS (ESI-TOF) Calcd for  $\text{C}_{28}\text{H}_{18}\text{F}_7\text{N}_2\text{O}_5$   $[\text{M}+\text{H}]^+$ : 595.1098; found: 595.1101.

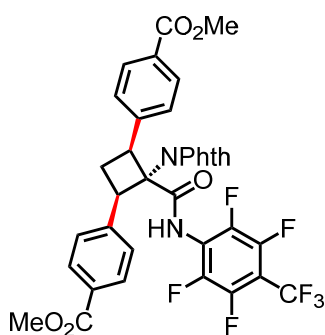

**6c-di**

**Dimethyl 4,4'-(2-phthalimido-2-((2,3,5,6-tetrafluoro-4-(trifluoromethyl)phenyl)carbamoyl)cyclobutane-1,3-diyl)dibenzoate (6c-di)**

**6c-di** was obtained as a yellow solid (22.0 mg, 30%).  $^1\text{H}$  NMR (600 MHz,  $\text{CDCl}_3$ )  $\delta$  7.97-7.92 (m, 6H), 7.83-7.81 (m, 2H), 7.56 (d,  $J = 8.4$  Hz, 4H), 7.36 (br s, 1H), 4.90-4.87 (m, 2H), 3.84 (s, 6H), 3.24-3.19 (m, 1H), 2.80-2.75 (m, 1H);  $^{13}\text{C}$  NMR (150 MHz,  $\text{CDCl}_3$ )  $\delta$  168.4, 167.0, 164.6, 142.6, 135.0, 131.4, 129.2, 129.0, 128.9, 123.9, 72.6, 52.0, 45.7, 26.8; HRMS (ESI-TOF) Calcd for  $\text{C}_{36}\text{H}_{24}\text{F}_7\text{N}_2\text{O}_7$   $[\text{M}+\text{H}]^+$ : 729.1466; found: 729.1453.

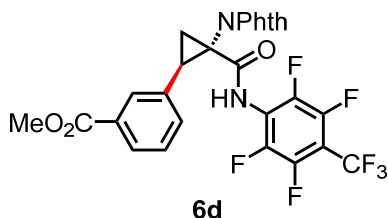

**6d**

**Methyl 3-(2-phthalimido-2-((2,3,5,6-tetrafluoro-4-(trifluoromethyl)phenyl)carbamoyl)cyclopropyl)benzoate (6d)**

Substrate **5d** was arylated following the general arylation procedure B. Analysis of crude reaction mixture by  $^1\text{H}$  NMR showed a > 20:1 ratio of mono- and diarylated products. After purification by column chromatography using hexane/EtOAc (2/1) as the eluent, **6d** was obtained as a yellow solid (40.5 mg, 70%).  $^1\text{H}$  NMR (400 MHz,  $\text{CDCl}_3$ )  $\delta$  8.14 (br s, 1H), 7.95-7.91 (m, 3H), 7.84-7.78 (m, 4H), 7.45 (t,  $J = 7.6$  Hz, 1H), 3.90 (s, 3H), 3.08 (t,  $J = 9.6$  Hz, 1H), 2.76 (dd,  $J_1 = 7.2$  Hz,  $J_2 = 9.2$  Hz, 1H), 2.05 (dd,  $J_1 = 7.2$  Hz,  $J_2 = 10.0$  Hz, 1H);  $^{13}\text{C}$  NMR (150 MHz,  $\text{CDCl}_3$ )  $\delta$  166.8, 164.3, 135.0, 133.8, 131.2, 130.4, 130.1, 129.2, 128.7, 124.0, 52.2, 40.5, 33.8, 17.4; HRMS (ESI-TOF) Calcd for  $\text{C}_{27}\text{H}_{16}\text{F}_7\text{N}_2\text{O}_5$   $[\text{M}+\text{H}]^+$ : 581.0942; found: 581.0943.



## D. Sequential C(sp<sup>3</sup>)-H Arylation Reactions

### General Procedure Scheme C

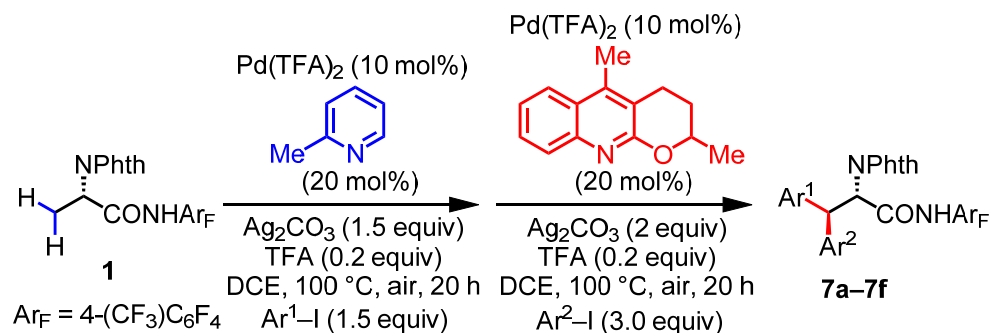

**General Arylation Procedure C:** Substrate **1** (0.1 mmol, 43.4 mg), Pd(TFA)<sub>2</sub> (0.01 mmol, 3.3 mg), and Ag<sub>2</sub>CO<sub>3</sub> (0.15 mmol, 41.4 mg) were weighed out open to air and placed in a microwave tube (5 mL) with a magnetic stir bar. Ar<sup>1</sup>-I (0.15 mmol), 2-picoline (0.02 mmol, 2 μL), TFA (0.02 mmol, 2 μL), and DCE (0.5 mL) were added and the reaction vessel was sealed. The reaction mixture was first stirred at room temperature for 10 min and then heated to 100 °C for 20 hours with vigorous stirring. Upon completion, the reaction mixture was cooled to room temperature. Pd(TFA)<sub>2</sub> (0.01 mmol, 3.3 mg), **L10** (0.02 mmol, 4.3 mg), and Ag<sub>2</sub>CO<sub>3</sub> (0.2 mmol, 55.0 mg) were weighed open to air and added in the reaction mixture. Ar<sup>2</sup>-I (0.3 mmol) and TFA (0.02 mmol, 2 μL) were then added. The reaction vessel was sealed. The mixture was first stirred at room temperature for 10 min and then heated to 100 °C for 20 hours with vigorous stirring. Upon completion, the reaction mixture was cooled to room temperature. The solvents were removed under reduced pressure and the resulting mixture was purified by a silica gel-packed flash chromatography column using toluene/EtOAc or hexane/EtOAc as the eluent.

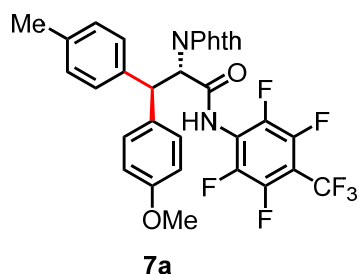

**(2S,3R)-3-(4-Methoxyphenyl)-2-phthalimido-N-(2,3,5,6-tetrafluoro-4-(trifluoromethyl)phenyl)-3-(*p*-tolyl)propanamide (7a)**

Substrate **1** was arylated following the general arylation procedure C. Analysis of crude reaction mixture by  $^1\text{H}$  NMR showed a 19:1 diastereomer ratio. 19% of monoarylated products were observed. After purification by column chromatography using toluene/EtOAc (30/1) as the eluent, **7a** was obtained as a white solid (42.9 mg, 68%).  $^1\text{H}$  NMR (600 MHz,  $\text{CDCl}_3$ )  $\delta$  8.68 (br s, 1H), 7.79-7.78 (m, 2H), 7.70-7.69 (m, 2H), 7.46 (d,  $J = 7.8$  Hz, 2H), 7.17 (d,  $J = 7.8$  Hz, 2H), 6.95 (d,  $J = 7.8$  Hz, 2H), 6.89 (d,  $J = 7.8$  Hz, 2H), 5.83 (d,  $J = 12.6$  Hz, 1H), 5.24 (d,  $J = 12.6$  Hz, 1H), 3.77 (s, 3H), 2.14 (s, 3H);  $^{13}\text{C}$  NMR (150 MHz,  $\text{CDCl}_3$ )  $\delta$  165.5, 159.1, 136.9, 136.7, 134.5, 131.1, 131.0, 129.5, 129.0, 127.2, 123.8, 114.7, 59.2, 55.2, 49.8, 20.9; HRMS (ESI-TOF) Calcd for  $\text{C}_{32}\text{H}_{22}\text{F}_7\text{N}_2\text{O}_4$   $[\text{M}+\text{H}]^+$ : 631.1462; found: 631.1460.

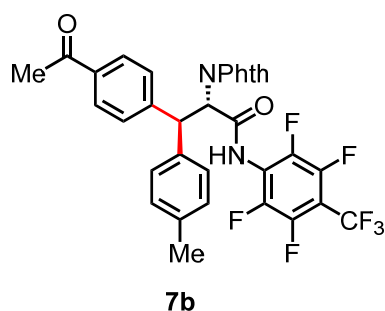

**(2S,3S)-3-(4-Acetylphenyl)-2-phthalimido-N-(2,3,5,6-tetrafluoro-4-(trifluoromethyl)phenyl)-3-(*p*-tolyl)propanamide (7b)**

Substrate **1** was arylated following the general arylation procedure C. Analysis of crude reaction mixture by  $^1\text{H}$  NMR showed a 19:1 diastereomer ratio. 23% of monoarylated products were observed. After purification by column chromatography using hexane/EtOAc (3/1) as the eluent, **7b** was obtained as a white solid (39.7 mg, 62%).  $^1\text{H}$  NMR (600 MHz,  $\text{CDCl}_3$ )  $\delta$  8.54 (br s, 1H), 7.76-7.73 (m, 4H), 7.69-7.66 (m, 2H), 7.44-7.40 (m, 4H), 7.17 (d,  $J = 7.8$  Hz, 2H), 5.91 (d,  $J = 12.6$  Hz, 1H), 5.41 (d,  $J = 12.6$  Hz, 1H), 2.43 (s, 3H), 2.29 (s, 3H);  $^{13}\text{C}$  NMR (150 MHz,  $\text{CDCl}_3$ )  $\delta$  197.5, 165.0, 145.1, 138.2, 136.0, 135.1, 134.7, 130.8, 130.2, 128.9, 127.8, 127.7, 123.9, 58.4, 50.3, 26.5, 21.0; HRMS (ESI-TOF) Calcd for  $\text{C}_{33}\text{H}_{22}\text{F}_7\text{N}_2\text{O}_4$   $[\text{M}+\text{H}]^+$ : 643.1462; found: 643.1458.

Large scale reaction: Substrate **1** (5 mmol, 2.17 g),  $\text{Pd}(\text{TFA})_2$  (0.5 mmol, 0.17 g), and  $\text{Ag}_2\text{CO}_3$  (7.5 mmol, 2.07 g) were weighed out open to air and added in a round-bottom flask (100 mL) with a magnetic stir bar. 4'-Iodoacetophenone (7.5 mmol, 1.85 g), 2-picoline (1 mmol, 100  $\mu\text{L}$ ), TFA (1 mmol, 0.11 g), and DCE (25 mL) were added and the pressure vessel was sealed. The reaction mixture was first stirred at room temperature for 10 min and then heated to 100  $^\circ\text{C}$  for 20 hours under vigorous stirring. Upon completion, the reaction mixture was cooled to room temperature.  $\text{Pd}(\text{TFA})_2$  (0.5 mmol, 0.17 g), **L10** (1 mmol, 0.21 g),  $\text{Ag}_2\text{CO}_3$  (10 mmol, 2.75 g), and 4-iodotoluene (15 mmol, 3.27 g) were weighed out open to air and added in the reaction vessel, and TFA (1 mmol, 0.11 g) was then added. The vessel was sealed. The reaction mixture was first stirred at room temperature for 10 min and then heated to 100  $^\circ\text{C}$  for 20 hours under vigorous stirring. Upon completion, the resulting mixture was purified by a silica gel-packed flash chromatography column, and **7b** was obtained in 60% yield (1.92 g).

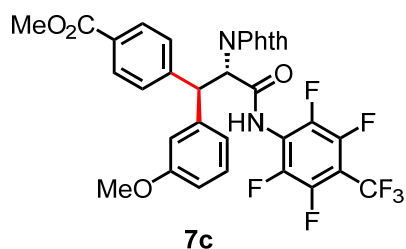

**Methyl 4-((1R,2S)-1-(3-methoxyphenyl)-3-oxo-2-phthalimido-3-((2,3,5,6-tetrafluoro-4-(trifluoromethyl)phenyl)amino)propyl)benzoate (7c)**

Substrate **1** was arylated following the general arylation procedure C. Analysis of crude reaction mixture by  $^1\text{H}$  NMR showed a > 20:1 diastereomer ratio. 25% of monoarylated products were observed. After purification by column chromatography using hexane/EtOAc (5/1) as the eluent, **7c** was obtained as a white solid (43.5 mg, 65%).  $^1\text{H}$  NMR (600 MHz,  $\text{CDCl}_3$ )  $\delta$  8.45 (br s, 1H), 7.84 (d,  $J = 7.8$  Hz, 2H), 7.78-7.77 (m, 2H), 7.71-7.69 (m, 2H), 7.40 (d,  $J = 7.8$  Hz, 2H), 7.33-7.30 (m, 1H), 7.16 (d,  $J = 7.8$  Hz, 1H), 7.07 (s, 1H), 6.83 (d,  $J = 7.8$  Hz, 1H), 5.90 (d,  $J = 12.6$  Hz, 1H), 5.41 (d,  $J = 12.6$  Hz, 1H), 3.80 (s, 6H);  $^{13}\text{C}$  NMR (150 MHz,  $\text{CDCl}_3$ )  $\delta$  166.5, 164.9, 160.2, 144.5, 139.7, 134.7, 130.8, 130.6, 130.2, 129.3, 127.6, 123.9, 120.0, 114.2, 113.3, 58.3, 55.3, 52.1, 50.6; HRMS (ESI-TOF) Calcd for  $\text{C}_{33}\text{H}_{22}\text{F}_7\text{N}_2\text{O}_6$   $[\text{M}+\text{H}]^+$ : 675.1361; found: 675.1358.

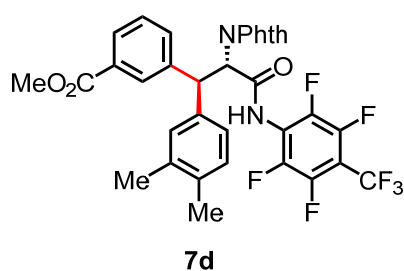

**Methyl 3-((1S,2S)-1-(3,4-dimethylphenyl)-3-oxo-2-phthalimido-3-((2,3,5,6-tetrafluoro-4-(trifluoromethyl)phenyl)amino)propyl)benzoate (7d)**

Substrate **1** was arylated following the general arylation procedure C. Analysis of crude reaction mixture by  $^1\text{H}$  NMR showed a > 20:1 diastereomer ratio. 16% of monoarylated products were observed. After purification by column chromatography using

hexane/EtOAc (3/1) as the eluent, **7d** was obtained as a white solid (44.1 mg, 66%). <sup>1</sup>H NMR (600 MHz, CDCl<sub>3</sub>) δ 8.42 (br s, 1H), 7.97 (s, 1H), 7.79-7.76 (m, 2H), 7.75-7.73 (m, 1H), 7.70-7.67 (m, 2H), 7.55-7.53 (m, 1H), 7.33-7.31 (m, 2H), 7.27-7.24 (m, 1H), 7.15 (d, *J* = 7.8 Hz, 1H), 5.90 (d, *J* = 12.6 Hz, 1H), 5.34 (d, *J* = 12.6 Hz, 1H), 3.84 (s, 3H), 2.26 (s, 3H), 2.21 (s, 3H); <sup>13</sup>C NMR (150 MHz, CDCl<sub>3</sub>) δ 166.5, 165.2, 140.3, 138.0, 136.8, 135.8, 134.6, 131.6, 130.9, 130.7, 130.6, 129.2, 129.0, 128.9, 128.6, 125.1, 123.8, 58.6, 52.1, 50.3, 19.9, 19.4; HRMS (ESI-TOF) Calcd for C<sub>34</sub>H<sub>24</sub>F<sub>7</sub>N<sub>2</sub>O<sub>5</sub> [M+H]<sup>+</sup>: 673.1568; found: 673.1566.

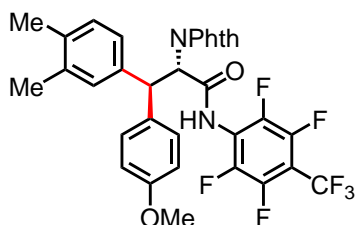

**7e**

**(2*S*,3*S*)-3-(3,4-Dimethylphenyl)-3-(4-methoxyphenyl)-2-phthalimido-*N*-(2,3,5,6-tetrafluoro-4-(trifluoromethyl)phenyl)propanamide (**7e**)**

Substrate **1** was arylated following the general arylation procedure C. Analysis of crude reaction mixture by <sup>1</sup>H NMR showed a > 20:1 diastereomer ratio. 19% of monoarylated products were observed. After purification by column chromatography using toluene/EtOAc (30/1) as the eluent, **7e** was obtained as a white solid (37.8 mg, 59%). <sup>1</sup>H NMR (600 MHz, CDCl<sub>3</sub>) δ 8.69 (br s, 1H), 7.80-7.78 (m, 2H), 7.70-7.69 (m, 2H), 7.46 (d, *J* = 7.8 Hz, 2H), 7.02-7.01 (m, 2H), 6.90-6.87 (m, 3H), 5.82 (d, *J* = 12.6 Hz, 1H), 5.20 (d, *J* = 12.6 Hz, 1H), 3.76 (s, 3H), 2.07 (s, 3H), 2.04 (s, 3H); <sup>13</sup>C NMR (150 MHz, CDCl<sub>3</sub>) δ 165.6, 159.1, 137.03, 136.99, 135.5, 134.5, 131.2, 131.0, 130.0, 129.0, 128.8, 124.3, 123.8, 114.6, 59.3, 55.2, 49.7, 19.7, 19.2; HRMS (ESI-TOF) Calcd for C<sub>33</sub>H<sub>24</sub>F<sub>7</sub>N<sub>2</sub>O<sub>4</sub> [M+H]<sup>+</sup>: 645.1619; found: 645.1618.

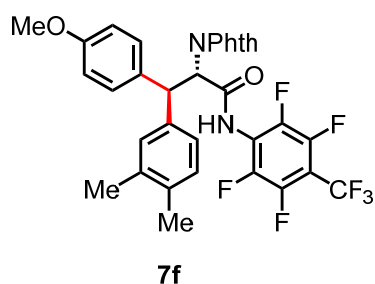

**(2*S*,3*R*)-3-(3,4-Dimethylphenyl)-3-(4-methoxyphenyl)-2-phthalimido-*N*-(2,3,5,6-tetrafluoro-4-(trifluoromethyl)phenyl)propanamide (7f)**

Substrate **1** was arylated following the general arylation procedure C. Analysis of crude reaction mixture by  $^1\text{H}$  NMR showed a 16:1 diastereomer ratio. 15% of monoarylated products were observed. After purification by column chromatography using toluene/EtOAc (30/1) as the eluent, **7f** was obtained as a white solid (38.8 mg, 60%). **7f** was recrystallized in EtOAc/hexane, and the structure was determined by X-ray diffraction.  $[\alpha]_{\text{D}}^{20} = -31.5$  ( $c = 1.00$ ,  $\text{CHCl}_3$ ); m.p. 192-193 °C (EtOAc/hexane);  $^1\text{H}$  NMR (400 MHz,  $\text{CDCl}_3$ )  $\delta$  8.46 (br s, 1H), 7.81-7.76 (m, 2H), 7.71-7.69 (m, 2H), 7.30-7.28 (m, 2H), 7.23-7.20 (m, 2H), 7.14-7.12 (m, 1H), 6.69-6.65 (m, 2H), 5.83 (d,  $J = 12.4$  Hz, 1H), 5.19 (d,  $J = 12.4$  Hz, 1H), 3.63 (s, 3H), 2.25 (s, 3H), 2.20 (s, 3H);  $^{13}\text{C}$  NMR (150 MHz,  $\text{CDCl}_3$ )  $\delta$  165.5, 158.5, 137.7, 136.7, 136.4, 134.5, 131.9, 131.0, 130.6, 129.1, 128.5, 125.0, 123.8, 114.2, 58.9, 55.1, 49.8, 19.9, 19.4; HRMS (ESI-TOF) Calcd for  $\text{C}_{33}\text{H}_{24}\text{F}_7\text{N}_2\text{O}_4$   $[\text{M}+\text{H}]^+$ : 645.1619; found: 645.1622.

**Figure S1.** X-ray Crystallographic Data of **7f**

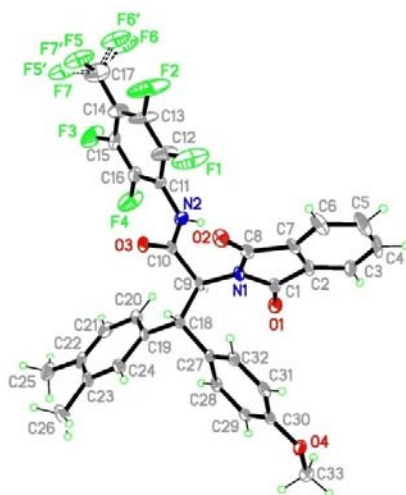

**Table S4: Crystal Data and Structure Refinement for 7f**

CCDC-985675

|                      |                          |                             |
|----------------------|--------------------------|-----------------------------|
| Identification code  | <b>7f</b>                |                             |
| Empirical formula    | $C_{33}H_{23}F_7N_2O_4$  |                             |
| Molecular formula    | $C_{33}H_{23}F_7N_2O_4$  |                             |
| Formula weight       | 644.53                   |                             |
| Temperature          | 100(2) K                 |                             |
| Wavelength           | 0.71073 Å                |                             |
| Crystal system       | Monoclinic               |                             |
| Space group          | C2                       |                             |
| Unit cell dimensions | $a = 47.544(18)$ Å       | $\alpha = 90^\circ$ .       |
|                      | $b = 5.5459(19)$ Å       | $\beta = 92.544(9)^\circ$ . |
|                      | $c = 21.860(7)$ Å        | $\gamma = 90^\circ$ .       |
| Volume               | $5758(3)$ Å <sup>3</sup> |                             |

|                                   |                                             |
|-----------------------------------|---------------------------------------------|
| Z                                 | 8                                           |
| Density (calculated)              | 1.487 Mg/m <sup>3</sup>                     |
| Absorption coefficient            | 0.128 mm <sup>-1</sup>                      |
| F(000)                            | 2640                                        |
| Crystal size                      | 0.18 x 0.05 x 0.02 mm <sup>3</sup>          |
| Crystal color, habit              | colourless PLATE                            |
| Theta range for data collection   | 1.71 to 25.71°.                             |
| Index ranges                      | -50<=h<=58, -6<=k<=6, -26<=l<=26            |
| Reflections collected             | 18316                                       |
| Independent reflections           | 10714 [R(int) = 0.0343]                     |
| Completeness to theta = 25.00°    | 99.8 %                                      |
| Absorption correction             | multi-scan / sadabs                         |
| Max. and min. transmission        | 0.9974 and 0.9773                           |
| Refinement method                 | Full-matrix least-squares on F <sup>2</sup> |
| Data / restraints / parameters    | 10714 / 35 / 954                            |
| Goodness-of-fit on F <sup>2</sup> | 1.005                                       |
| Final R indices [I>2sigma(I)]     | R1 = 0.0597, wR2 = 0.1179                   |
| R indices (all data)              | R1 = 0.1199, wR2 = 0.1407                   |
| Absolute structure parameter      | -1.2(8)                                     |
| Largest diff. peak and hole       | 0.314 and -0.371 e.Å <sup>-3</sup>          |



## E. Ligand-Enabled C(sp<sup>3</sup>)-H Arylation with Heteroaryl Iodides

### General Procedure Scheme D

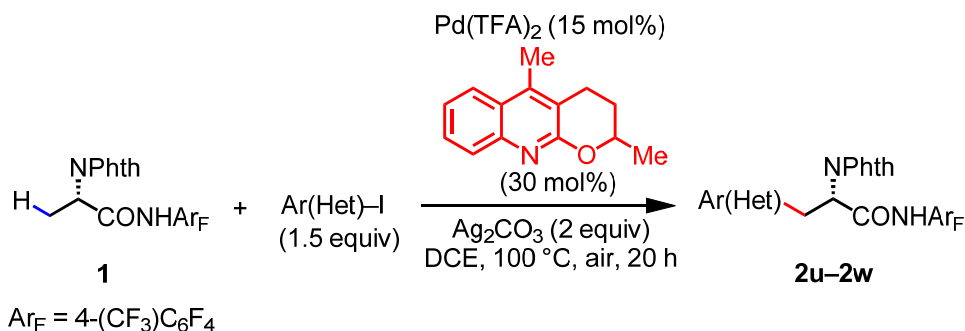

**General Arylation Procedure D:** Substrate **1** (0.1 mmol), Pd(TFA)<sub>2</sub> (0.015 mmol, 5.0 mg), **L10** (0.03 mmol, 6.5 mg) and Ag<sub>2</sub>CO<sub>3</sub> (0.2 mmol, 55 mg) were weighed out open to air and placed in a microwave tube (5 mL) with a magnetic stir bar. The heteroaryl iodide (0.15 mmol) and DCE (0.5 mL) were added. The reaction vessel was sealed and the mixture was first stirred at room temperature for 10 min and then heated to 100 °C for 20 hours with vigorous stirring. Upon completion, the reaction mixture was cooled to room temperature. The solvents were removed under reduced pressure and the resulting mixture was purified by a silica gel-packed flash chromatography column using hexane/EtOAc as the eluent.

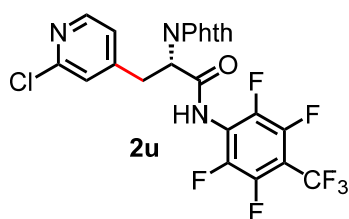

### (S)-3-(2-Chloropyridin-4-yl)-2-phthalimido-N-(2,3,5,6-tetrafluoro-4-(trifluoromethyl)phenyl)propanamide (**2u**)

Substrate **1** was arylated following the general arylation procedure D. Analysis of crude reaction mixture by <sup>1</sup>H NMR showed a > 20:1 ratio of mono- and diarylated products. After purification by column chromatography using hexane/EtOAc (4/1) as the eluent, **2u** was obtained as a white solid (29.8 mg, 55%). <sup>1</sup>H NMR (400 MHz, CDCl<sub>3</sub>) δ 8.54 (br s, 1H),

8.21-8.20 (m, 1H), 7.85-7.80 (m, 2H), 7.79-7.74 (m, 2H), 7.17-7.16 (m, 1H), 7.09-7.07 (m, 1H), 5.35 (dd,  $J_1 = 6.4$  Hz,  $J_2 = 10.4$  Hz, 1H), 3.66 (ABqd,  $J_1 = 6.4$  Hz,  $J_2 = 14.4$  Hz, 1H), 3.59 (ABqd,  $J_1 = 10.4$  Hz,  $J_2 = 14.4$  Hz, 1H);  $^{13}\text{C}$  NMR (100 MHz,  $\text{CDCl}_3$ )  $\delta$  167.6, 165.8, 152.0, 149.9, 148.4, 135.0, 130.8, 124.7, 124.1, 122.8, 54.5, 34.0; HRMS (ESI-TOF) Calcd for  $\text{C}_{23}\text{H}_{12}\text{ClF}_7\text{N}_3\text{O}_3$   $[\text{M}+\text{H}]^+$ : 546.0450; found: 546.0451.

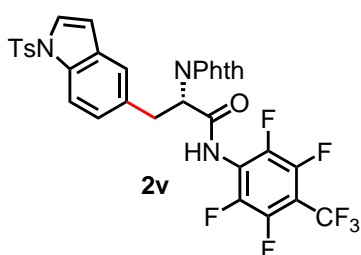

**(S)-2-Phthalimido-*N*-(2,3,5,6-tetrafluoro-4-(trifluoromethyl)phenyl)-3-(1-tosyl-1*H*-indol-5-yl)propanamide (2v)**

Substrate **1** was arylated following the general arylation procedure D. Analysis of crude reaction mixture by  $^1\text{H}$  NMR showed a 12:1 ratio of mono- and diarylated products. After purification by column chromatography using hexane/EtOAc (3/1) as the eluent, **2v** was obtained as a white solid (45.5 mg, 65%).  $^1\text{H}$  NMR (600 MHz,  $\text{CDCl}_3$ )  $\delta$  8.40 (br s, 1H), 7.81 (d,  $J = 8.4$  Hz, 1H), 7.79-7.76 (m, 2H), 7.72-7.70 (m, 2H), 7.68 (d,  $J = 8.4$  Hz, 2H), 7.46 (d,  $J = 3.6$  Hz, 1H), 7.37-7.36 (m, 1H), 7.18 (d,  $J = 7.8$  Hz, 2H), 7.14-7.13 (m, 1H), 6.50 (d,  $J = 3.6$  Hz, 1H), 5.35 (dd,  $J_1 = 6.6$  Hz,  $J_2 = 10.2$  Hz, 1H), 3.70 (ABqd,  $J_1 = 6.6$  Hz,  $J_2 = 14.4$  Hz, 1H), 3.61 (ABqd,  $J_1 = 10.2$  Hz,  $J_2 = 14.4$  Hz, 1H), 2.32 (s, 3H);  $^{13}\text{C}$  NMR (150 MHz,  $\text{CDCl}_3$ )  $\delta$  168.1, 166.6, 145.0, 135.1, 134.7, 134.0, 131.2, 131.0, 130.5, 129.8, 126.9, 126.7, 125.3, 123.9, 121.7, 113.9, 108.8, 56.7, 35.1, 21.5; HRMS (ESI-TOF) Calcd for  $\text{C}_{33}\text{H}_{21}\text{F}_7\text{N}_3\text{O}_5\text{S}$   $[\text{M}+\text{H}]^+$ : 704.1085; found: 704.1085.

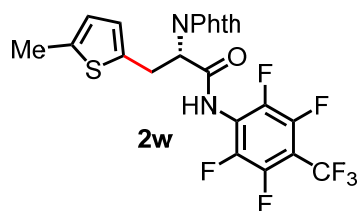

**(S)-3-(5-Methylthiophen-2-yl)-2-phthalimido-N-(2,3,5,6-tetrafluoro-4-(trifluoromethyl)phenyl)propanamide (2w)**

Substrate **1** was arylated following the general arylation procedure D. Analysis of crude reaction mixture by  $^1\text{H}$  NMR showed > 20:1 ratio of mono- and diarylated products. After purification by column chromatography using hexane/EtOAc (4/1) as the eluent, **2w** was obtained as a white solid (38.3 mg, 72%).  $^1\text{H}$  NMR (400 MHz,  $\text{CDCl}_3$ )  $\delta$  8.37 (br s, 1H), 7.88-7.84 (m, 2H), 7.79-7.74 (m, 2H), 6.63 (d,  $J = 3.6$  Hz, 1H), 6.47-6.46 (m, 1H), 5.35 (t,  $J = 8.0$  Hz, 1H), 3.66 (d,  $J = 8.0$  Hz, 2H), 2.34 (s, 3H);  $^{13}\text{C}$  NMR (100 MHz,  $\text{CDCl}_3$ )  $\delta$  168.0, 166.2, 139.9, 135.0, 134.7, 131.2, 126.8, 125.1, 123.9, 56.4, 29.7, 15.3; HRMS (ESI-TOF) Calcd for  $\text{C}_{23}\text{H}_{14}\text{F}_7\text{N}_2\text{O}_3\text{S}$   $[\text{M}+\text{H}]^+$ : 531.0608; found: 531.0606.

## F. Auxiliary Cleavage

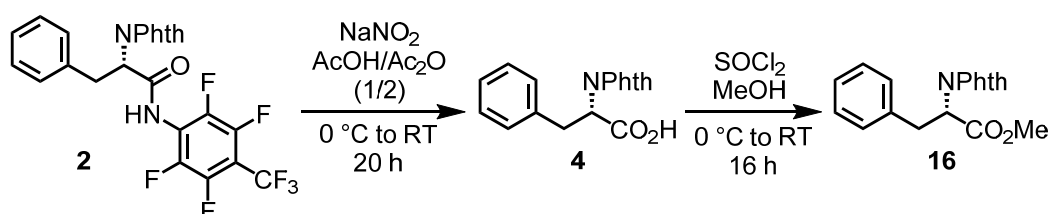

The mono-arylated product **2** (153mg, 0.3 mmol) was dissolved in the mixed solvents (3 mL,  $\text{AcOH}/\text{Ac}_2\text{O} = 1/2$ ), and then cooled to  $0\text{ }^\circ\text{C}$ .  $\text{NaNO}_2$  (414 mg, 6 mmol) was slowly added into the reaction mixture in portions. The reaction mixture was first stirred at  $0\text{ }^\circ\text{C}$  for 3 hours and then at room temperature for 17 hours. Upon completion, the solvents were removed under reduced pressure, and the mixture was neutralized by slow addition of saturated  $\text{NaHCO}_3$  solution to pH 8. The aqueous phase was extracted with ether ( $4 \times 10$  mL), and then carefully acidified with cold  $\text{HCl}$  solution (1 N) to pH 2, and then extracted with ether ( $4 \times 20$  mL). The combined organic layers were washed with brine, dried over anhydrous  $\text{Na}_2\text{SO}_4$ , filtered and concentrated *in vacuo* to afford the desired product **4** (84.5 mg, 95%) (28).  $^1\text{H}$  NMR (400 MHz,  $\text{CDCl}_3$ )  $\delta$  8.11 (br s, 1H), 7.80-7.75 (m, 2H), 7.70-7.65 (m, 2H), 7.21-7.11 (m, 5H), 5.22 (dd,  $J_1 = 7.6$  Hz,  $J_2 = 8.8$  Hz, 1H), 3.60-3.58 (m, 2H).

To a solution of **4** (29.5 mg, 0.1 mmol) in anhydrous methanol (5 mL) was added thionyl chloride (44  $\mu\text{L}$ , 0.6 mmol) dropwise at  $0\text{ }^\circ\text{C}$ . The solution was stirred overnight at room temperature. After concentration, the mixture was purified by column chromatography using hexane/ $\text{EtOAc}$  (5/1) as the eluent, and the product **16** was obtained as white solid (27.8 mg, 90%, 97% ee) (29). The ee value was determined by HPLC analysis on a Chiralcel OJ column (25% isopropanol/hexanes, 0.5 mL/min) with  $t_r = 28.1$  min (major), 43.3 min (minor).  $^1\text{H}$  NMR (400 MHz,  $\text{CDCl}_3$ )  $\delta$  7.80-7.76 (m, 2H), 7.71-7.66 (m, 2H), 7.21-7.11 (m, 5H), 5.16 (dd,  $J_1 = 5.2$  Hz,  $J_2 = 11.2$  Hz, 1H), 3.78 (s, 3H), 3.60 (ABqd,  $J_1 = 5.2$  Hz,  $J_2 = 14.4$  Hz, 1H), 3.54 (ABqd,  $J_1 = 11.2$  Hz,  $J_2 = 14.4$  Hz, 1H).

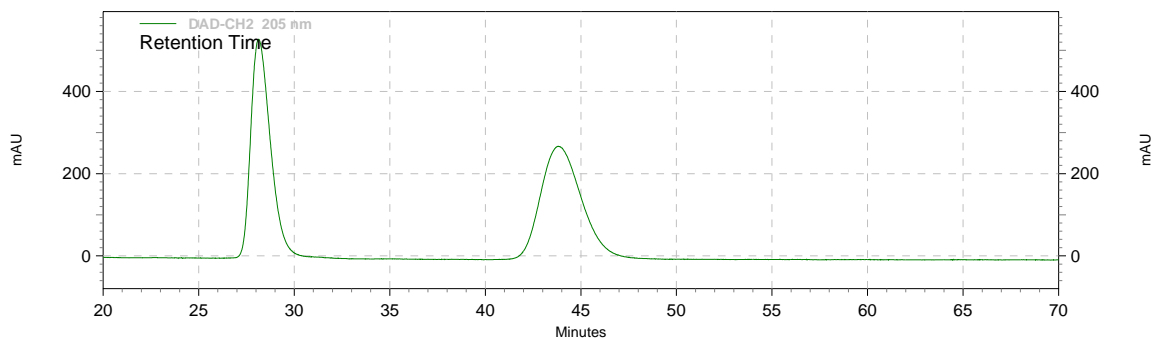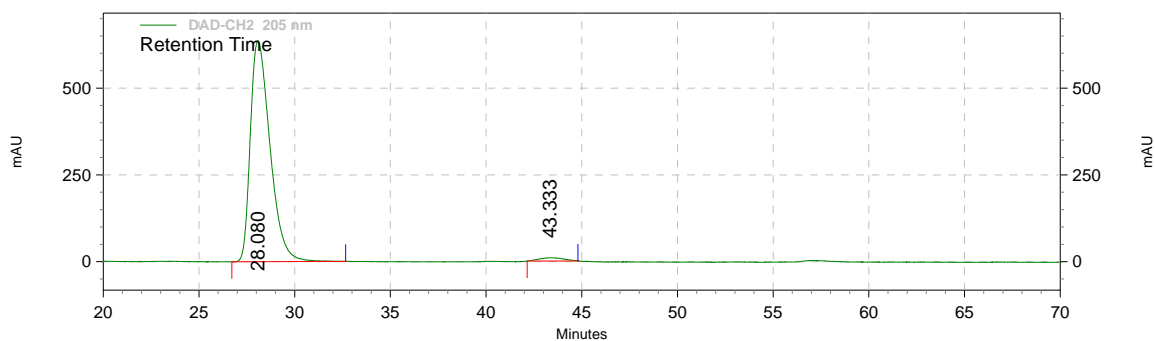

**DAD-CH2 205 nm Results**

| Retention Time | Area      | Area % | Height  | Height % |
|----------------|-----------|--------|---------|----------|
| 28.080         | 275406923 | 98.45  | 3486673 | 98.39    |
| 43.333         | 4336862   | 1.55   | 56903   | 1.61     |
| Totals         | 279743785 | 100.00 | 3543576 | 100.00   |

## G. Synthesis of *N*-Boc-Protected Unnatural Amino Acid Derivatives via C(sp<sup>3</sup>)-H Olefination

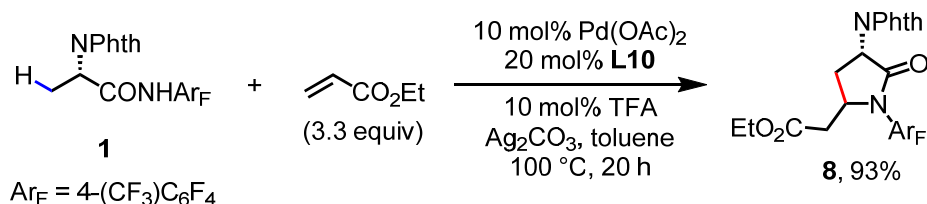

Substrate **1** (0.1 mmol, 43.4 mg), Pd(OAc)<sub>2</sub> (0.01 mmol, 2.3 mg), **L10** (0.02 mmol, 4.3 mg), and Ag<sub>2</sub>CO<sub>3</sub> (0.15 mmol, 41.4 mg) were weighed out open to air and placed in a microwave tube (5 mL) with a magnetic stir bar. Ethyl acrylate (0.33 mmol, 35 μL), TFA (0.01 mmol, 1 μL), and toluene (0.5 mL) were added. The reaction vessel was sealed and the mixture was first stirred at room temperature for 10 min and then heated to 100 °C for 20 hours with vigorous stirring. Upon completion, the reaction mixture was cooled to room temperature. The solvents were removed under reduced pressure and the resulting mixture was purified by a silica gel-packed flash chromatography column using toluene/Et<sub>2</sub>O (5/1) as the eluent.

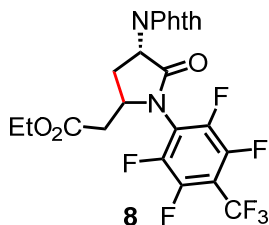

### Ethyl 2-((4*S*)-5-oxo-4-phthalimido-1-(2,3,5,6-tetrafluoro-4-(trifluoromethyl)phenyl)pyrrolidin-2-yl)acetate (**8**)

Analysis of crude reaction mixture by <sup>1</sup>H NMR showed a 2.2:1 average diastereomer ratio. After purification, **8** was obtained as a white solid (49.6 mg, 93%). <sup>1</sup>H NMR (400 MHz, CDCl<sub>3</sub>) δ 7.91-7.85 (m, 2H), 7.79-7.75 (m, 2H), 5.36-5.20 (m, 1H), 4.80-4.60 (m, 1H), 4.13-4.04 (m, 2H), 3.06-2.93 (m, 1H), 2.77-2.63 (m, 2H), 2.60-2.41 (m, 1H), 1.25-1.19 (m, 3H); <sup>13</sup>C NMR (100 MHz, CDCl<sub>3</sub>) δ 169.4, 169.2, 169.1, 168.9, 167.1, 167.0, 134.4, 131.6,

123.7, 61.2, 54.1, 53.2, 48.6, 47.7, 39.2, 38.6, 31.2, 30.3, 13.91, 13.89; HRMS (ESI-TOF) Calcd for C<sub>23</sub>H<sub>16</sub>F<sub>7</sub>N<sub>2</sub>O<sub>5</sub> [M+H]<sup>+</sup>: 533.0942; found: 533.0941.

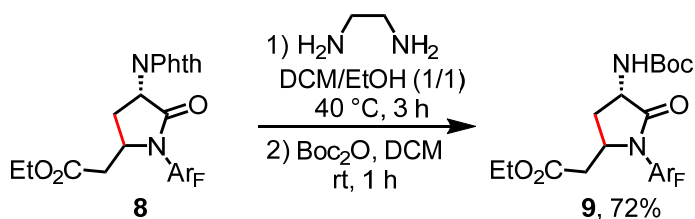

Substrate **8** (0.5 mmol, 266 mg) was weighed and placed in a round-bottom flask (25 mL) with a magnetic stir bar. DCM (1.5 mL), EtOH (1.5 mL), and ethylenediamine (2.5 mmol, 0.17 mL) were added. The reaction vessel was capped and the mixture was heated to 40 °C for 3 hours with vigorous stirring. Upon completion, the solvents were removed under reduced pressure. CuCl<sub>2</sub> (1.25 mmol, 168 mg) and deionized water (15 mL) were added into the resulting mixture. The aqueous solution was extracted with EtOAc (3 × 20 mL). The organic layer was washed with brine, dried over anhydrous Na<sub>2</sub>SO<sub>4</sub>, filtered, and concentrated. The residue was dissolved in DCM (1.5 mL) without purification, and di-*t*-butyl dicarbonate (1.5 mmol, 0.35 mL) was added in the solution. The solvent was removed after one-hour reaction, and the mixture was purified by a silica gel-packed flash chromatography column using hexane/EtOAc (4/1 to 3/1) as the eluent.

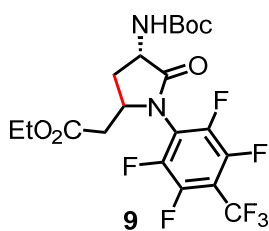

**Ethyl 2-((4S)-4-((*t*-butoxycarbonyl)amino)-5-oxo-1-(2,3,5,6-tetrafluoro-4-(trifluoromethyl)phenyl)pyrrolidin-2-yl)acetate (**9**)**

After purification, **9** was obtained as a white solid (181 mg, 72%). <sup>1</sup>H NMR (400 MHz, CDCl<sub>3</sub>) δ 5.27-5.16 (m, 1H), 4.62-4.44 (m, 2H), 4.08-4.00 (m, 2H), 3.15-3.07 and 2.72-

2.66 (m, 1H), 2.63-2.60 (m, 1H), 2.57-2.43 and 2.00-1.92 (m, 2H), 1.471-1.465 (m, 9H), 1.22-1.17 (m, 3H);  $^{13}\text{C}$  NMR (150 MHz,  $\text{CDCl}_3$ )  $\delta$  171.9, 169.6, 169.1, 155.6, 155.5, 80.5, 80.4, 61.24, 61.22, 54.2, 53.4, 51.7, 50.1, 38.8, 38.5, 35.1, 34.2, 28.2, 13.9; HRMS (ESI-TOF) Calcd for  $\text{C}_{20}\text{H}_{22}\text{F}_7\text{N}_2\text{O}_5$   $[\text{M}+\text{H}]^+$ : 503.1411; found: 503.1415.

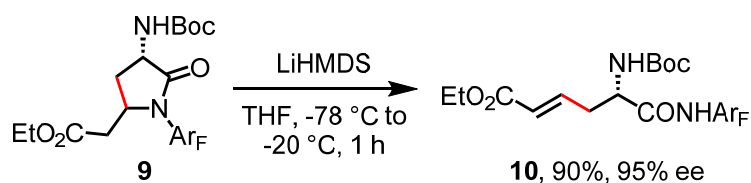

To a dried Schlenk tube (50 mL) equipped with a magnetic stir bar were added lactam **9** (50.2 mg, 0.1 mmol) and 1 mL of anhydrous THF. After cooling to  $-78^\circ\text{C}$ , LiHMDS (0.5 M in 2-methyltetrahydrofuran, 0.5 mL, 0.5 mmol) was added dropwise within 5 minutes. The mixture was warmed up to  $-20^\circ\text{C}$  naturally in one hour. The reaction was then quenched with saturated  $\text{NH}_4\text{Cl}/\text{AcOH}$  (v/v = 20/1) at  $-78^\circ\text{C}$  and extracted with EtOAc ( $3 \times 6$  mL). The combined organic layer was washed with brine and dried over anhydrous  $\text{MgSO}_4$ , filtrated and concentrated. The crude product was purified by a silica gel-packed flash chromatography column using DCM/EtOAc (10/1) as the eluent.

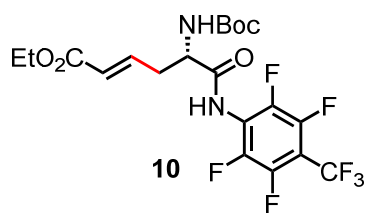

**Ethyl (S,E)-5-((t-butoxycarbonyl)amino)-6-oxo-6-((2,3,5,6-tetrafluoro-4-(trifluoromethyl)phenyl)amino)hex-2-enoate (**10**)**

After purification, **10** was obtained as a white solid (45.2 mg, 90%, 95% ee). The ee value was determined by HPLC analysis on a Chiralpak AD-H column (20% isopropanol/hexanes, 0.2 mL/min) with  $t_r = 28.1$  min (minor), 34.5 min (major).  $^1\text{H}$  NMR (400 MHz,  $\text{CDCl}_3$ )  $\delta$  8.92 (br s, 1H), 6.97-6.89 (m, 1H), 5.98 (d,  $J = 16.0$  Hz, 1H), 5.25-



5.12 (m, 1H), 4.56-4.44 (m, 1H), 4.20 (q,  $J = 7.2$  Hz, 2H), 2.86-2.79 (m, 1H), 2.76-2.68 (m, 1H), 1.47 (s, 9H), 1.29 (t,  $J = 7.2$  Hz, 3H);  $^{13}\text{C}$  NMR (150 MHz,  $\text{CDCl}_3$ )  $\delta$  169.1, 165.8, 156.5, 141.9, 125.5, 81.8, 60.6, 53.3, 33.5, 28.2, 14.2; HRMS (ESI-TOF) Calcd for  $\text{C}_{20}\text{H}_{21}\text{F}_7\text{N}_2\text{O}_5\text{Na}$   $[\text{M}+\text{Na}]^+$ : 525.1231; found: 525.1231.

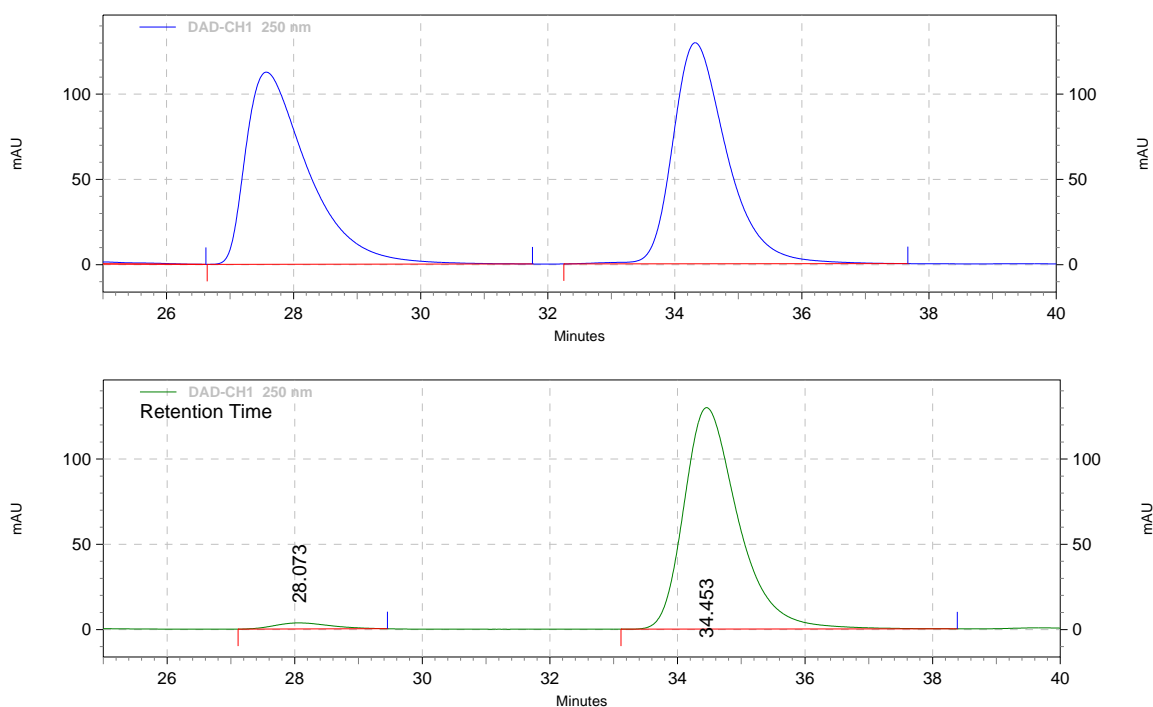

#### DAD-CH1 250 nm Results

| Retention Time | Area      | Area % | Height  | Height % |
|----------------|-----------|--------|---------|----------|
| 28.073         | 3493348   | 2.36   | 66710   | 2.57     |
| 34.453         | 144495133 | 97.64  | 2527818 | 97.43    |
| Totals         | 147988481 | 100.00 | 2594528 | 100.00   |

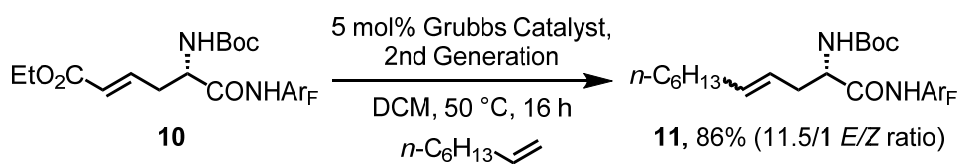

To a dried Schlenk tube (25 mL) were added Grubbs Catalyst, 2nd Generation (2.8 mg, 0.0035 mmol), amide **10** (35.1 mg, 0.07 mmol), DCM (1.5 mL), and 1-octene (71.5 mg, d = 0.715 g/mL, 0.1 mL, 0.64 mmol). The mixture refluxed under N<sub>2</sub> atmosphere (oil bath, 50 °C) for 16 h. The mixture was filtered through a small pad of Celite. The solvents were removed under reduced pressure and the resulting mixture was purified by preparative TLC using hexane/EtOAc (5/1) as the eluent to afford product **11** as colorless oil (31.0 mg, 86%).

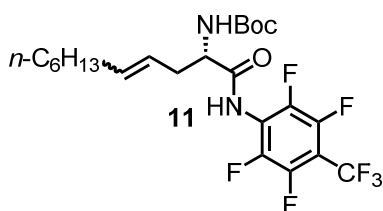

***t*-Butyl (S)-1-oxo-1-((2,3,5,6-tetrafluoro-4-(trifluoromethyl)phenyl)amino)undec-4-en-2-yl)carbamate (**11**)**

<sup>1</sup>H NMR (400 MHz, CDCl<sub>3</sub>) δ 8.85 (br s, 1H), 5.96-5.89 and 5.66-5.59 (m, 1H), 5.51-5.34 (m, 1H), 5.22-5.04 (m, 1H), 4.38 (br s, 1H), 2.74-2.49 (m, 2H), 2.09-1.97 (m, 2H), 1.46 (s, 9H), 1.35-1.27 (m, 8H), 0.88 (t, *J* = 6.6 Hz, 3H); <sup>13</sup>C NMR (150 MHz, CDCl<sub>3</sub>) δ 169.9, 156.5, 136.4, 123.2, 81.3, 54.1, 34.5, 32.5, 31.7, 29.2, 28.8, 28.2, 22.6, 14.1; HRMS (ESI-TOF) Calcd for C<sub>23</sub>H<sub>30</sub>F<sub>7</sub>N<sub>2</sub>O<sub>3</sub> [M+H]<sup>+</sup>: 515.2139; found: 515.2137.

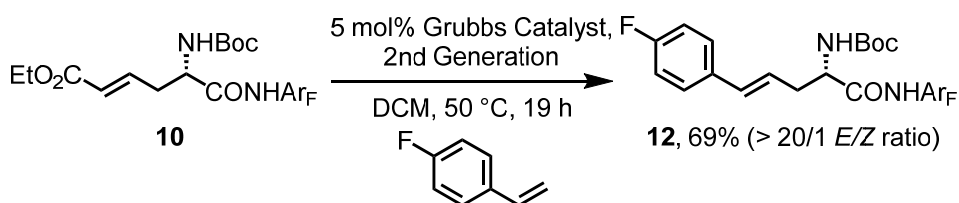

The reaction of Grubbs Catalyst, 2nd Generation (2.8 mg, 0.0035 mmol), amide **10** (35.3 mg, 0.07 mmol), DCM (1.5 mL), and 4-fluorostyrene (153.6 mg, d = 1.024 g/mL, 0.15 mL, 0.80 mmol) afforded **12** as a white solid (25.3 mg, 69%).

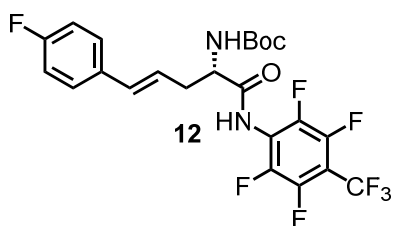

***t*-Butyl (S,E)-(5-(4-fluorophenyl)-1-oxo-1-((2,3,5,6-tetrafluoro-4-(trifluoromethyl)phenyl)amino)pent-4-en-2-yl)carbamate (**12**)**

$^1\text{H}$  NMR (600 MHz,  $\text{CDCl}_3$ )  $\delta$  8.87 (br s, 1H), 7.34-7.29 (m, 2H), 7.02-6.97 (m, 2H), 6.50 (d,  $J = 15.6$  Hz, 1H), 6.11 (dt,  $J_1 = 7.2$  Hz,  $J_2 = 15.6$  Hz, 1H), 5.19 (d,  $J = 7.8$  Hz, 1H), 4.51 (br s, 1H), 2.79-2.72 (m, 2H), 1.43 (s, 9H);  $^{13}\text{C}$  NMR (150 MHz,  $\text{CDCl}_3$ )  $\delta$  169.7, 162.4 (d,  $J_{\text{FC}} = 245.7$  Hz), 156.5, 133.5, 132.7, 127.8 (d,  $J_{\text{FC}} = 8.0$  Hz), 123.1, 115.5 (d,  $J_{\text{FC}} = 21.5$  Hz), 81.6, 54.1, 34.8, 28.2; HRMS (ESI-TOF) Calcd for  $\text{C}_{23}\text{H}_{20}\text{F}_8\text{N}_2\text{O}_3\text{Na}$   $[\text{M}+\text{Na}]^+$ : 547.1238; found: 547.1234.

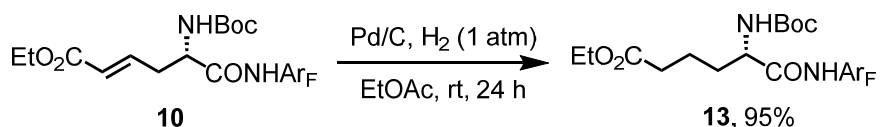

To a round-bottom flask (25 mL) was added Pd/C (10 wt. % loading on carbon, 5.0 mg), amide **10** (35.2 mg, 0.07 mmol), and EtOAc (1 mL). The reaction tube was evacuated and back-filled with  $\text{H}_2$  (3 times, balloon). After stirring at room temperature for 24 hours, the mixture was filtered through a small pad of Celite. The solvents were removed under reduced pressure and the resulting mixture was purified by preparative TLC using hexane/EtOAc (3/1) as the eluent to afford **13** as colorless oil (33.4 mg, 95%).

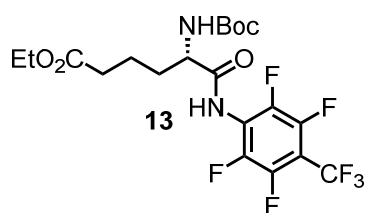

**Ethyl (S)-5-((*t*-butoxycarbonyl)amino)-6-oxo-6-((2,3,5,6-tetrafluoro-4-(trifluoromethyl)phenyl)amino)hexanoate (**13**)**

$^1\text{H}$  NMR (400 MHz,  $\text{CDCl}_3$ )  $\delta$  8.96 (br s, 1H), 5.24 (br s, 1H), 4.33 (br s, 1H), 4.15 (q,  $J = 7.2$  Hz, 2H), 2.48-2.35 (m, 2H), 2.04-1.93 (m, 1H), 1.87-1.76 (m, 3H), 1.47 (s, 9H), 1.27 (t,  $J = 7.2$  Hz, 3H);  $^{13}\text{C}$  NMR (150 MHz,  $\text{CDCl}_3$ )  $\delta$  173.5, 170.0, 156.6, 81.3, 60.7, 54.1, 33.4, 30.4, 28.2, 20.7, 14.2; HRMS (ESI-TOF) Calcd for  $\text{C}_{20}\text{H}_{24}\text{F}_7\text{N}_2\text{O}_5$   $[\text{M}+\text{H}]^+$ : 505.1568; found: 505.1567.

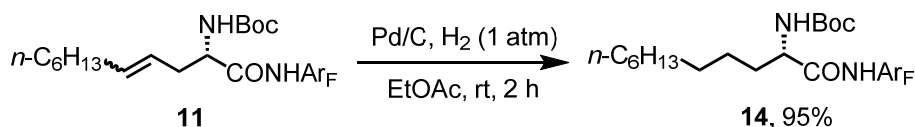

The reaction of Pd/C (10 wt. % loading on carbon, 5.0 mg), amide **11** (31.0 mg), and EtOAc (1 mL) afforded **14** as colorless oil (29.5 mg, 95%).

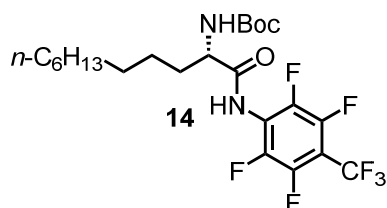

***t*-Butyl (S)-1-oxo-1-((2,3,5,6-tetrafluoro-4-(trifluoromethyl)phenyl)amino)undecan-2-yl)carbamate (**14**)**

$^1\text{H}$  NMR (600 MHz,  $\text{CDCl}_3$ )  $\delta$  9.00 (br s, 1H), 5.22-5.20 (m, 1H), 4.38-4.37 (m, 1H), 1.95-1.89 (m, 1H), 1.75-1.66 (m, 1H), 1.45-1.40 (m, 11H), 1.34-1.26 (m, 12H), 0.88 (t,  $J = 6.9$  Hz, 3H);  $^{13}\text{C}$  NMR (150 MHz,  $\text{CDCl}_3$ )  $\delta$  170.6, 156.6, 81.2, 54.6, 31.8, 31.5, 29.44, 29.38,

29.2, 28.2, 25.6, 22.7, 14.1; HRMS (ESI-TOF) Calcd for C<sub>23</sub>H<sub>31</sub>F<sub>7</sub>N<sub>2</sub>O<sub>3</sub>Na [M+Na]<sup>+</sup>: 539.2115; found: 539.2111.

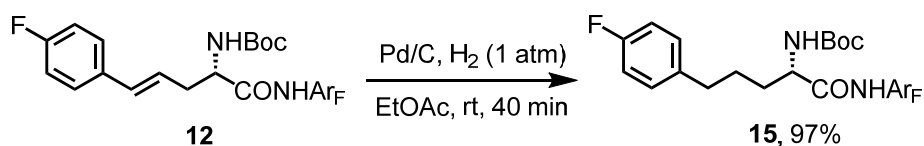

The reaction of Pd/C (10 wt. % loading on carbon, 5.0 mg), amide **12** (25.3 mg), and EtOAc (1 mL) afforded **15** as colorless oil (24.6 mg, 97%).

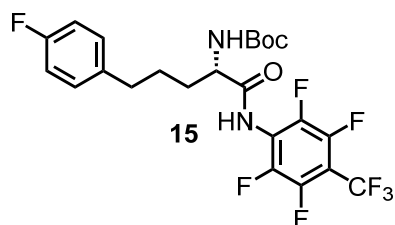

***t*-Butyl (S)-(5-(4-fluorophenyl)-1-oxo-1-((2,3,5,6-tetrafluoro-4-(trifluoromethyl)phenyl)amino)pentan-2-yl)carbamate (**15**)**

<sup>1</sup>H NMR (600 MHz, CDCl<sub>3</sub>) δ 8.88 (br s, 1H), 7.13-7.10 (m, 2H), 6.98-6.94 (m, 2H), 5.14-5.12 (m, 1H), 4.36 (br s, 1H), 2.69-2.59 (m, 2H), 2.00-1.94 (m, 1H), 1.76-1.70 (m, 3H), 1.44 (s, 9H); <sup>13</sup>C NMR (150 MHz, CDCl<sub>3</sub>) δ 170.2, 161.3 (d, *J*<sub>FC</sub> = 242.3 Hz), 156.6, 136.9 (d, *J*<sub>FC</sub> = 3.5 Hz), 129.6 (d, *J*<sub>FC</sub> = 7.7 Hz), 115.2 (d, *J*<sub>FC</sub> = 21.0 Hz), 81.4, 54.4, 34.5, 30.6, 28.2, 27.5; HRMS (ESI-TOF) Calcd for C<sub>23</sub>H<sub>22</sub>F<sub>8</sub>N<sub>2</sub>O<sub>3</sub>Na [M+Na]<sup>+</sup>: 549.1395; found: 549.1394.

## H. Synthesis and Reactivity of Palladacycle Intermediates in C(sp<sup>3</sup>)-H Arylation

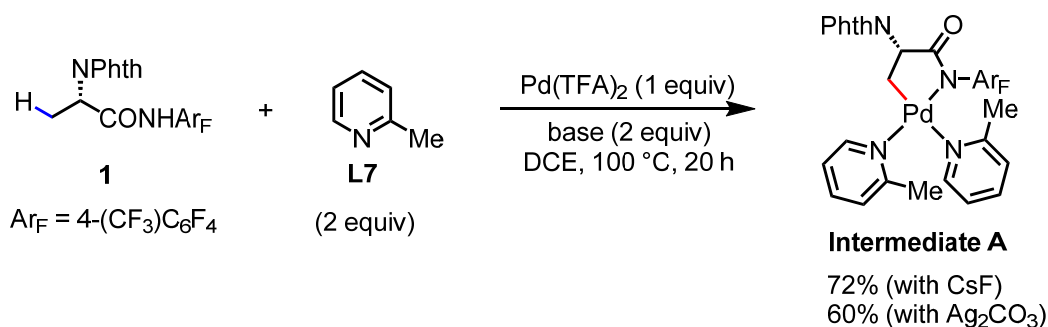

In a sealable tube (20 mL), amide **1** (43.4 mg, 0.10 mmol), Pd(TFA)<sub>2</sub> (33.2 mg, 0.10 mmol), 2-picoline (18.6 mg, 0.2 mmol), and CsF (30.4 mg, 0.20 mmol) were dissolved in DCE (2 mL). The reaction mixture was then tightly capped and stirred for 10 minutes at room temperature, and then heated up to 100 °C with vigorous stirring for 20 hours. The reaction mixture was then cooled to room temperature, and filtered through a small pad of Celite. The residue was purified by preparative TLC using hexane/EtOAc (1/2) as the eluent to afford **Intermediate A** as a yellow solid (52.0 mg, 72%). HRMS (ESI-TOF) Calcd for C<sub>30</sub>H<sub>22</sub>F<sub>7</sub>N<sub>4</sub>O<sub>3</sub>Pd [M+H]<sup>+</sup>: 725.0609; found: 725.0621. **Intermediate A** was recrystallized in DCM/hexane, and the structure was determined by X-ray diffraction.

**Figure S2.** X-ray Crystallographic Data of **Intermediate A**

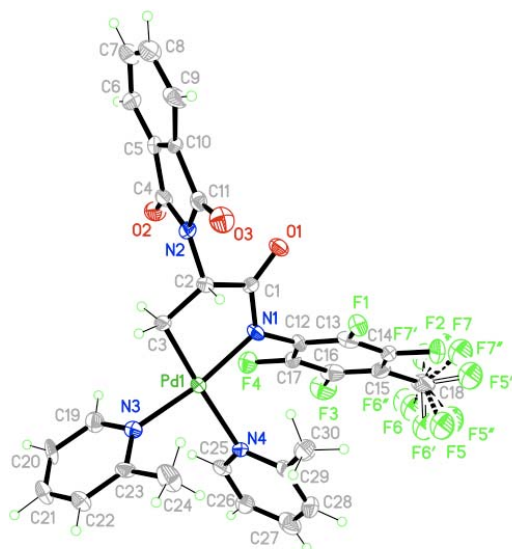

**Table S5: Crystal Data and Structure Refinement for Intermediate A**

CCDC-985676

|                      |                                     |                               |
|----------------------|-------------------------------------|-------------------------------|
| Identification code  | <b>Intermediate A</b>               |                               |
| Empirical formula    | $C_{31}H_{23}Cl_2F_7N_4O_3Pd$       |                               |
| Molecular formula    | $C_{30}H_{21}F_7N_4O_3Pd, CH_2Cl_2$ |                               |
| Formula weight       | 809.83                              |                               |
| Temperature          | 200(2) K                            |                               |
| Wavelength           | 0.71073 Å                           |                               |
| Crystal system       | Triclinic                           |                               |
| Space group          | P1                                  |                               |
| Unit cell dimensions | $a = 10.9436(12)$ Å                 | $\alpha = 110.701(3)^\circ$ . |
|                      | $b = 12.9351(14)$ Å                 | $\beta = 108.032(3)^\circ$ .  |
|                      | $c = 13.8591(16)$ Å                 | $\gamma = 103.155(3)^\circ$ . |
| Volume               | $1614.9(3)$ Å <sup>3</sup>          |                               |
| Z                    | 2                                   |                               |
| Density (calculated) | 1.665 Mg/m <sup>3</sup>             |                               |

|                                   |                                             |
|-----------------------------------|---------------------------------------------|
| Absorption coefficient            | 0.820 mm <sup>-1</sup>                      |
| F(000)                            | 808                                         |
| Crystal size                      | 0.28 × 0.12 × 0.10 mm <sup>3</sup>          |
| Crystal color, habit              | COLORLESS BLOCK                             |
| Theta range for data collection   | 1.74 to 26.43°.                             |
| Index ranges                      | -13<=h<=13, -16<=k<=16, -17<=l<=16          |
| Reflections collected             | 14965                                       |
| Independent reflections           | 9256 [R(int) = 0.0366]                      |
| Completeness to theta = 25.00°    | 99.9 %                                      |
| Absorption correction             | multi-scan / sadabs                         |
| Max. and min. transmission        | 0.9225 and 0.8029                           |
| Refinement method                 | Full-matrix least-squares on F <sup>2</sup> |
| Data / restraints / parameters    | 9256 / 94 / 876                             |
| Goodness-of-fit on F <sup>2</sup> | 1.038                                       |
| Final R indices [I>2sigma(I)]     | R1 = 0.0417, wR2 = 0.0927                   |
| R indices (all data)              | R1 = 0.0592, wR2 = 0.0986                   |
| Absolute structure parameter      | -0.01(2)                                    |
| Largest diff. peak and hole       | 1.240 and -0.704 e.Å <sup>-3</sup>          |



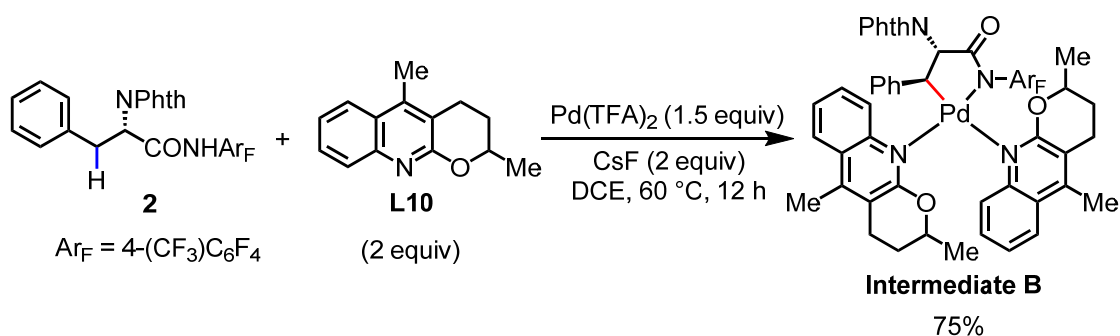

In a sealable tube (20 mL), amide **1** (43.4 mg, 0.10 mmol), Pd(TFA)<sub>2</sub> (49.8 mg, 0.15 mmol), L10 (42.6 mg, 0.20 mmol), and CsF (30.4 mg, 0.20 mmol) were dissolved in DCE (2 mL). The reaction mixture was then tightly capped and stirred for 10 minutes at room temperature, and then heated up to 60 °C with vigorous stirring for 12 hours. The reaction mixture was then cooled to room temperature, and filtered through a small pad of Celite. The residue was purified by preparative TLC using hexane/EtOAc (1/2) as the eluent to afford **Intermediate B** as a yellow solid (78.0 mg, 75%). HRMS (ESI-TOF) Calcd for C<sub>52</sub>H<sub>42</sub>F<sub>7</sub>N<sub>4</sub>O<sub>5</sub>Pd [M+H]<sup>+</sup>: 1041.2073; found: 1041.2070. **Intermediate B** was recrystallized in DCM/hexane, and the structure was determined by X-ray diffraction.

**Figure S3.** X-ray Crystallographic Data of **Intermediate B**

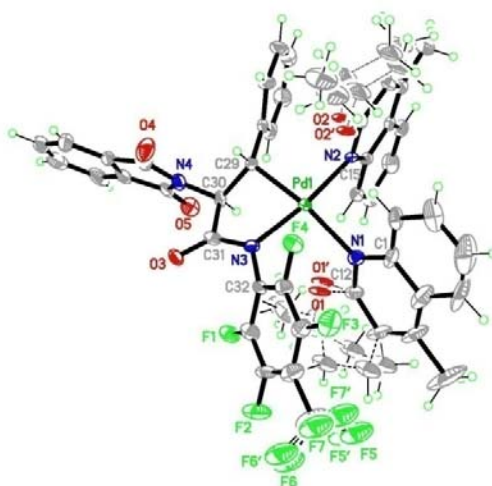

**Table S6: Crystal Data and Structure Refinement for Intermediate B**

CCDC-985677

|                                 |                                             |                              |
|---------------------------------|---------------------------------------------|------------------------------|
| Identification code             | <b>Intermediate B</b>                       |                              |
| Empirical formula               | $C_{52.50}H_{42}ClF_7N_4O_5Pd$              |                              |
| Molecular formula               | $C_{52}H_{41}F_7N_4O_5Pd, 0.5(CH_2Cl_2)$    |                              |
| Formula weight                  | 1083.75                                     |                              |
| Temperature                     | 150(2) K                                    |                              |
| Wavelength                      | 0.71073 Å                                   |                              |
| Crystal system                  | Monoclinic                                  |                              |
| Space group                     | C2                                          |                              |
| Unit cell dimensions            | $a = 34.9648(19) \text{ \AA}$               | $\alpha = 90^\circ$ .        |
|                                 | $b = 15.3694(7) \text{ \AA}$                | $\beta = 125.823(3)^\circ$ . |
|                                 | $c = 23.2457(13) \text{ \AA}$               | $\gamma = 90^\circ$ .        |
| Volume                          | 10128.8(9) Å <sup>3</sup>                   |                              |
| Z                               | 8                                           |                              |
| Density (calculated)            | 1.421 Mg/m <sup>3</sup>                     |                              |
| Absorption coefficient          | 0.495 mm <sup>-1</sup>                      |                              |
| F(000)                          | 4408                                        |                              |
| Crystal size                    | 0.20 × 0.16 × 0.12 mm <sup>3</sup>          |                              |
| Crystal color, habit            | orange / block                              |                              |
| Theta range for data collection | 1.76 to 26.45°.                             |                              |
| Index ranges                    | -43 ≤ h ≤ 35, -19 ≤ k ≤ 19, 0 ≤ l ≤ 28      |                              |
| Reflections collected           | 20613                                       |                              |
| Independent reflections         | 20613 [R(int) = 0.0000]                     |                              |
| Completeness to theta = 25.00°  | 99.9 %                                      |                              |
| Absorption correction           | multi-scan / sadabs                         |                              |
| Max. and min. transmission      | 0.9430 and 0.9075                           |                              |
| Refinement method               | Full-matrix least-squares on F <sup>2</sup> |                              |
| Data / restraints / parameters  | 20613 / 82 / 1227                           |                              |

|                                   |                                    |
|-----------------------------------|------------------------------------|
| Goodness-of-fit on F <sup>2</sup> | 1.049                              |
| Final R indices [I>2σ(I)]         | R1 = 0.0459, wR2 = 0.1080          |
| R indices (all data)              | R1 = 0.0652, wR2 = 0.1137          |
| Absolute structure parameter      | 0.043(18)                          |
| Largest diff. peak and hole       | 0.522 and -0.652 e.Å <sup>-3</sup> |

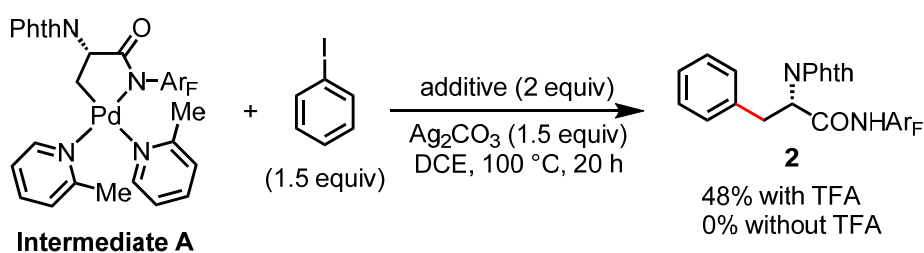

**Intermediate A** (0.1 mmol, 72.4 mg), and Ag<sub>2</sub>CO<sub>3</sub> (0.15 mmol, 41.4 mg) were weighed out open to air and placed in a sealable tube (50 mL) with a magnetic stir bar. Iodobenzene (30.6 mg, 0.15 mmol), TFA (0.2 mmol, 22.8 mg), and DCE (2 mL) were added. The reaction vessel was sealed and the mixture was first stirred at room temperature for 10 min and then heated to 100 °C for 20 hours with vigorous stirring. Upon completion, the reaction mixture was cooled to room temperature. The solvents were removed under reduced pressure and the resulting mixture was purified by a silica gel-packed flash chromatography column using hexane/EtOAc mixtures (3/1) as the eluent to afford **2** (24.6 mg, 48%).

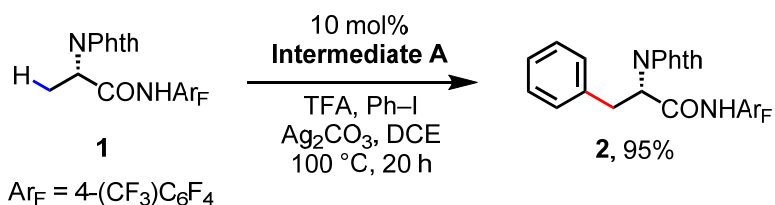

Substrate **1** (0.1 mmol, 43.4 mg), **Intermediate A** (0.01 mmol, 7.2 mg), and Ag<sub>2</sub>CO<sub>3</sub> (0.15 mmol, 41.4 mg) were weighed out open to air and placed in a microwave tube (5 mL) with

a magnetic stir bar. Iodobenzene (30.6 mg, 0.15 mmol), TFA (0.02 mmol, 2  $\mu$ L), and DCE (0.5 mL) were added. The reaction vessel was sealed and the mixture was first stirred at room temperature for 10 min and then heated to 100  $^{\circ}$ C for 20 hours with vigorous stirring. Upon completion, the reaction mixture was cooled to room temperature. The solvents were removed under reduced pressure and the resulting mixture was purified by a silica gel-packed flash chromatography column using toluene/EtOAc mixtures (30/1) as the eluent to afford **2** (53.1 mg, 95% based on **1** and **Intermediate A**).

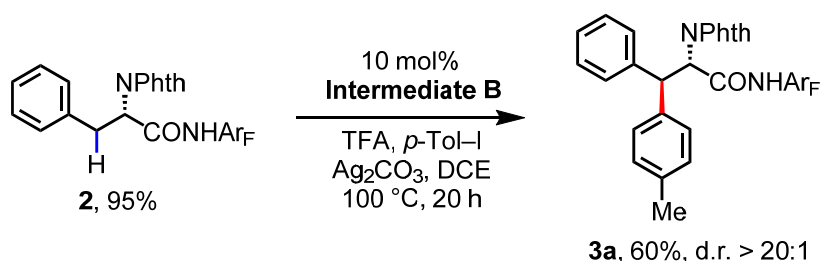

Substrate **2** (0.1 mmol, 51.0 mg), **Intermediate B** (0.01 mmol, 10.4 mg), 4-iodotoluene (0.3 mmol, 65.4 mg), and Ag<sub>2</sub>CO<sub>3</sub> (0.2 mmol, 55.0 mg) were weighed out open to air and placed in a microwave tube (5 mL) with a magnetic stir bar. TFA (0.02 mmol, 2  $\mu$ L) and DCE (0.5 mL) were added. The reaction vessel was sealed and the mixture was first stirred at room temperature for 10 min and then heated to 100  $^{\circ}$ C for 20 hours with vigorous stirring. Upon completion, the reaction mixture was cooled to room temperature. The solvents were removed under reduced pressure and the resulting mixture was purified by a silica gel-packed flash chromatography column using toluene/EtOAc mixtures (30/1) as the eluent to afford **3a** (39.8 mg, 60% based on **2** and **Intermediate B**). Analysis of crude reaction mixture by <sup>1</sup>H NMR showed a > 20:1 diastereomer ratio.

## I. Synthesis of *N*-Fmoc-Protected Unnatural Amino Acid

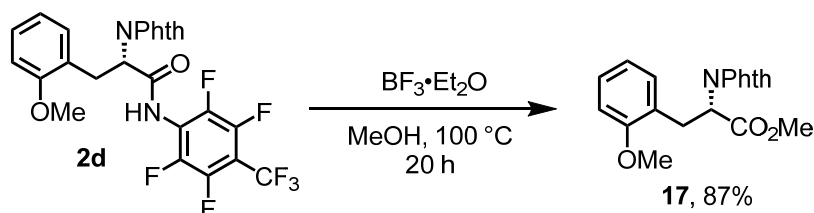

A sealable pressure flask was charged with MeOH (99 mL) and the amide **2d** (6.46 mmol, 3.49 g).  $\text{BF}_3 \cdot \text{Et}_2\text{O}$  (6 equiv) was added dropwise via syringe, and the reaction vessel sealed. The mixture was heated to  $100^\circ\text{C}$  for 20 h, and then cooled to room temperature. Triethylamine (6 equiv) was then carefully added via syringe, and stirred for 10 min. The solvent was removed *in vacuo*, and the residue purified by column chromatography using hexane/EtOAc (5/1) as the eluent to afford the desired product **17** (87%, 1.91 g).  $^1\text{H}$  NMR (400 MHz,  $\text{CDCl}_3$ )  $\delta$  7.76-7.74 (m, 2H), 7.67-7.66 (m, 2H), 7.12-7.09 (m, 1H), 6.99-6.98 (m, 1H), 6.76-6.75 (m, 1H), 6.70-6.67 (m, 1H), 5.39-5.36 (m, 1H), 3.78 (s, 3H), 3.76 (s, 3H), 3.66-3.63 (m, 1H), 3.44-3.40 (m, 1H).

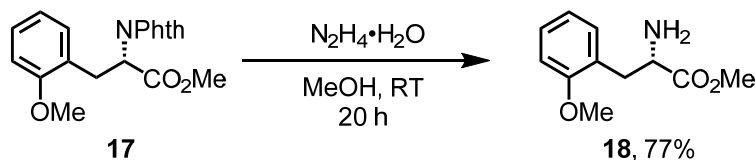

*N*-Phthalimido-protected amino ester **17** (4.60 mmol, 1.56 g) was dissolved in MeOH (88 mL), and  $\text{N}_2\text{H}_4 \cdot \text{H}_2\text{O}$  (4 equiv) was added. The reaction was stirred at room temperature for 20 h, after which, the solvent was removed *in vacuo*. Saturated aqueous  $\text{NaHCO}_3$  was added, and the solution extracted with EtOAc ( $3 \times 50$  mL). The organic layer was washed with brine, dried over anhydrous  $\text{Na}_2\text{SO}_4$ , filtered, and concentrated. The residue was purified by column chromatography using hexane/EtOAc (1/1) as the eluent to afford the desired product **18** (77%, 0.74 g) (**30**).  $^1\text{H}$  NMR (500 MHz,  $\text{CDCl}_3$ )  $\delta$  7.24-7.21 (m, 1H), 7.13-7.11 (m, 1H), 6.91-6.85 (m, 2H), 3.83-3.79 (m, 4H), 3.70 (s, 3H), 3.12 (dd,  $J_1 = 5.6$  Hz,  $J_2 = 13.3$  Hz, 1H), 2.85 (dd,  $J_1 = 8.2$  Hz,  $J_2 = 13.3$  Hz, 1H), 1.64 (br s, 2H).

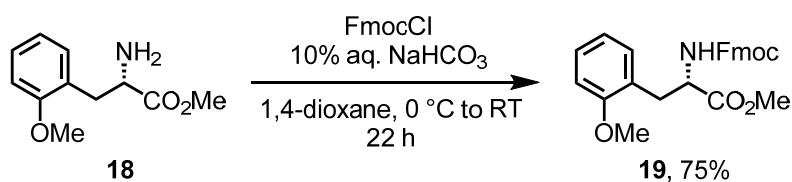

Amino ester **18** (3.54 mmol, 0.74 g) was taken up in 1,4-dioxane (18 mL), and 10% aqueous NaHCO<sub>3</sub> (11 mL) was added. The mixture was cooled to 0 °C and FmocCl (3.54 mmol, 1 equiv) was added. The ice bath was allowed to warm to room temperature overnight, after which H<sub>2</sub>O and EtOAc were added to the reaction mixture. The aqueous layer was then extracted with EtOAc (3 × 50 mL) and the combined organic layer was washed with brine, dried over anhydrous Na<sub>2</sub>SO<sub>4</sub>, filtered and concentrated. The residue was purified by column chromatography using hexane/EtOAc (5/1) as the eluent to afford the desired product **19** (75%, 1.15 g). <sup>1</sup>H NMR (400 MHz, CDCl<sub>3</sub>) δ 7.75 (d, *J* = 7.6 Hz, 2H), 7.56-7.51 (m, 2H), 7.41-7.37 (m, 2H), 7.31-7.22 (m, 3H), 7.10-7.08 (m, 1H), 6.92-6.86 (m, 2H), 5.61 (d, *J* = 7.8 Hz, 1H), 4.61-4.56 (m, 1H), 4.32 (d, *J* = 6.7 Hz, 2H), 4.18 (t, *J* = 7.1 Hz, 1H), 3.82 (s, 3H), 3.73 (s, 3H), 3.17-3.08 (m, 2H).

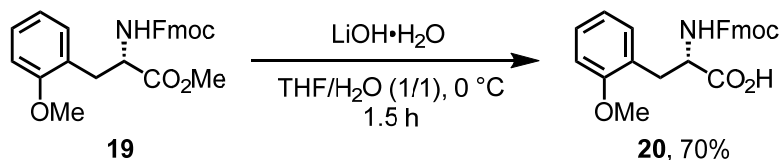

Methyl ester **19** (2.55 mmol, 1.10 g) was dissolved in THF (18 mL). The solution was cooled to 0 °C, and a cold solution of LiOH·H<sub>2</sub>O (5.10 mmol, 2 equiv) in H<sub>2</sub>O (18 mL) were added. The reaction was maintained at 0 °C and monitored by TLC. After consumption of starting material, the reaction was acidified with HCl (2 N) and extracted with EtOAc (4 × 50 mL). The combined organic layers were dried over anhydrous Na<sub>2</sub>SO<sub>4</sub> and concentrated. The residue was purified by column chromatography using hexane/EtOAc/MeOH (3/2/0.1) as the eluent to afford the desired product **20** (70%, 0.74 g). Spectral data agree with literature (31). <sup>1</sup>H NMR (400 MHz, CDCl<sub>3</sub>) δ 7.75 (d, *J* = 7.6 Hz, 2H), 7.54-7.49 (m, 2H), 7.41-7.37 (m, 2H), 7.31-7.24 (m, 3H), 7.14 (d, *J* = 7.2 Hz, 1H),

6.93-6.87 (m, 2H), 5.68 (d,  $J = 7.3$  Hz, 1H), 4.60-4.54 (m, 1H), 4.34 (d,  $J = 7.0$  Hz, 2H),  
4.18 (t,  $J = 7.1$  Hz, 1H), 3.80 (s, 3H), 3.23-3.13 (m, 2H).

## J. Intramolecular Isotope Effect and Ligand Acceleration

**General Procedure:** Substrate **21** (0.1 mmol, 30.6 mg), Pd(TFA)<sub>2</sub> (0.01 mmol, 3.3 mg), and Ag<sub>2</sub>CO<sub>3</sub> (0.15 mmol, 41.4 mg) were weighed out open to air and placed in a microwave tube (5 mL) with a magnetic stir bar. 4-Iodotoluene (0.15 mmol, 32.7 mg), ligand (0.02 mmol), TFA (0.02 mmol, 2 μL), and DCE (0.5 mL) were added. The reaction vessel was sealed. The reaction mixture was first stirred at room temperature for 10 min and then heated to 100 °C under vigorous stirring. After a certain amount of time, the reaction mixture was cooled to room temperature. The solvents were removed under reduced pressure. All conversions were determined by analysis of the crude <sup>1</sup>H NMR (CDCl<sub>3</sub>) spectrum using CH<sub>2</sub>Br<sub>2</sub> as the internal standard. The ratio of the arylated products was determined by <sup>1</sup>H NMR (CDCl<sub>3</sub>) spectrum after the reaction mixture was purified by a silica gel-packed flash chromatography column using hexane/EtOAc (5/1) as the eluent.

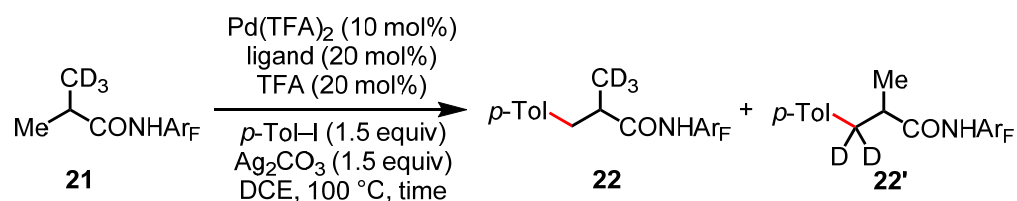

| Entry | Ligand     | Time (h) | Conversion (%) <sup>*</sup> | Ratio ( <b>22/22'</b> ) <sup>*</sup> |
|-------|------------|----------|-----------------------------|--------------------------------------|
| 1     | —          | 10       | 13                          | 6.0                                  |
| 2     | <b>L7</b>  | 10       | 45                          | 8.1                                  |
| 3     | <b>L7</b>  | 24       | 80                          | 8.1                                  |
| 4     | <b>L10</b> | 5        | 100                         | 10.7                                 |

<sup>\*</sup>Conversions and ratios are the averaged results of three reproducible experiments.



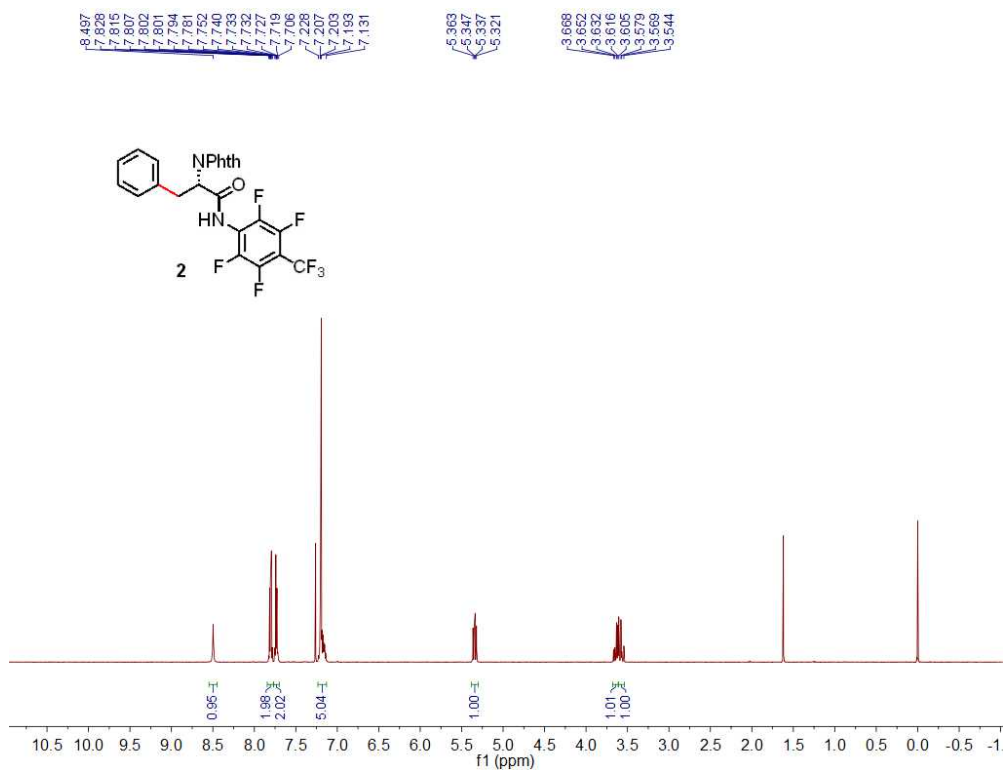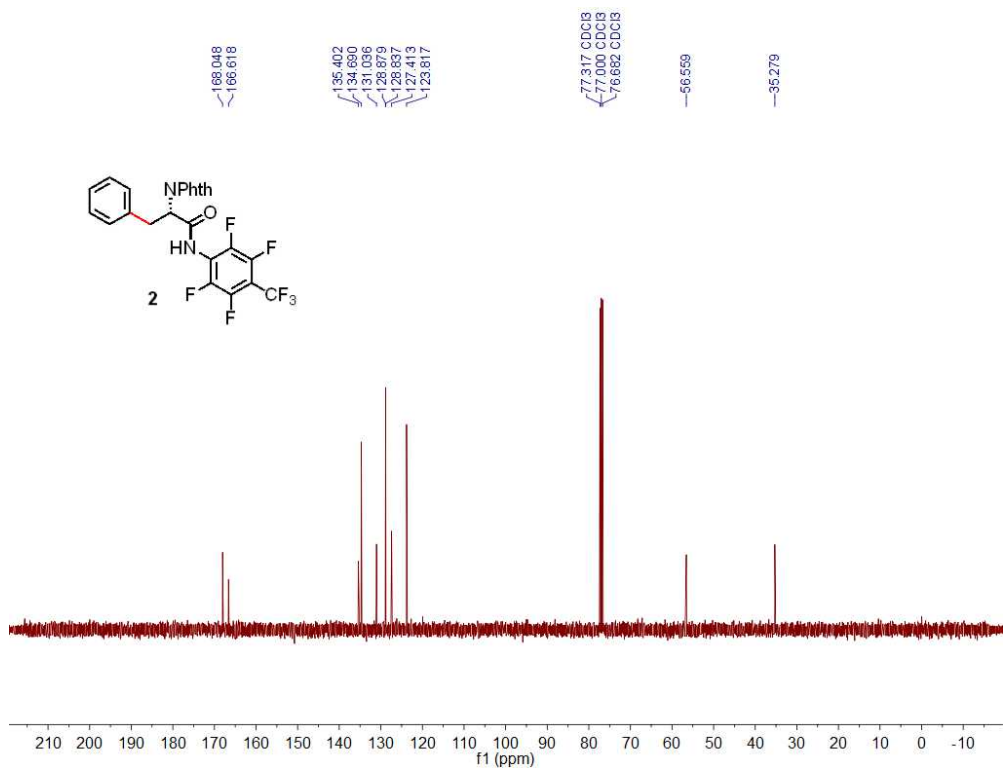

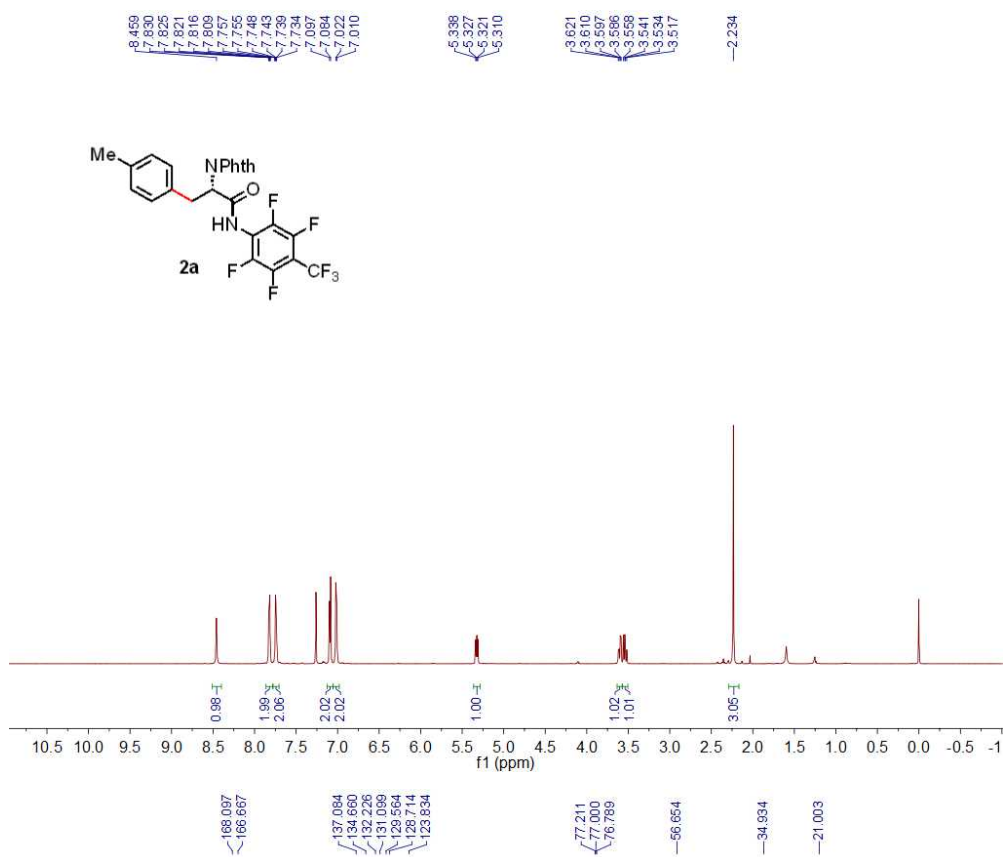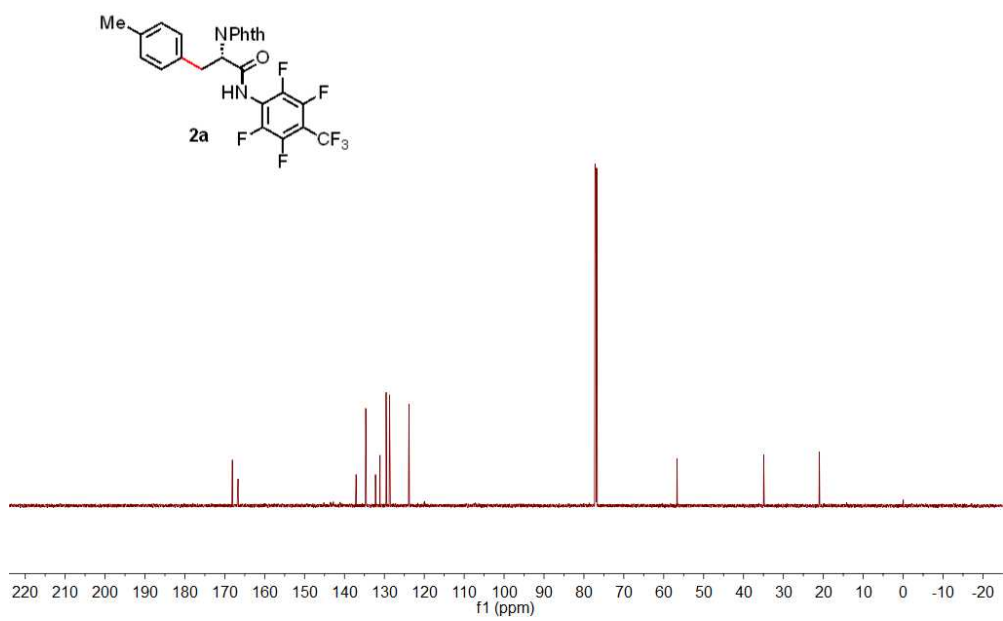

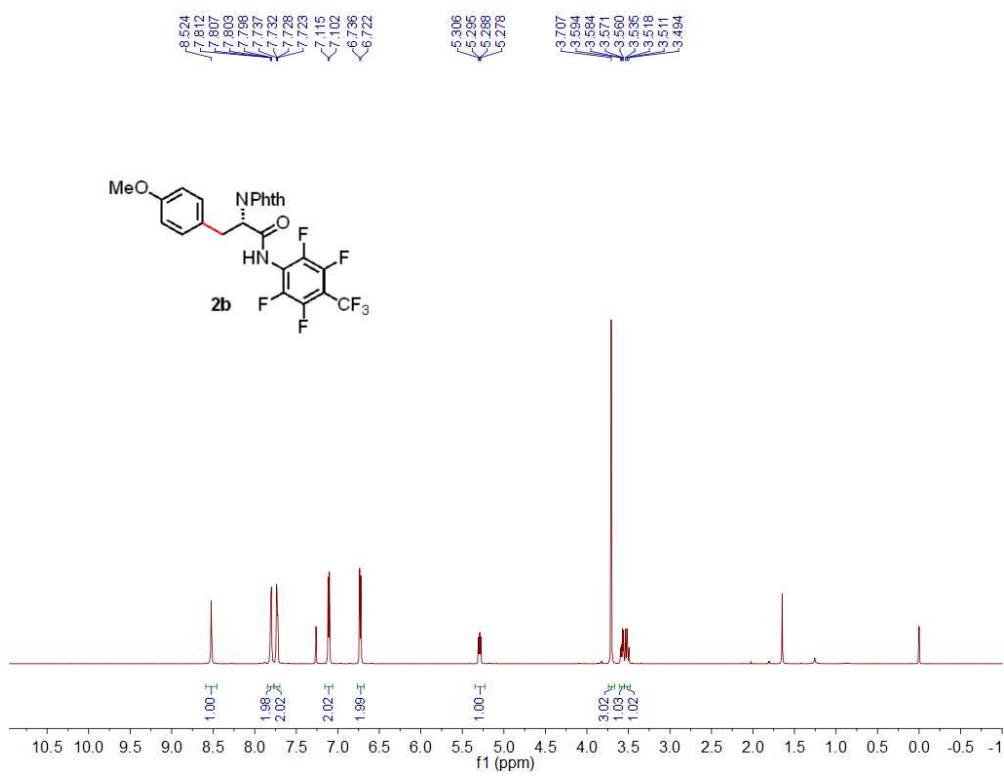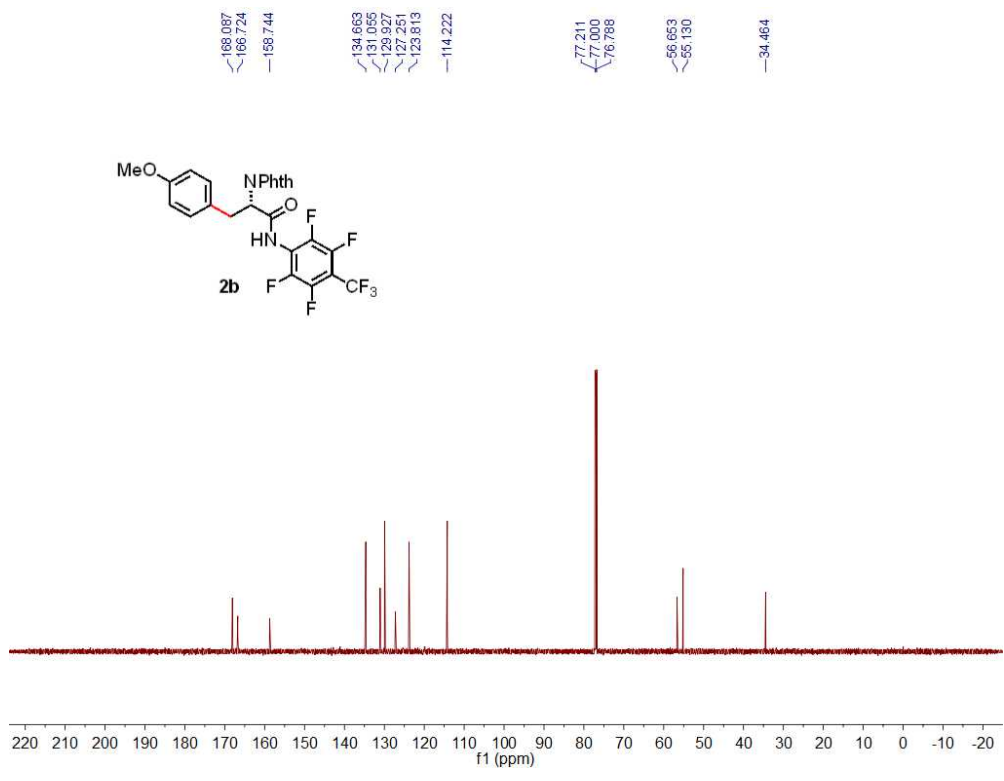

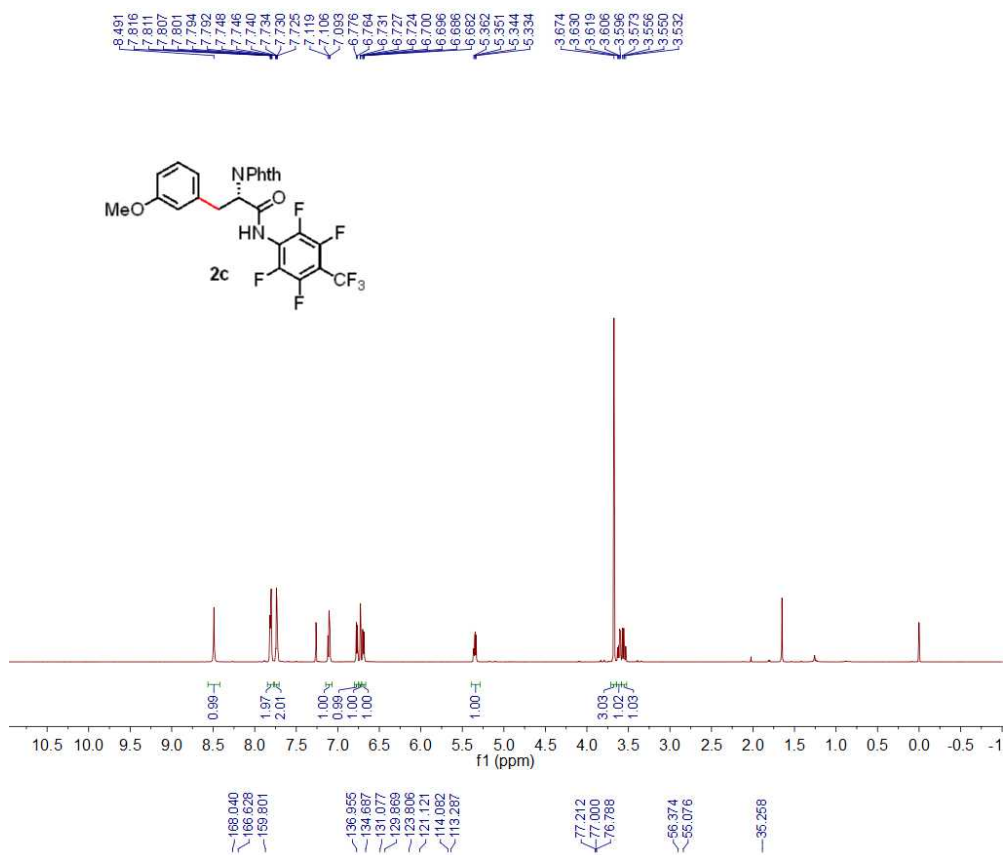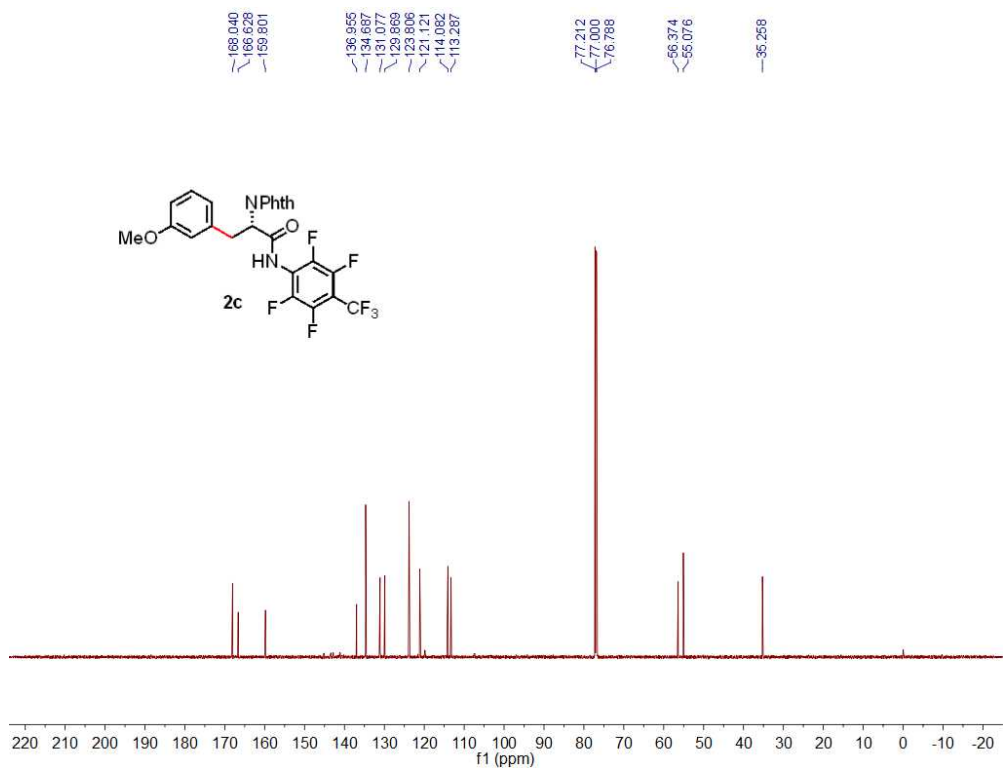

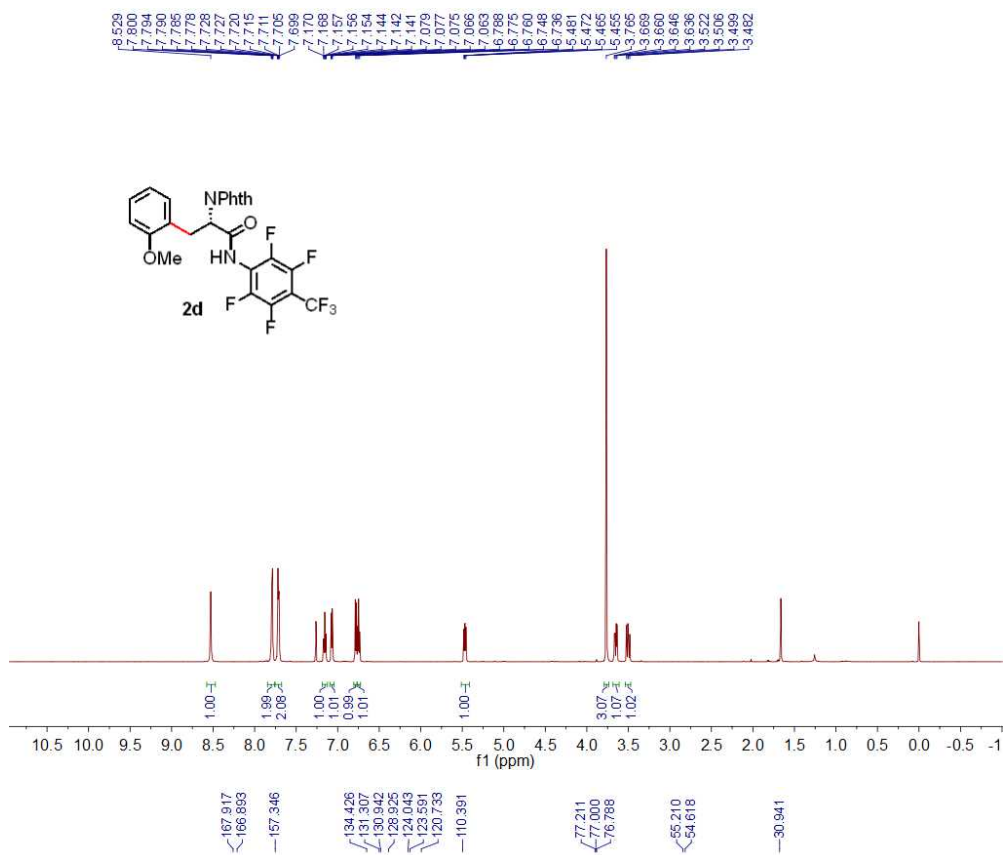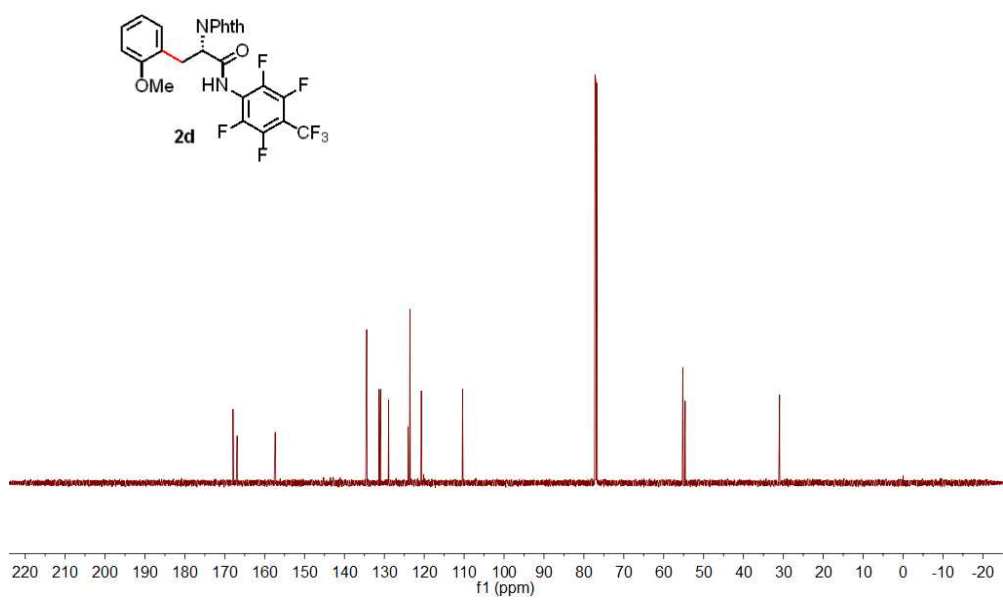

8.543  
7.817  
7.810  
7.805  
7.801  
7.796  
7.788  
7.786  
7.782  
7.743  
7.739  
7.734  
7.727  
7.159  
7.150  
7.145  
7.137  
7.131  
6.888  
6.859  
6.845  
6.829  
6.827  
6.867  
6.864  
5.304  
5.294  
5.287  
5.276  
3.616  
3.605  
3.594  
3.584  
3.574  
3.557  
3.533

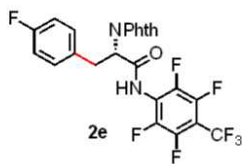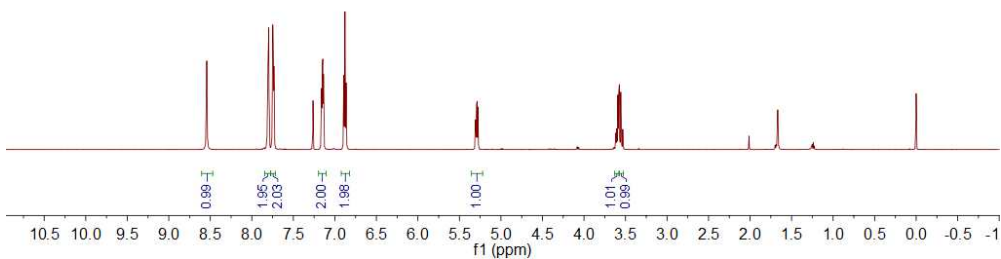

167.892  
166.525  
162.768  
161.136  
134.898  
131.938  
131.116  
130.908  
130.490  
130.437  
123.869  
115.785  
115.644  
77.212  
77.000  
76.788  
56.403  
34.379

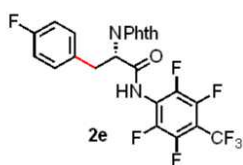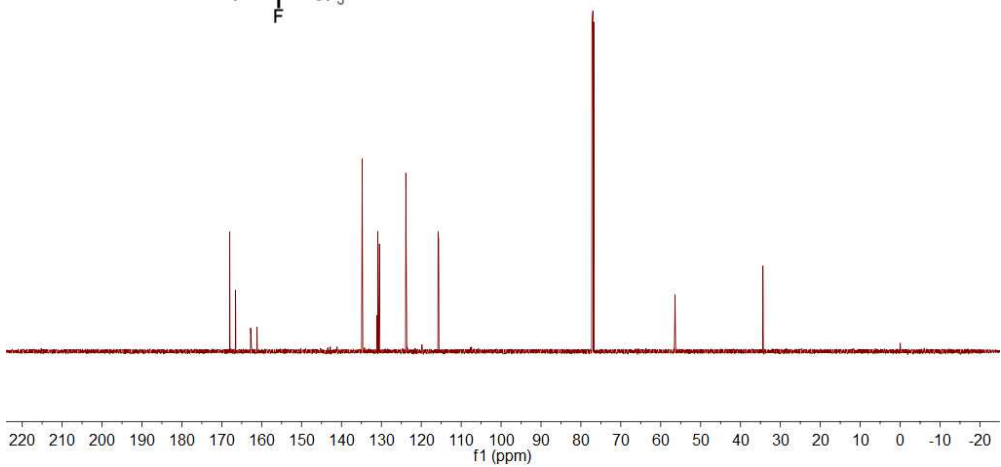

8.507  
7.823  
7.815  
7.810  
7.806  
7.801  
7.794  
7.762  
7.758  
7.748  
7.739  
7.733  
7.727  
7.725  
7.195  
7.175  
7.172  
7.172  
7.161  
7.188  
7.188  
6.963  
6.963  
6.912  
6.908  
6.905  
6.896  
6.892  
6.889  
6.866  
6.862  
6.852  
6.848  
6.838  
6.834  
6.834  
5.323  
5.315  
5.305  
3.648  
3.638  
3.624  
3.614  
3.599  
3.581  
3.575  
3.557

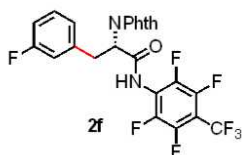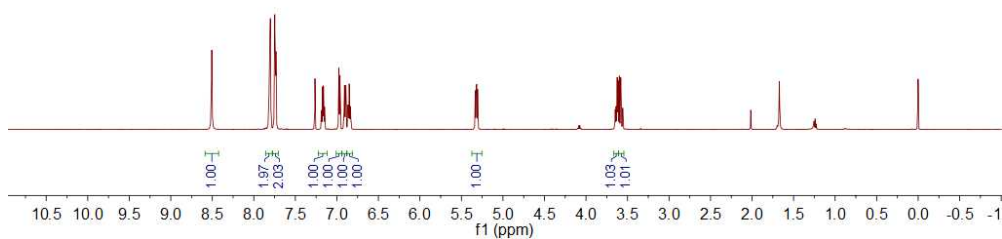

167.939  
166.387  
163.959  
161.953  
137.699  
137.640  
134.814  
130.924  
130.370  
130.315  
124.562  
124.543  
123.886  
115.887  
115.845  
114.456  
114.316  
77.211  
77.000  
76.788  
-56.071  
-34.816

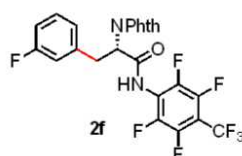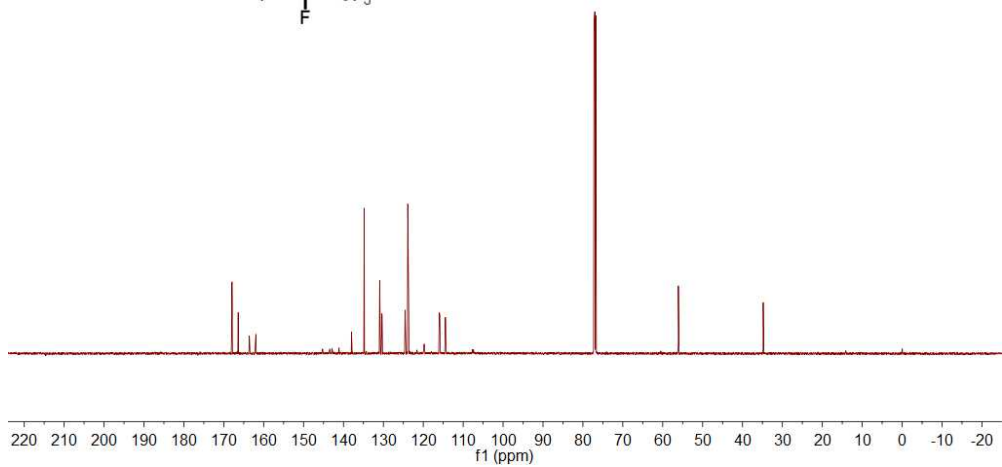

8.461  
7.812  
7.810  
7.803  
7.797  
7.794  
7.788  
7.781  
7.742  
7.730  
7.728  
7.721  
7.714  
7.712  
7.712  
7.186  
7.183  
7.189  
7.151  
7.146  
7.137  
7.131  
7.131  
6.957  
6.954  
6.946  
6.939  
6.933  
6.925  
6.925  
6.372  
6.363  
6.355  
3.849  
3.845  
3.661  
3.652  
3.616  
3.598  
3.592  
3.575

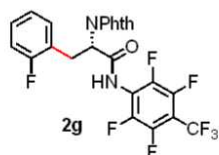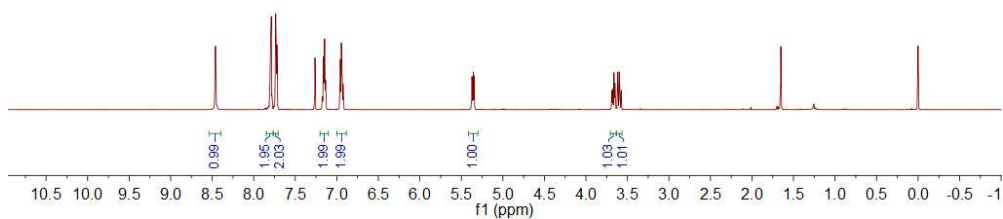

167.785  
166.278  
162.082  
160.451  
134.691  
131.930  
131.049  
129.425  
129.371  
124.383  
124.360  
123.800  
122.745  
115.567  
115.423  
77.211  
77.000  
76.788  
54.802  
28.158  
28.144

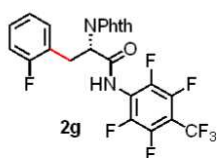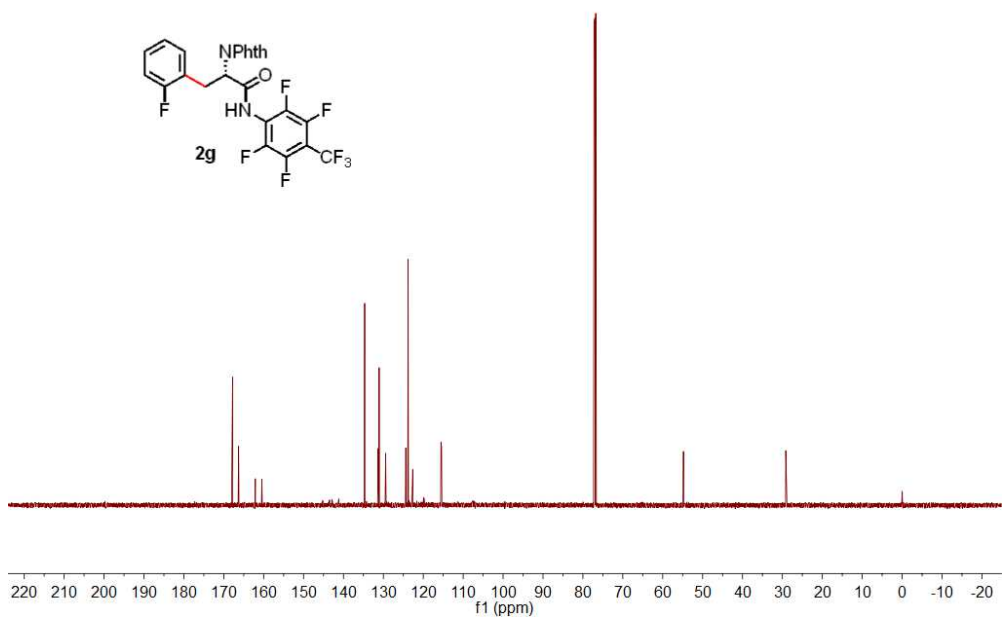



8.511  
7.823  
7.815  
7.810  
7.806  
7.801  
7.793  
7.783  
7.748  
7.744  
7.738  
7.733  
7.717  
7.127  
7.114

5.313  
5.302  
5.296  
5.286

3.614  
3.603  
3.590  
3.584  
3.579  
3.567  
3.543

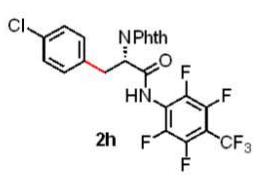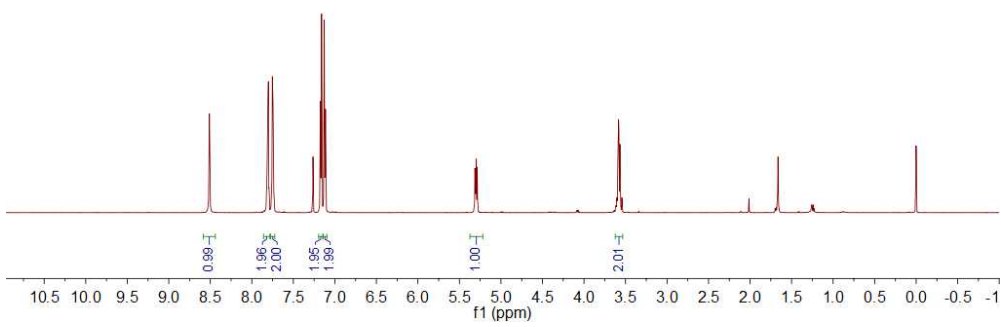

167.955  
166.435

134.844  
133.924  
133.263  
130.885  
130.222  
128.865  
123.919

77.212  
77.000  
76.789

56.148

34.496

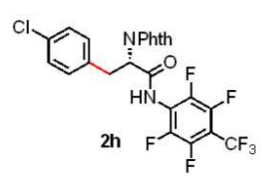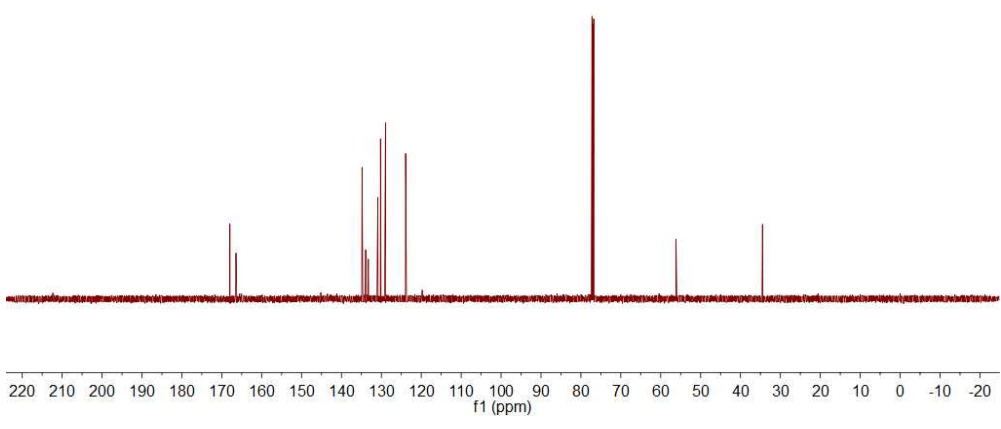

8.499  
 7.823  
 7.817  
 7.810  
 7.808  
 7.802  
 7.795  
 7.764  
 7.762  
 7.756  
 7.751  
 7.746  
 7.741  
 7.735  
 7.328  
 7.314  
 7.314  
 7.056  
  
 5.314  
 5.302  
 5.297  
 5.286  
  
 3.589  
 3.567  
 3.562  
 3.572  
 3.563  
 3.555  
 3.548  
 3.532

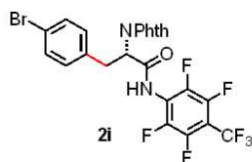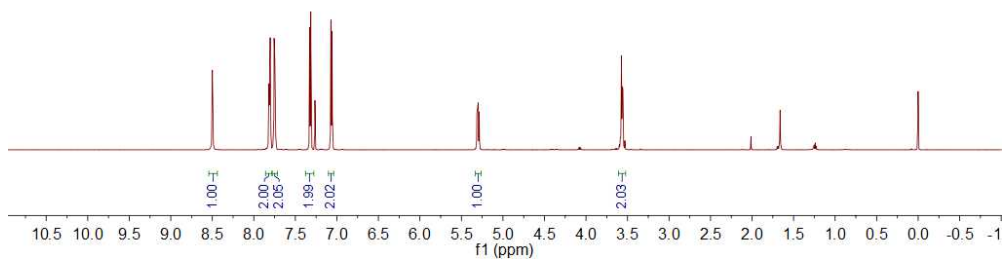

167.949  
 166.415  
  
 134.852  
 131.446  
 130.878  
 130.569  
 123.931  
 121.377  
  
 77.211  
 77.000  
 76.788  
  
 56.051  
  
 34.555

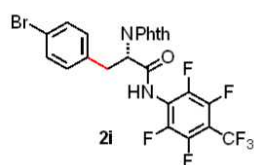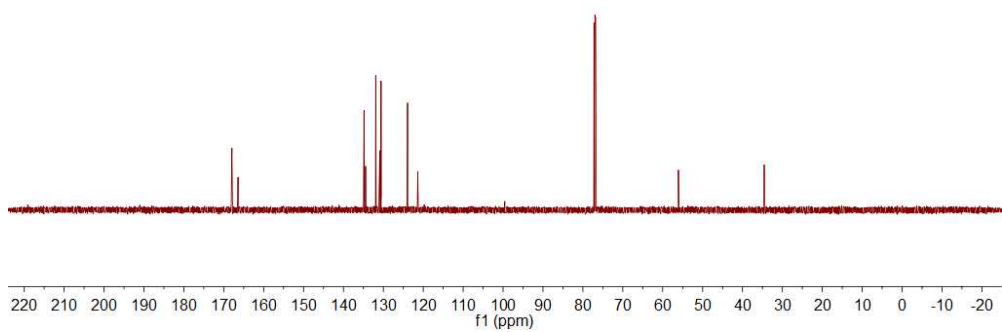

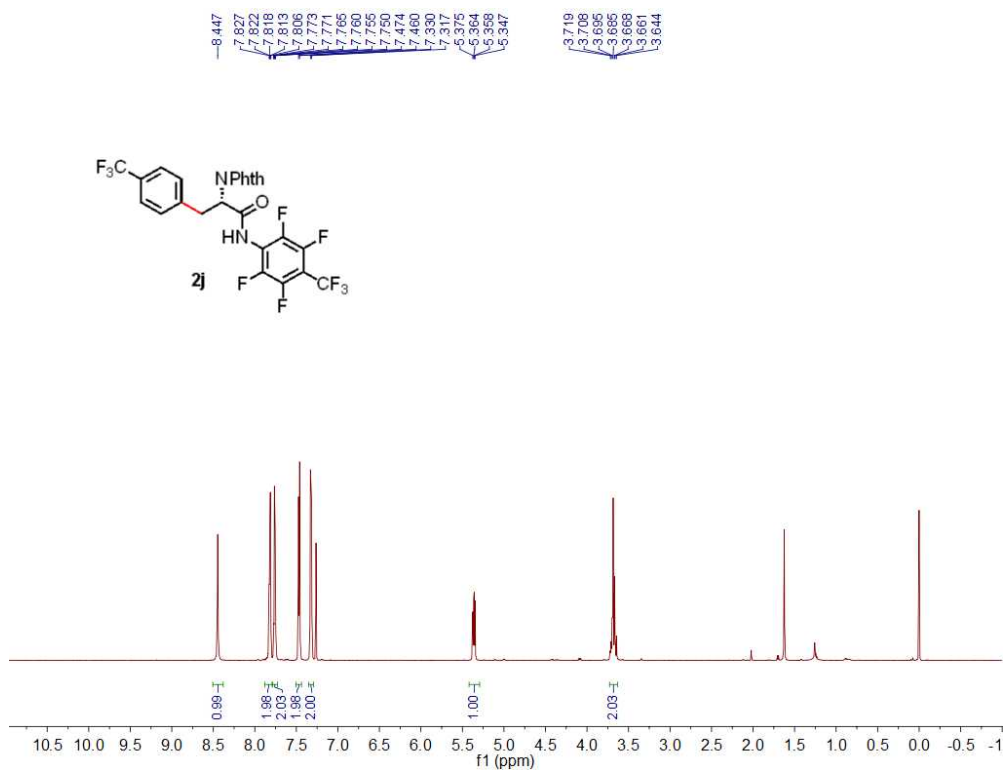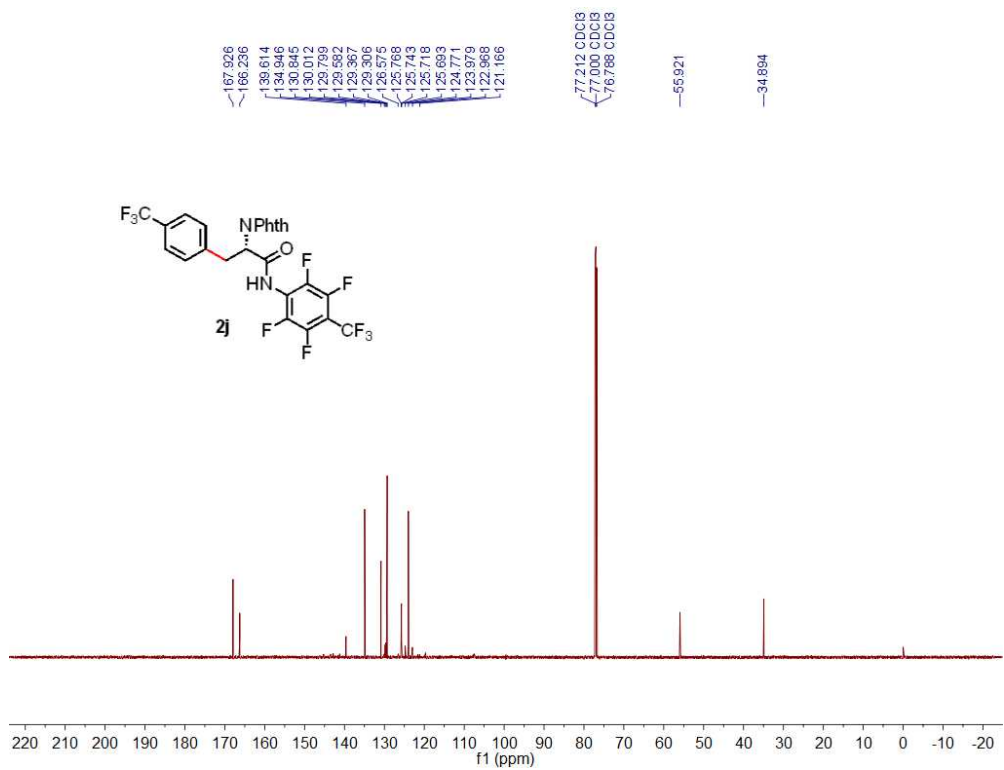

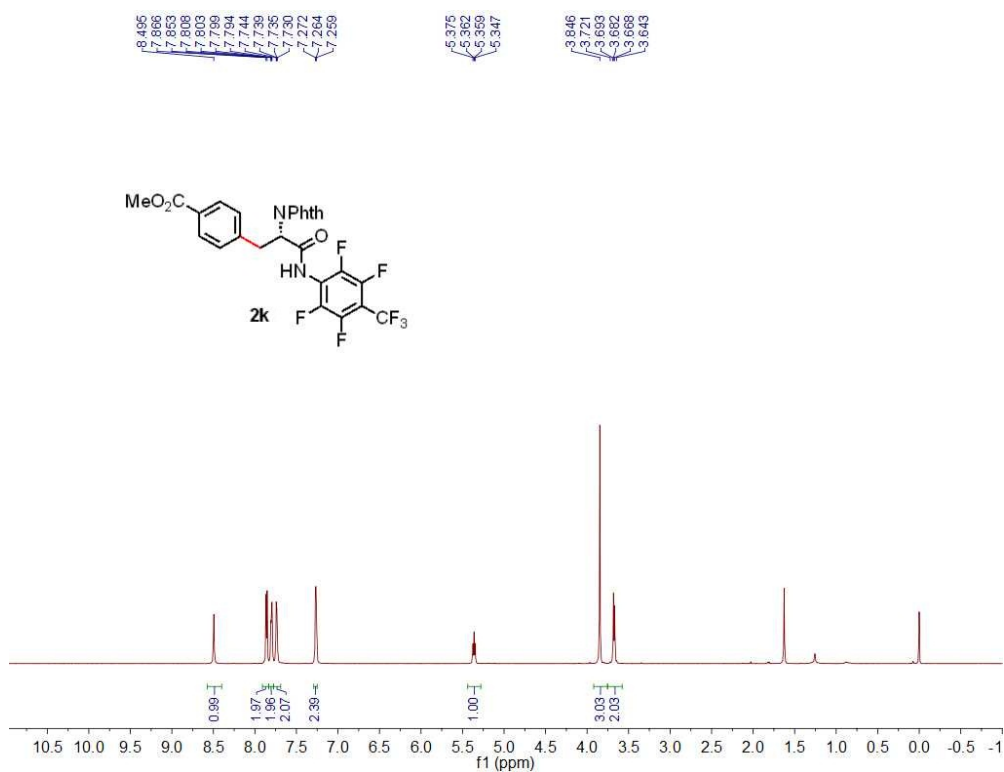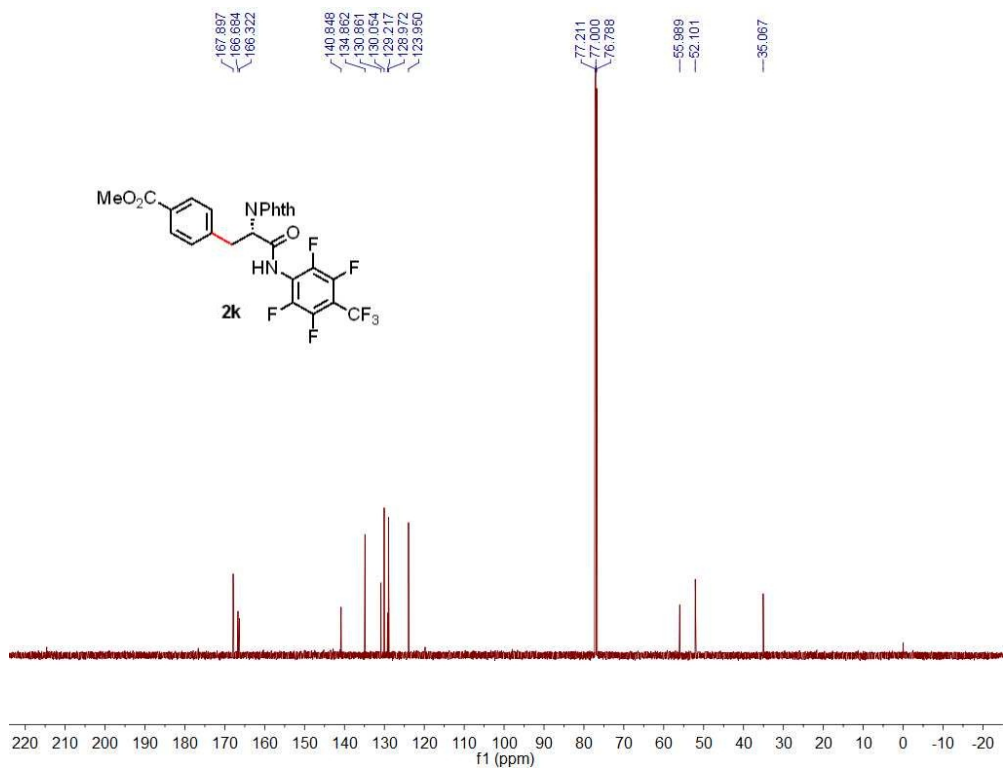

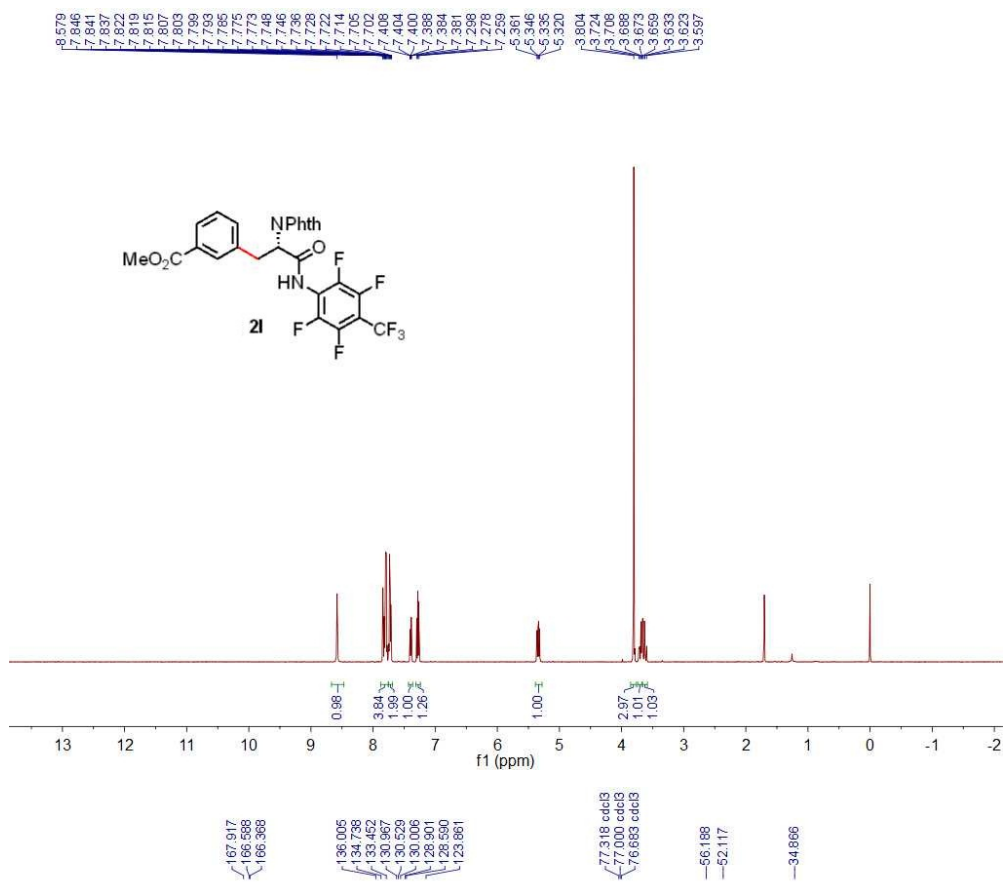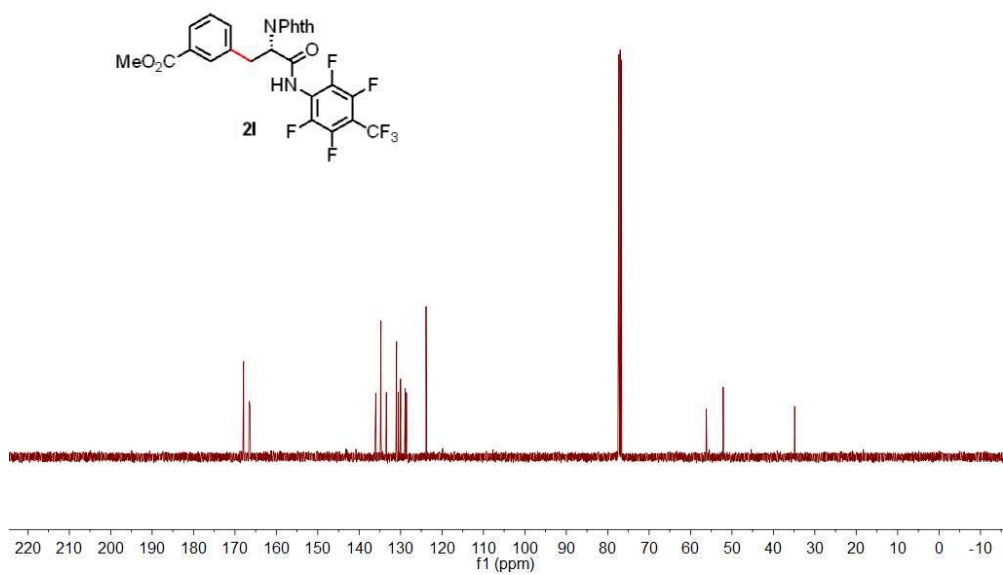

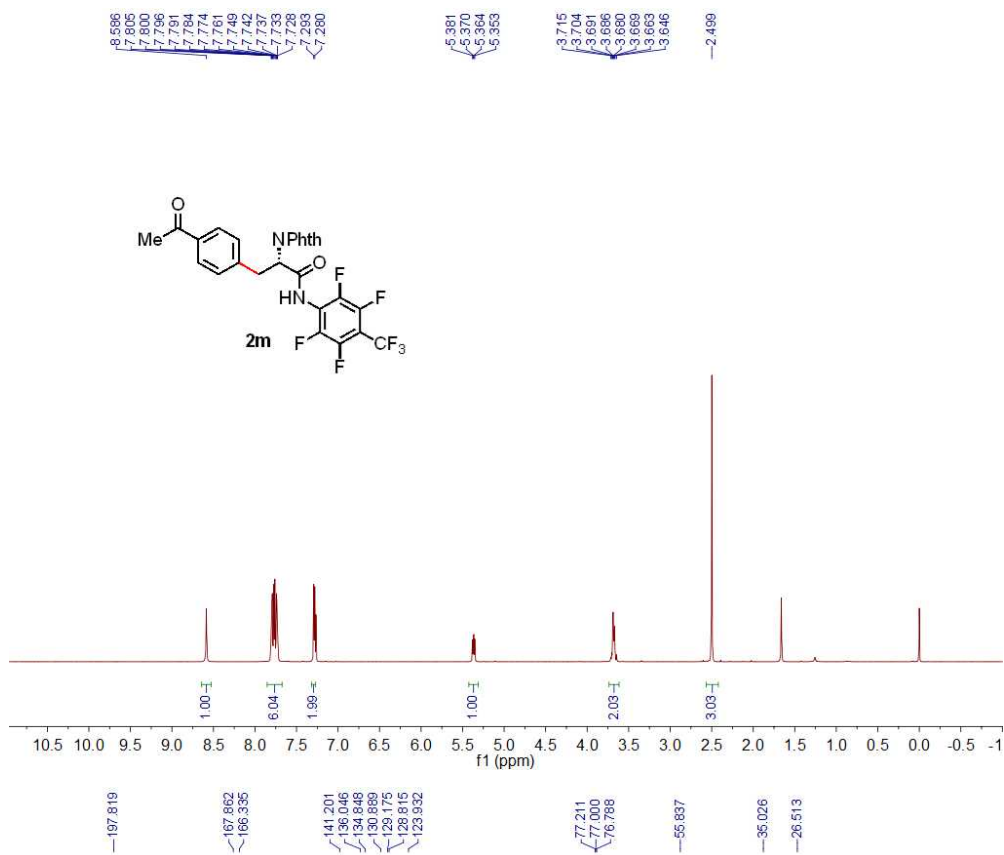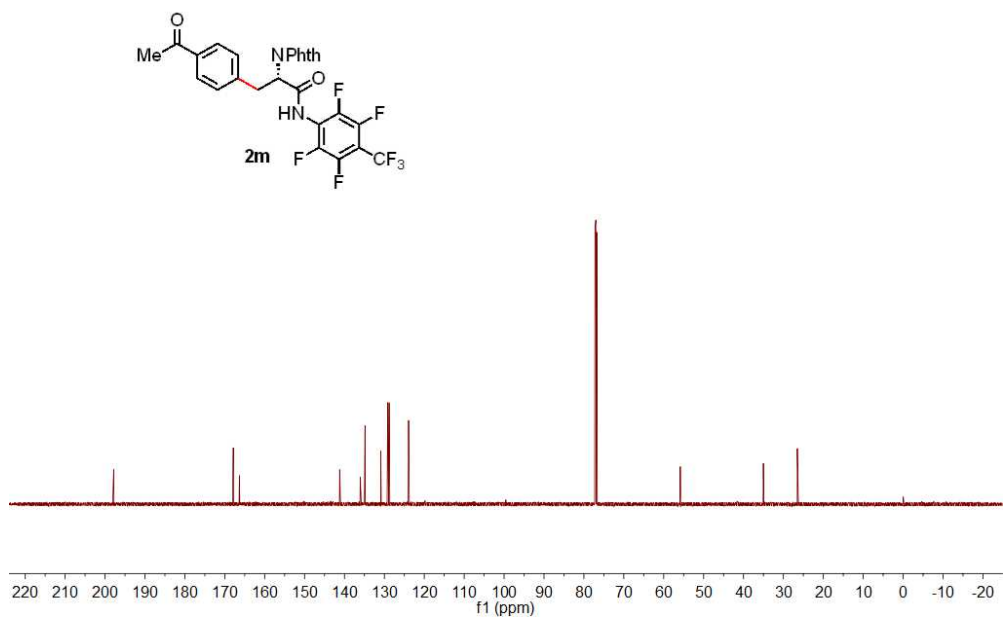

8.413  
8.063  
8.060  
7.828  
7.822  
7.819  
7.814  
7.806  
7.781  
7.773  
7.769  
7.765  
7.399  
7.374

5.363  
5.372  
5.366  
5.355

3.754  
3.753  
3.740  
3.731  
3.715  
3.691

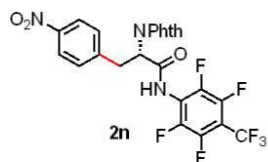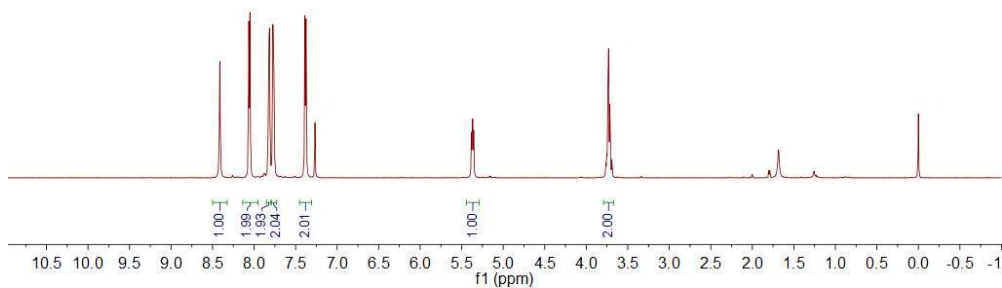

167.740  
166.001  
147.168  
143.314  
135.054  
130.740  
129.910  
124.055  
123.954

77.211  
77.000  
76.788  
55.391  
34.819

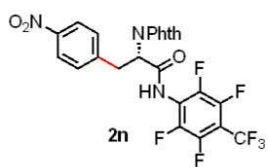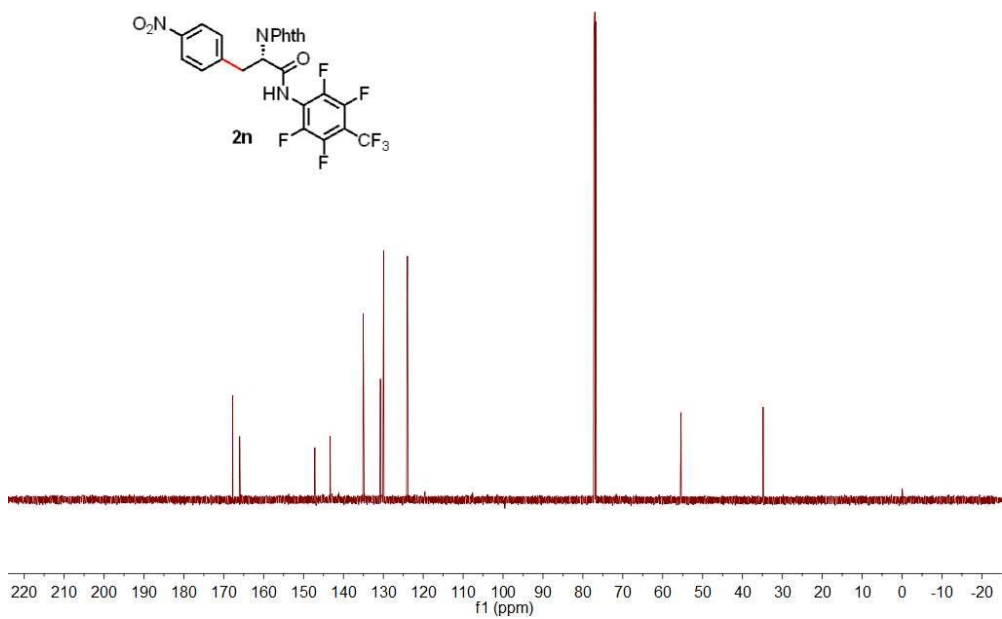

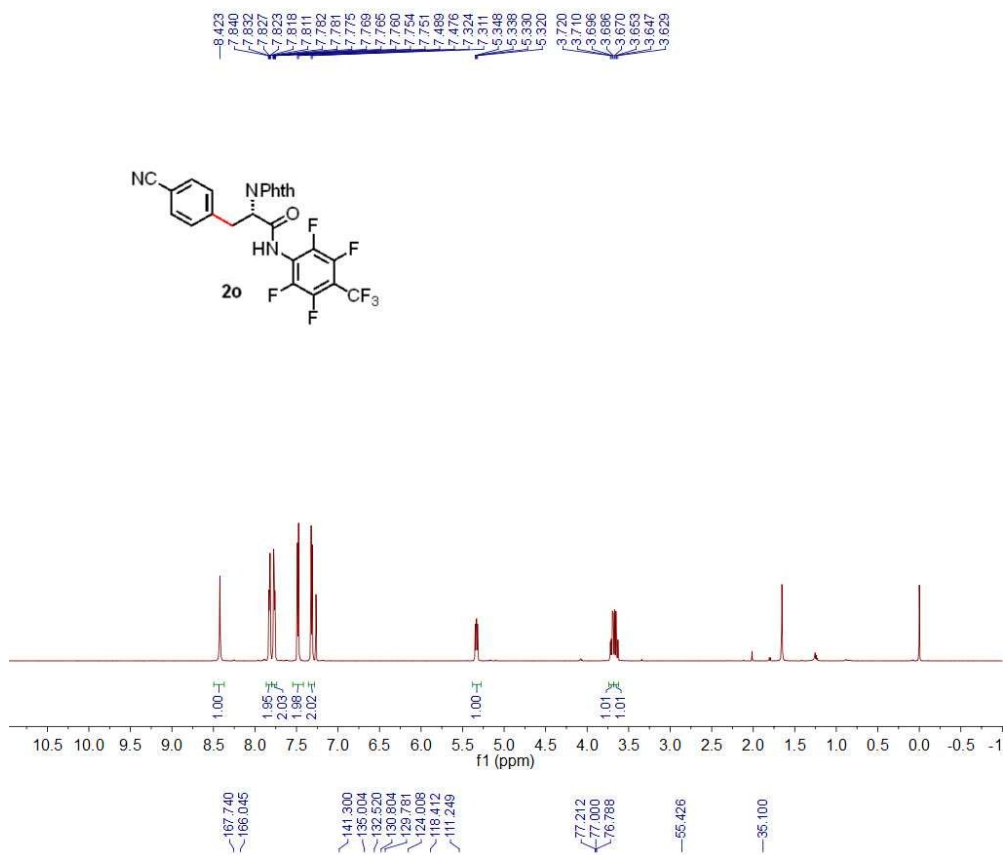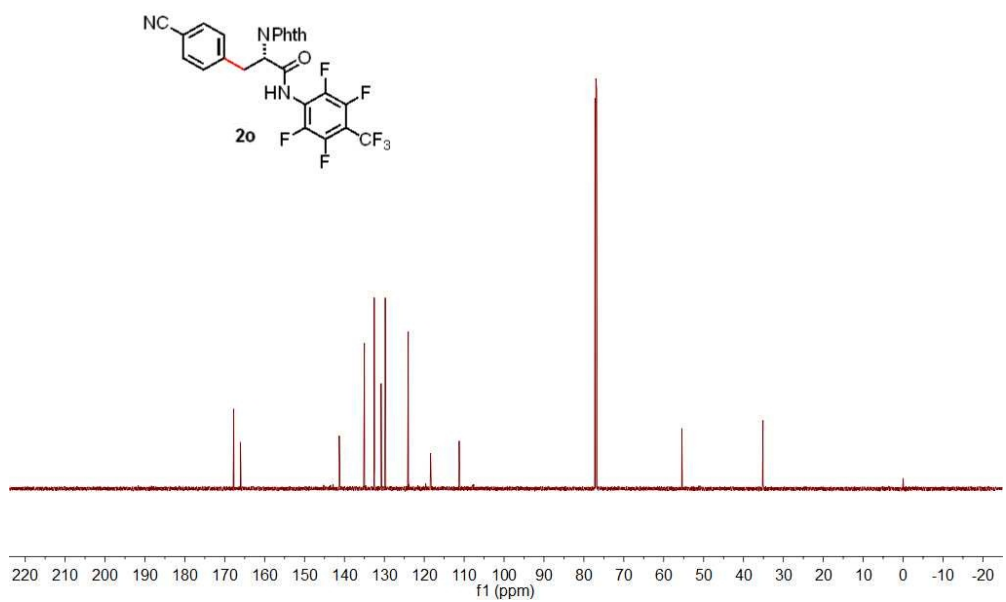



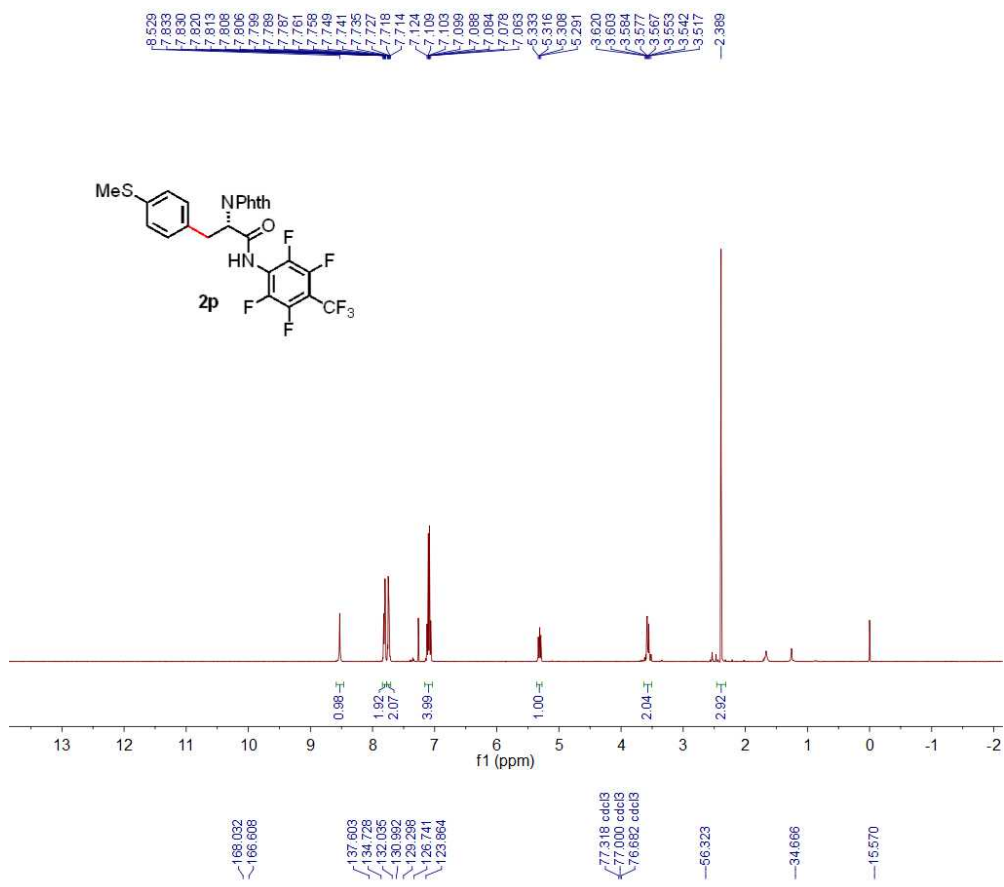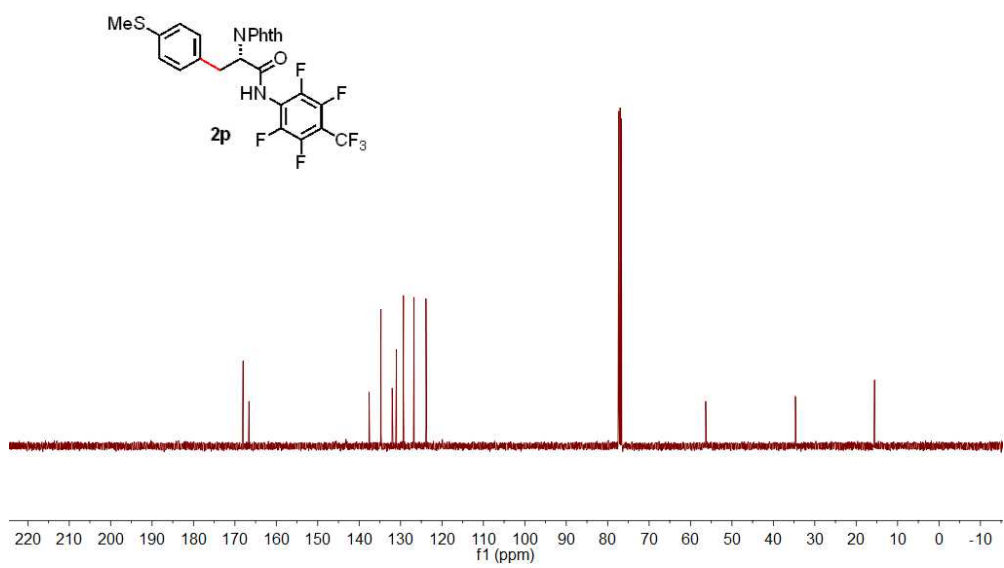

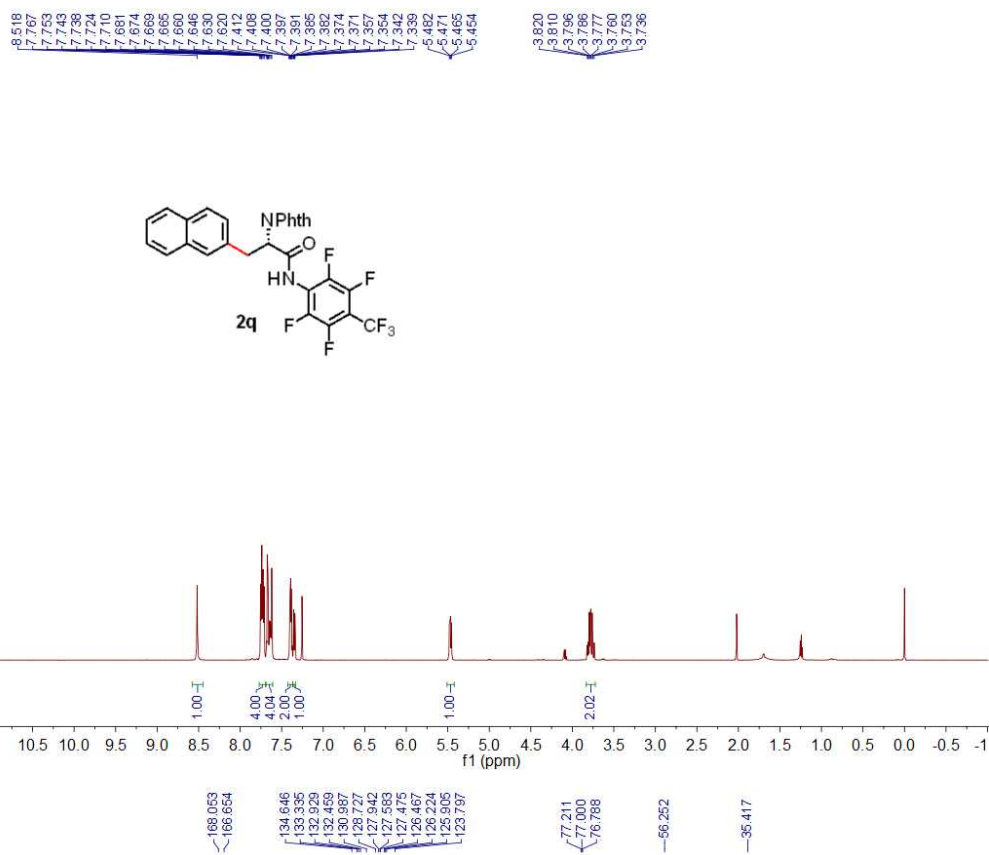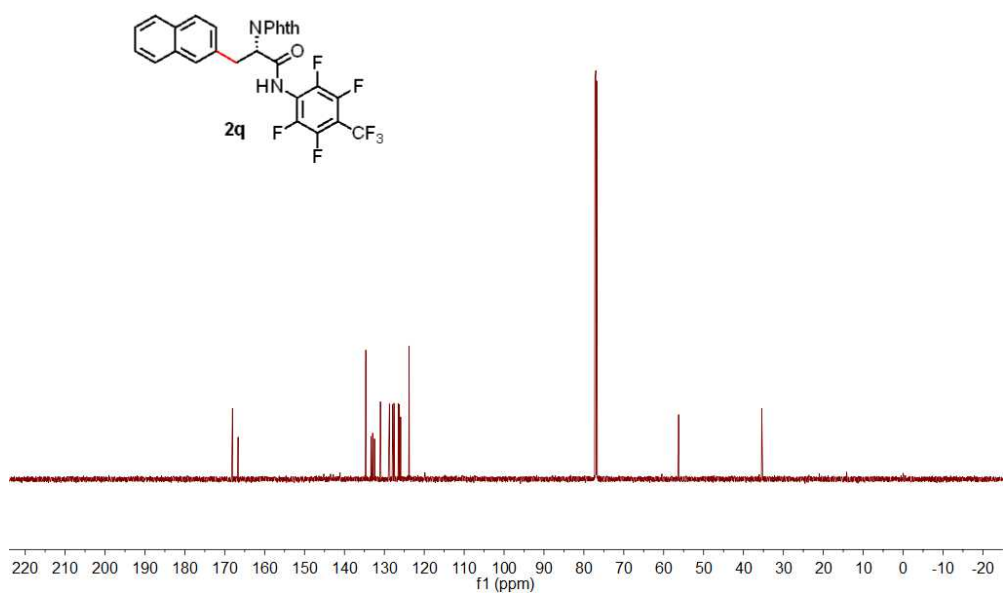

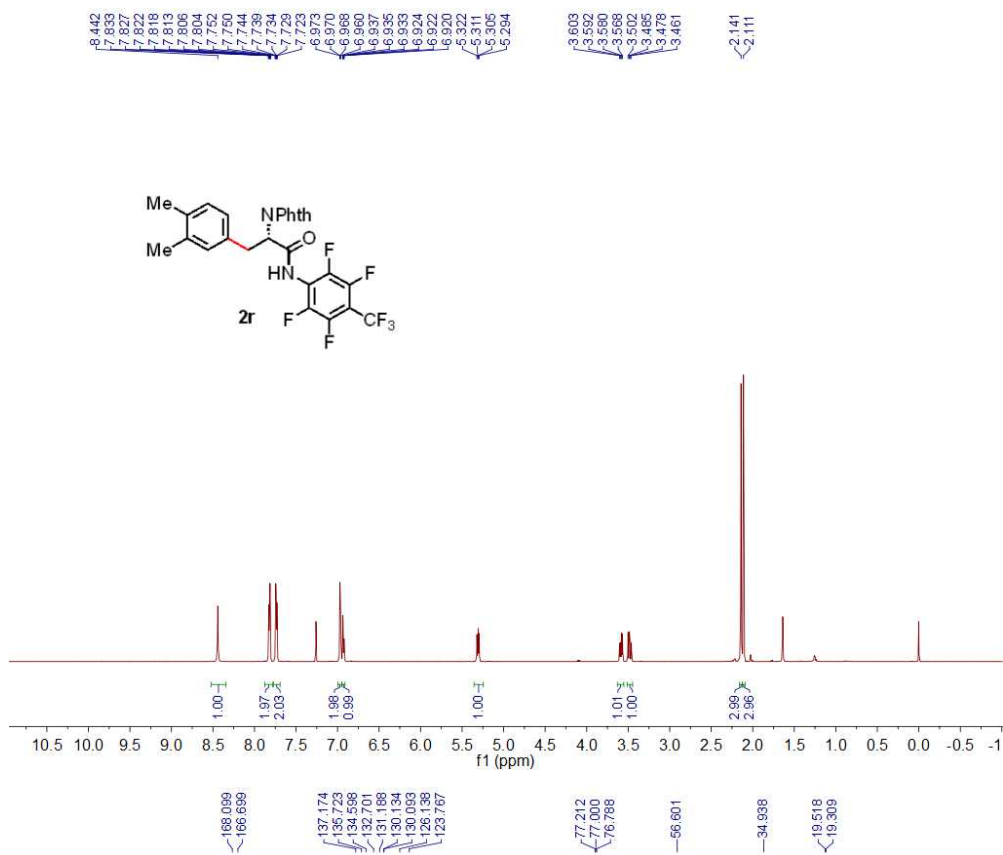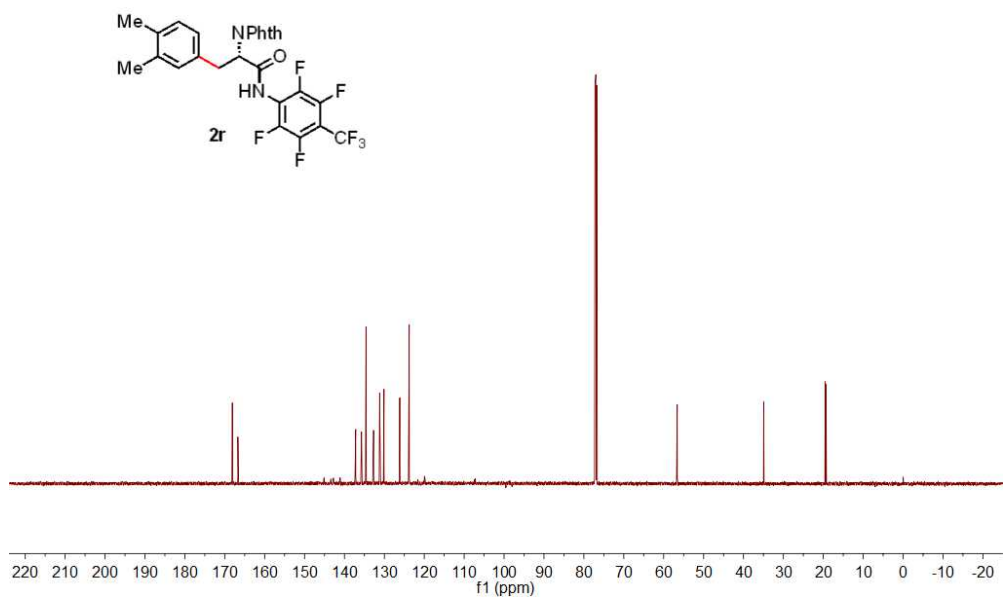

8.504  
7.846  
7.843  
7.836  
7.831  
7.827  
7.820  
7.815  
7.813  
7.765  
7.763  
7.756  
7.751  
7.747  
7.742  
7.733  
7.704  
6.828  
6.825  
6.614  
6.612  
6.598  
5.882  
5.880  
5.863  
5.287  
5.277  
5.270  
5.260

3.565  
3.555  
3.542  
3.531  
3.510  
3.493  
3.483  
3.469

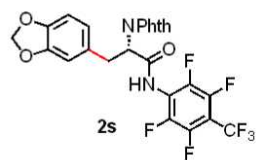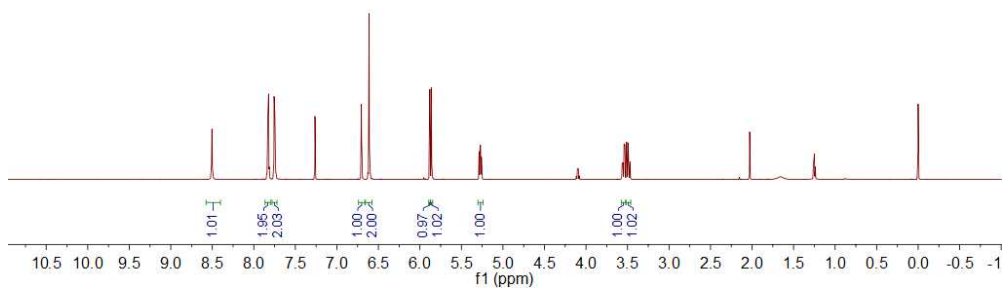

168.071  
 166.579  
 147.975  
 146.835  
 134.726  
 131.061  
 129.000  
 123.880  
 122.104  
 109.052  
 108.451  
 101.039  
 77.211  
 77.000  
 76.788  
 56.633  
 35.001

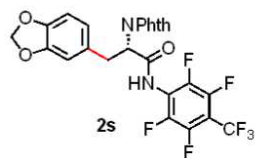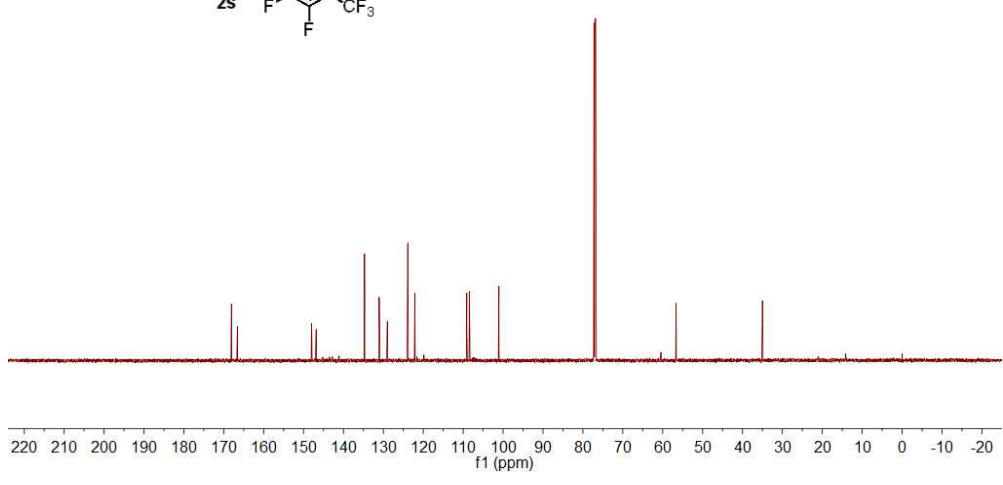

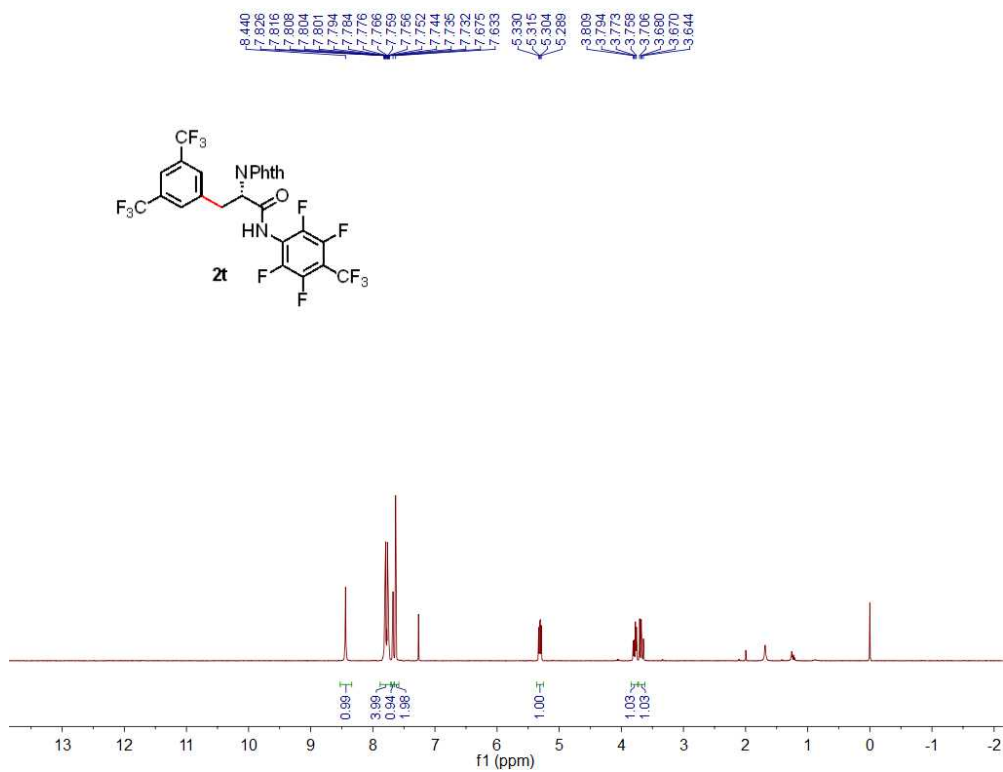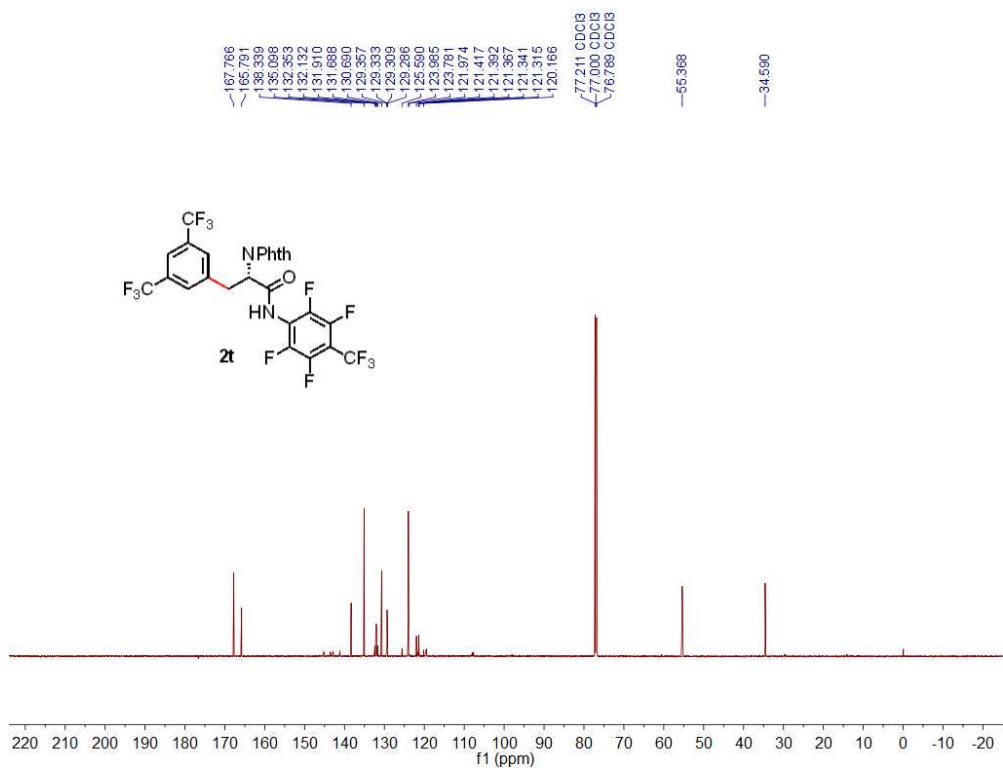

8.539  
8.214  
8.212  
8.201  
8.199  
7.847  
7.835  
7.820  
7.813  
7.802  
7.592  
7.776  
7.762  
7.755  
7.742  
7.167  
7.166  
7.164  
7.162  
7.087  
7.083  
7.074  
7.070

5.366  
5.351  
5.341  
5.325

3.696  
3.670  
3.650  
3.634  
3.621  
3.595  
3.569

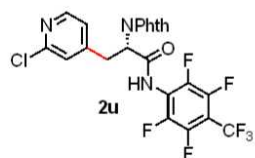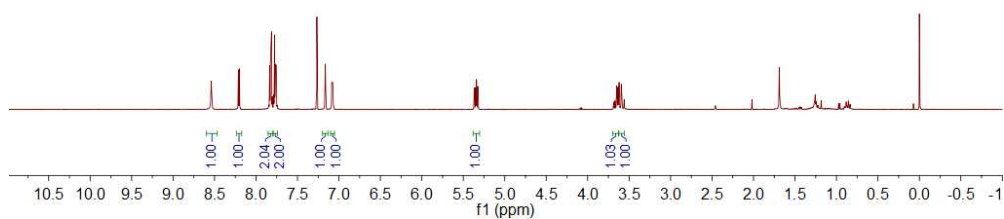

167.628  
166.797  
151.982  
149.905  
148.360

135.044  
130.785  
124.729  
124.668  
122.773

77.318 CDCl3  
77.000 CDCl3  
76.683 CDCl3

-54.501

-34.047

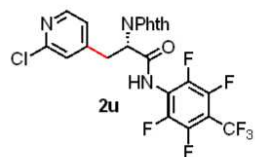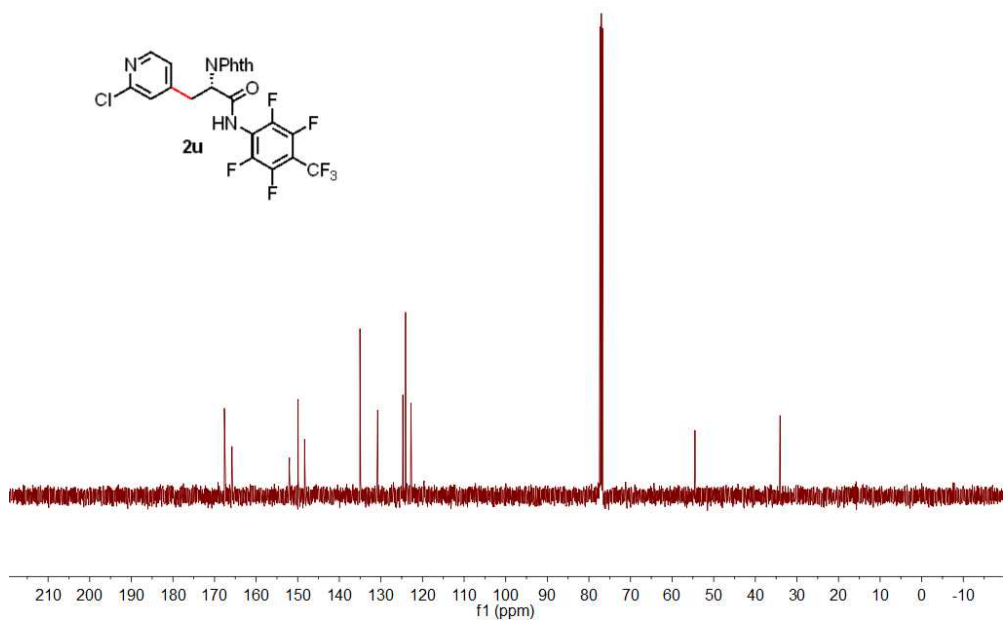

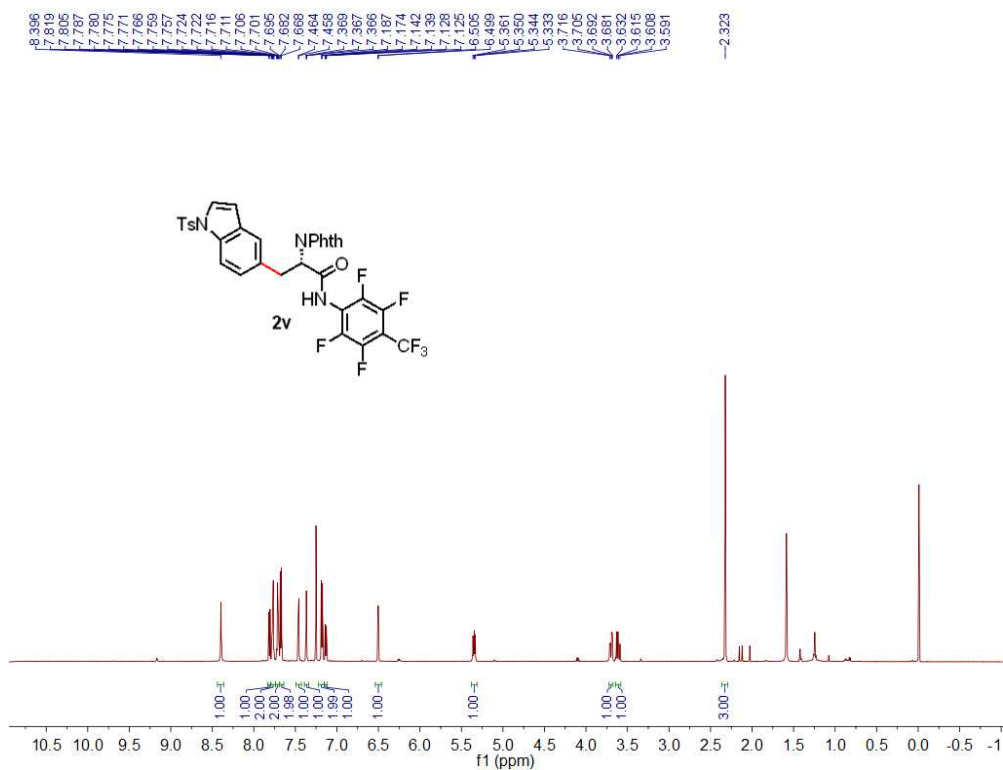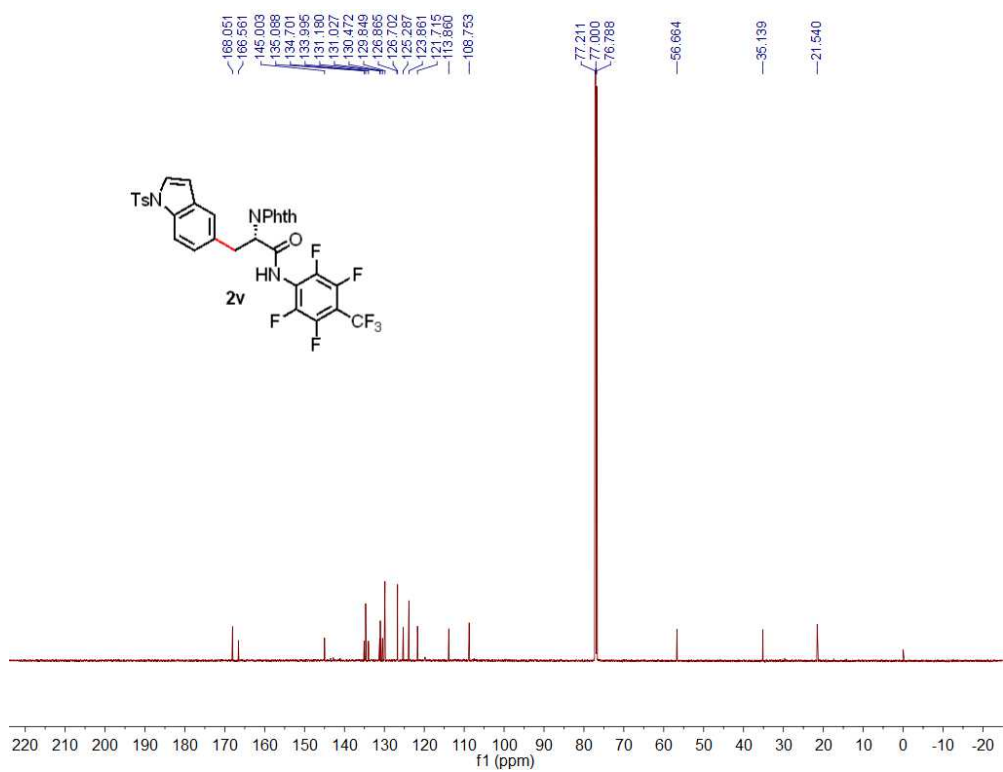

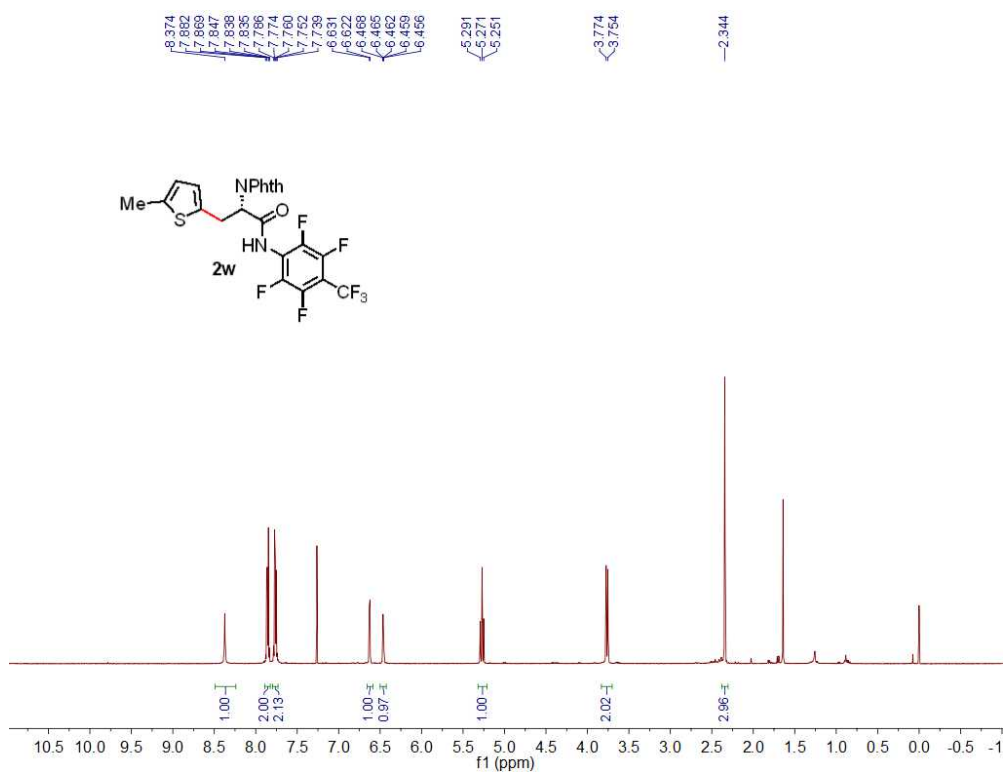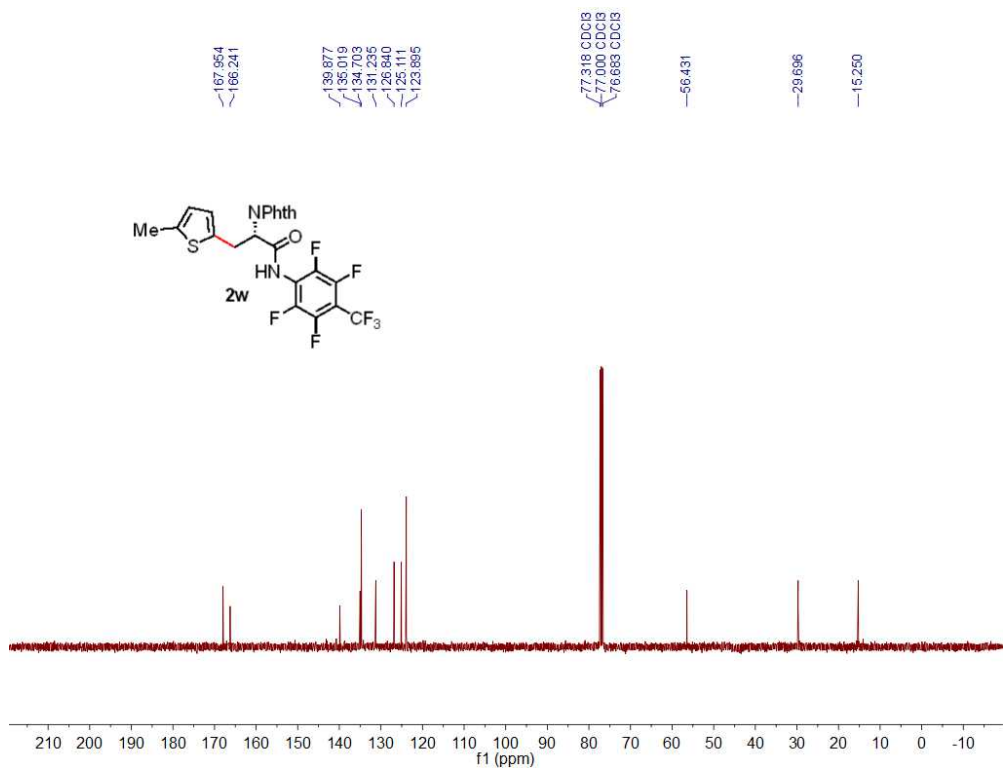



8.696  
7.781  
7.776  
7.772  
7.767  
7.760  
7.692  
7.690  
7.688  
7.681  
7.673  
7.574  
7.562  
7.384  
7.372  
7.369  
7.320  
7.318  
7.306  
7.295  
7.262  
7.164  
7.151  
7.138  
7.063  
7.061  
7.050  
7.038  
5.915  
5.894  
5.557  
5.515

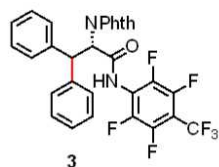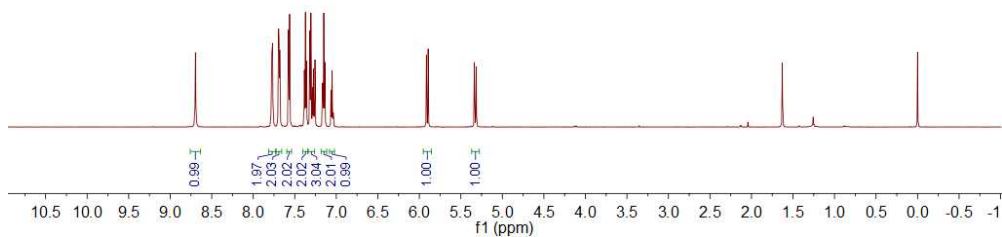

165.268  
139.298  
138.820  
134.605  
130.658  
129.278  
128.898  
128.003  
127.530  
127.420  
123.787  
77.212  
77.000  
76.788  
58.095  
50.936

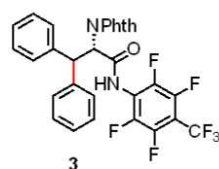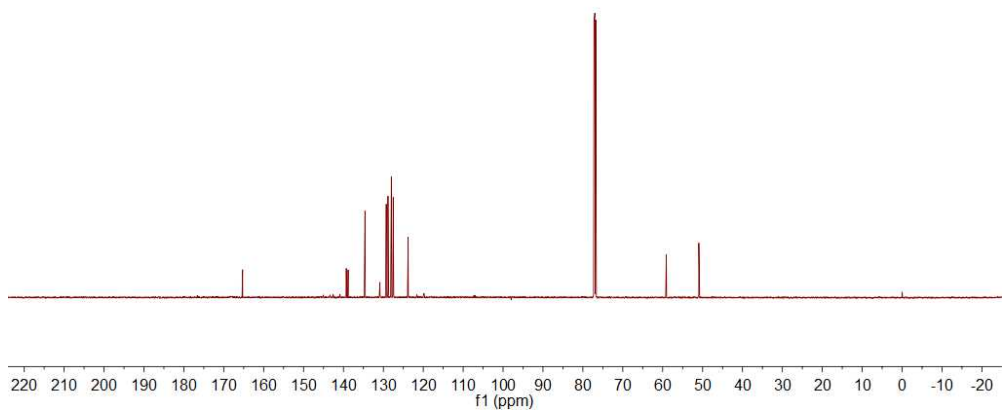

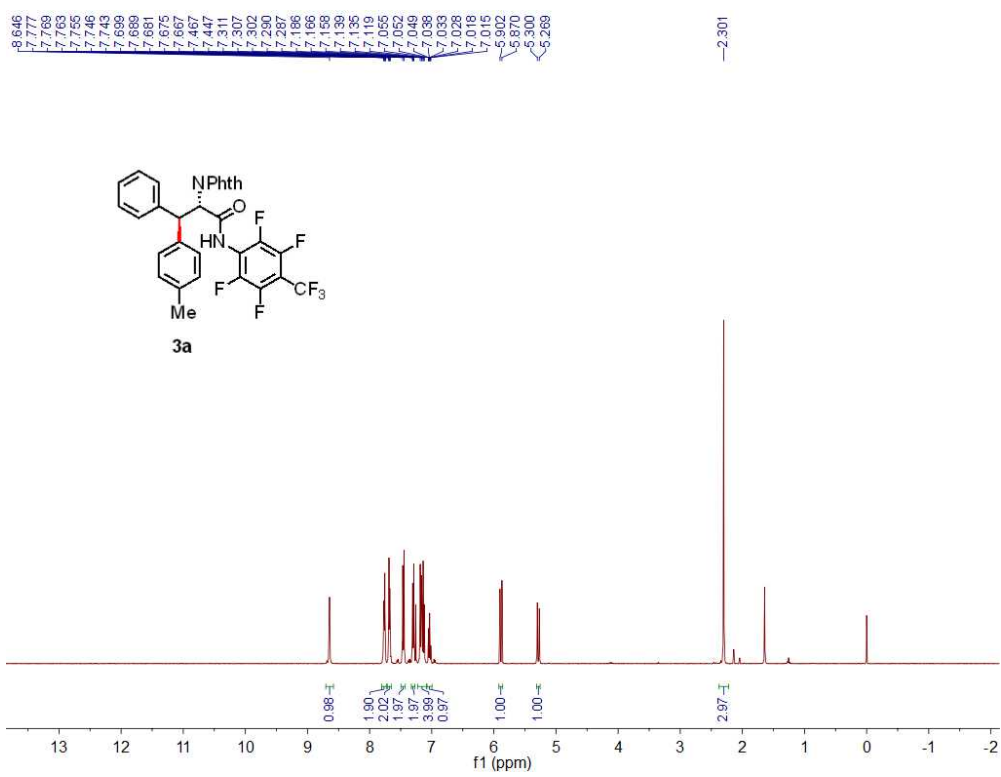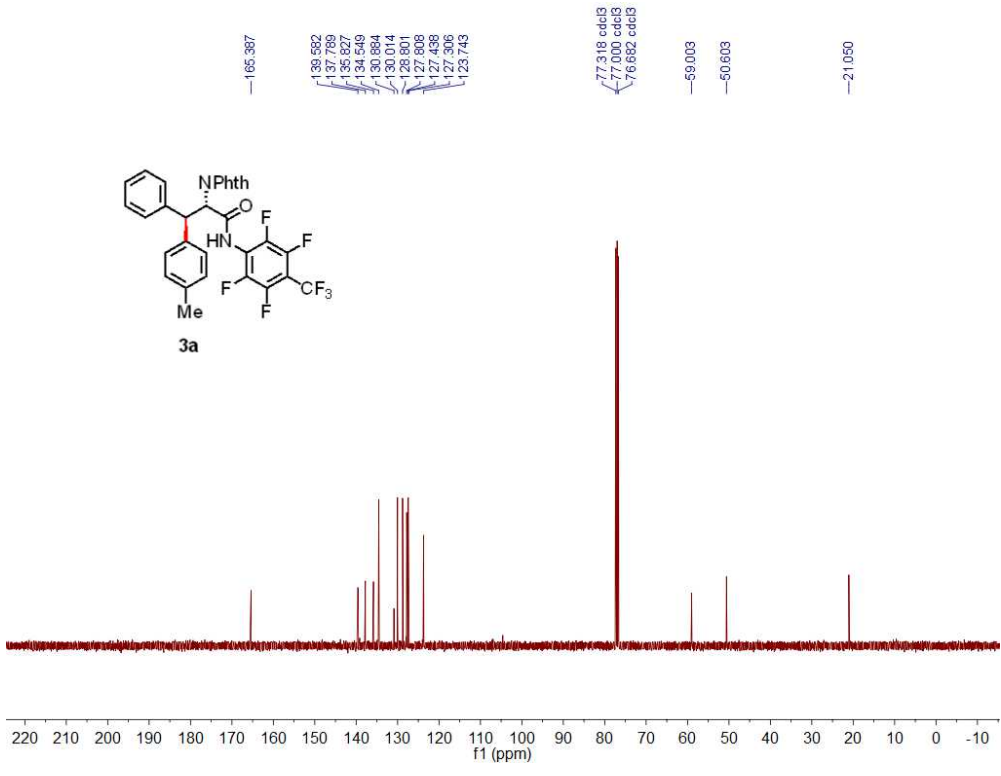

8.544  
7.762  
7.774  
7.769  
7.769  
7.760  
7.753  
7.698  
7.693  
7.695  
7.690  
7.676  
7.671  
7.663  
7.386  
7.372  
7.359  
7.304  
7.276  
7.263  
7.255  
7.251  
7.161  
7.149  
7.136  
7.092  
7.079  
7.068  
7.046  
5.904  
5.883  
5.296  
5.275  
-2.348

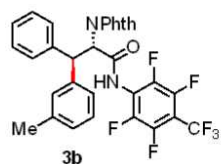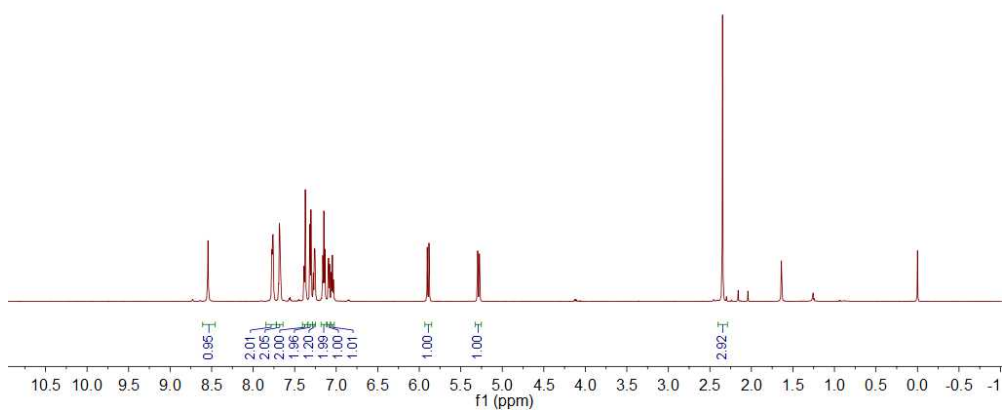

165.321  
139.467  
139.123  
138.811  
134.534  
130.908  
128.635  
128.635  
128.806  
128.762  
127.521  
127.345  
124.864  
123.740  
77.211  
77.000  
76.788  
58.891  
50.842  
21.465

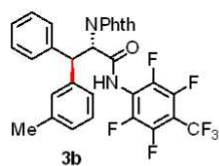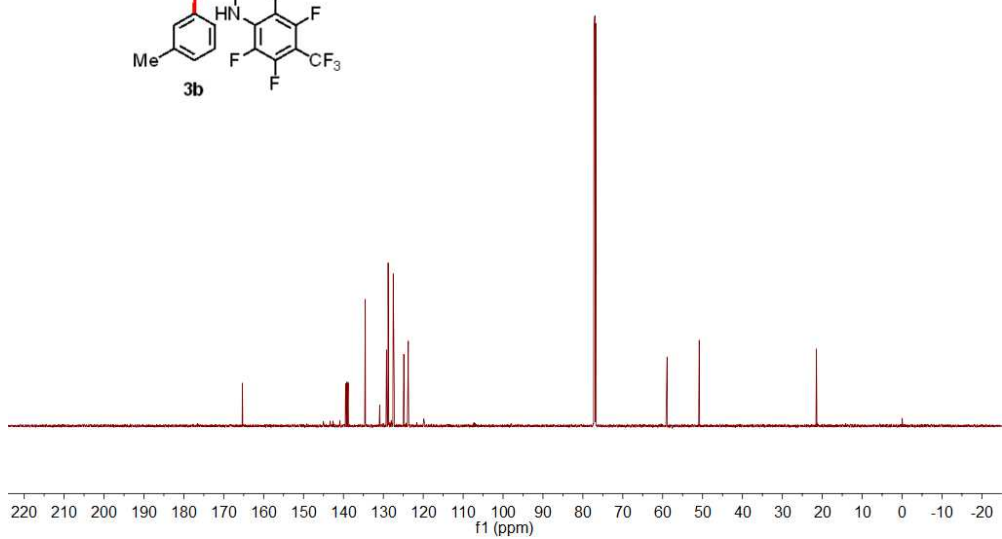

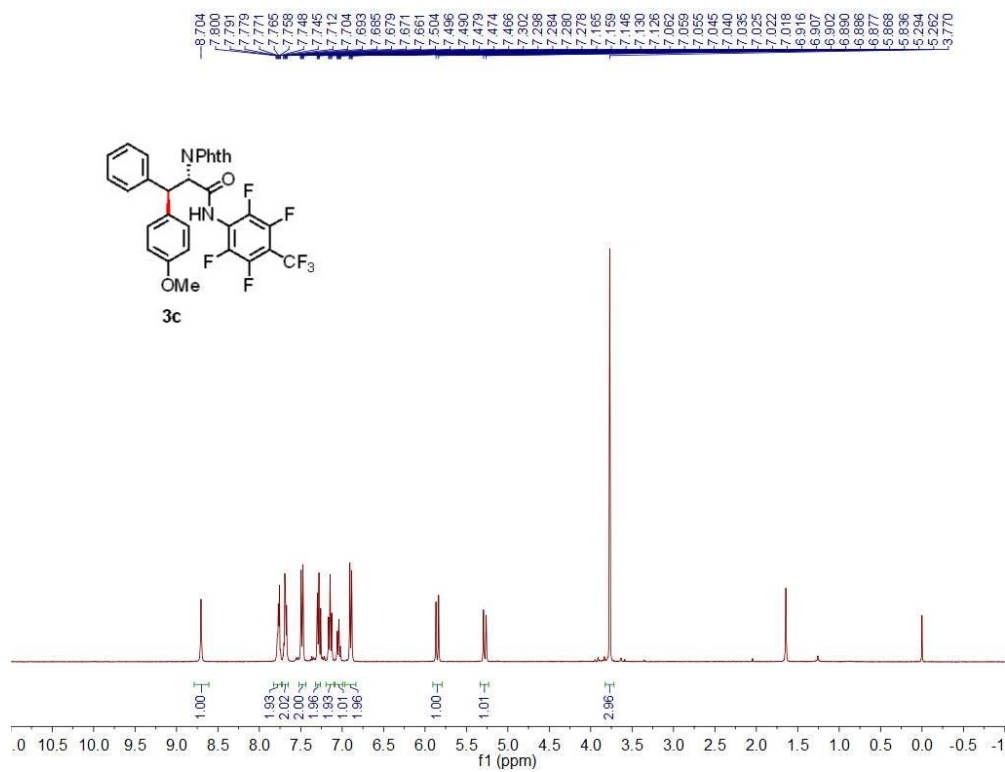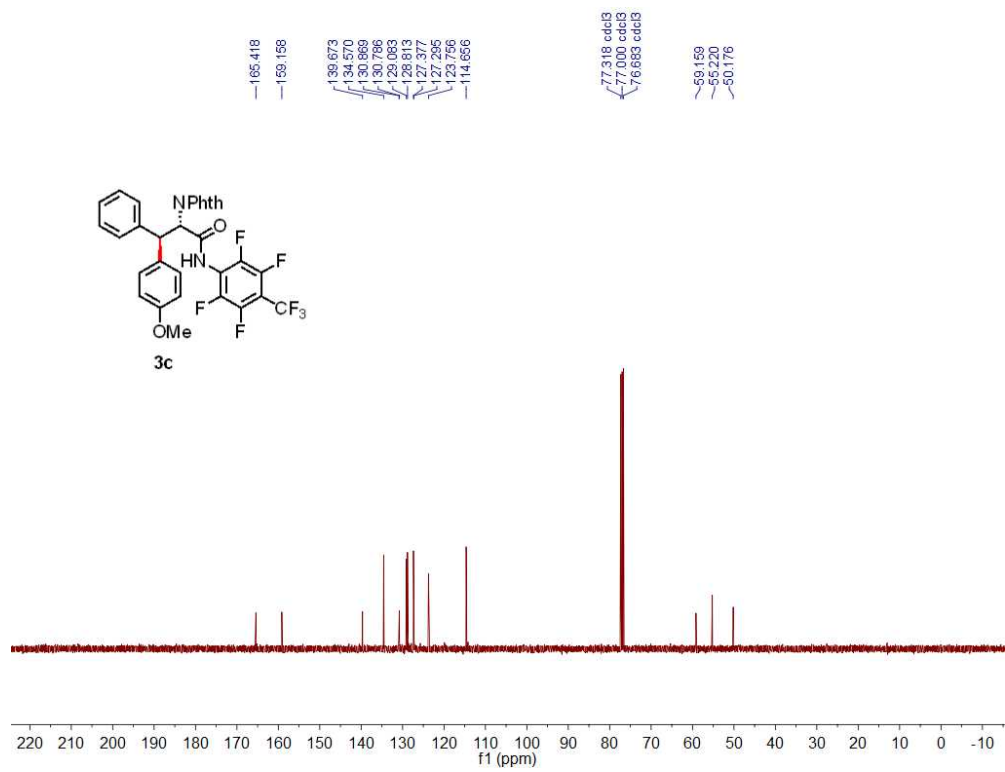

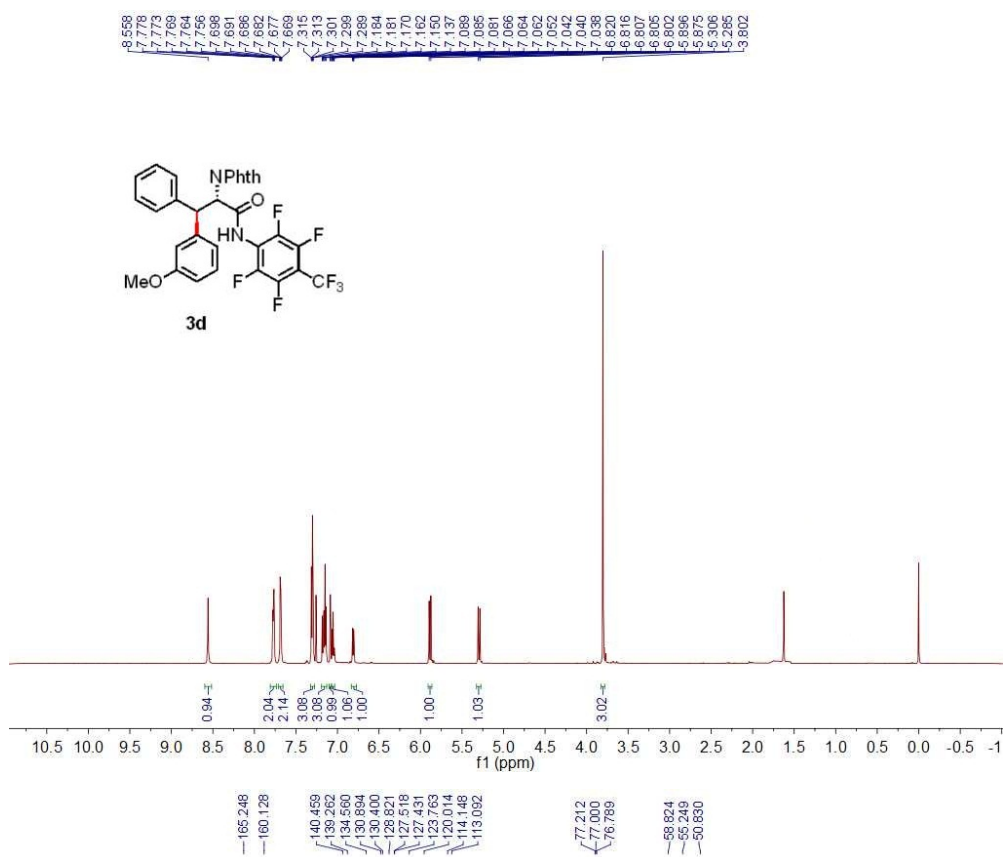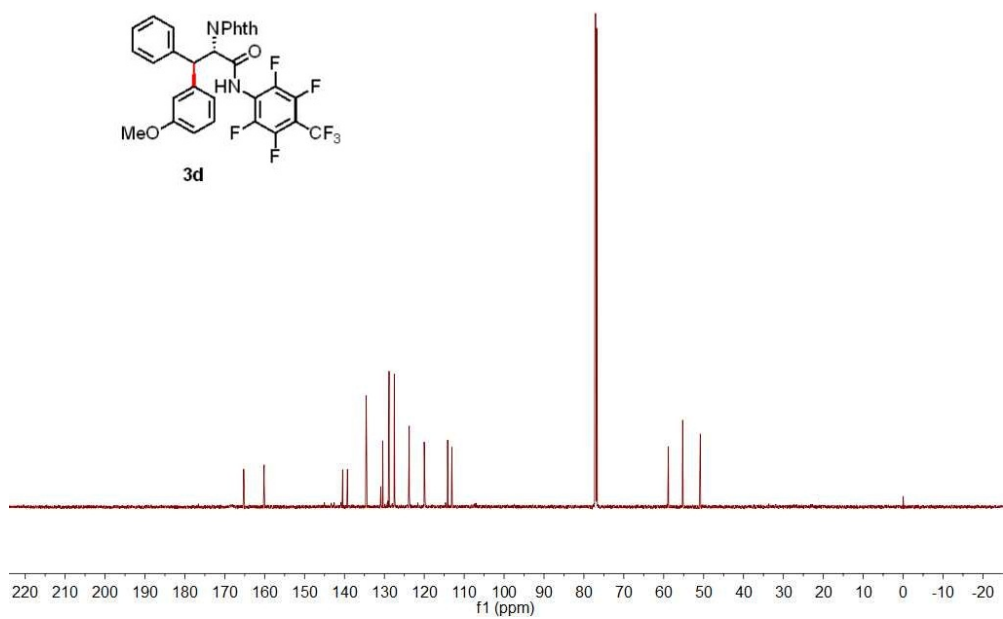

8.928  
7.797  
7.788  
7.762  
7.774  
7.774  
7.766  
7.718  
7.710  
7.705  
7.701  
7.696  
7.689  
7.593  
7.524  
7.519  
7.500  
7.492  
7.269  
7.175  
7.162  
7.149  
7.081  
7.068  
7.061  
7.056  
7.047  
7.033  
6.845  
6.824  
5.354  
5.314

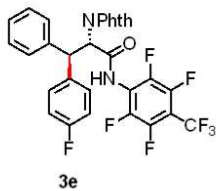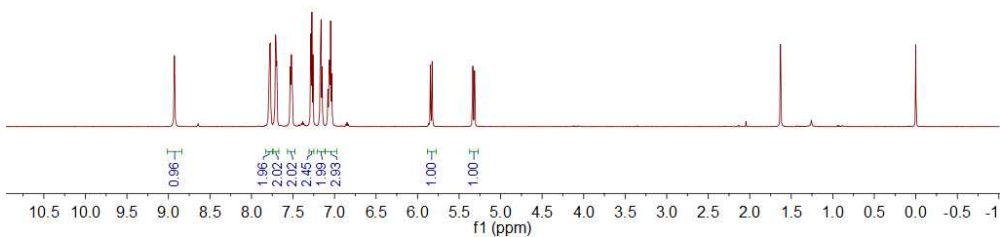

165.218  
163.016  
161.378  
138.977  
134.734  
134.546  
130.527  
129.710  
129.656  
128.943  
127.583  
127.446  
123.868  
116.146  
116.003  
77.211  
77.000  
76.788  
59.398  
50.164

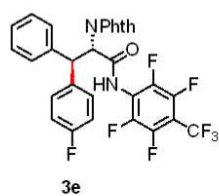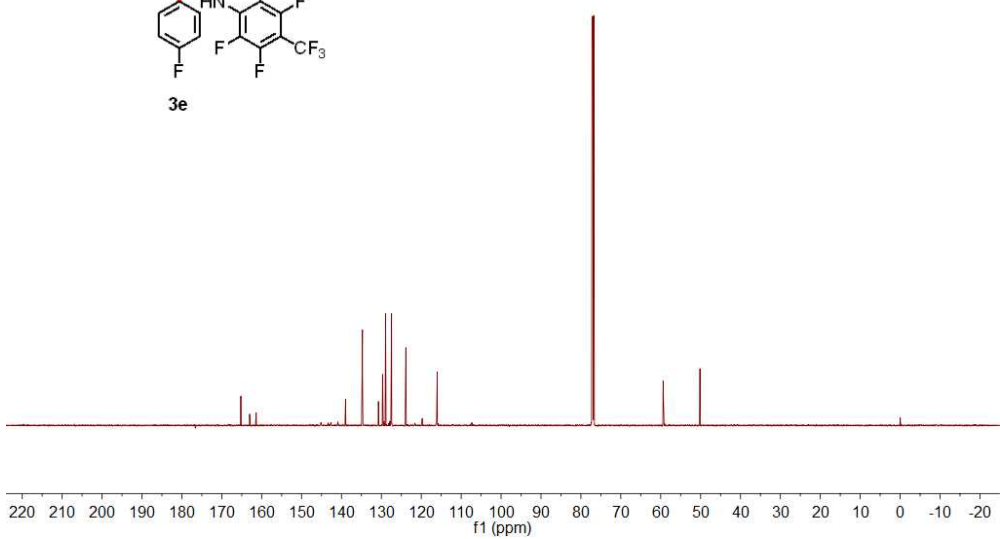

8.919  
7.792  
7.786  
7.780  
7.776  
7.771  
7.764  
7.717  
7.710  
7.705  
7.700  
7.695  
7.689  
7.683  
7.424  
7.331  
7.272  
7.170  
7.259  
7.157  
7.144  
7.079  
7.067  
7.054  
5.844  
5.826  
5.325  
5.303

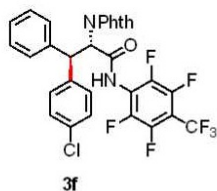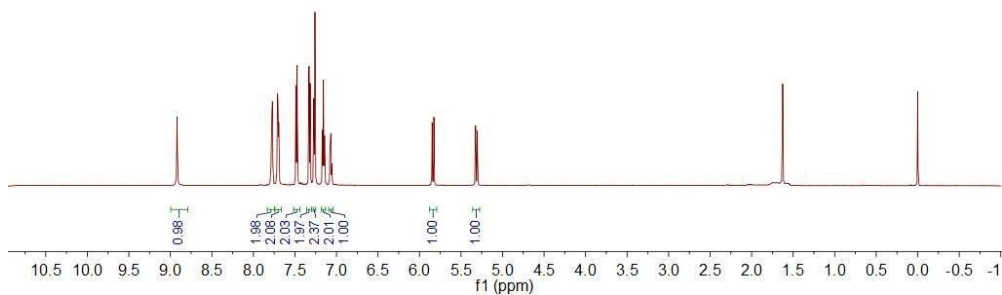

165.155  
138.721  
137.274  
134.754  
133.778  
130.726  
129.558  
128.680  
127.660  
127.475  
123.880  
77.211  
77.000  
76.789  
58.163  
50.282

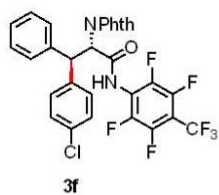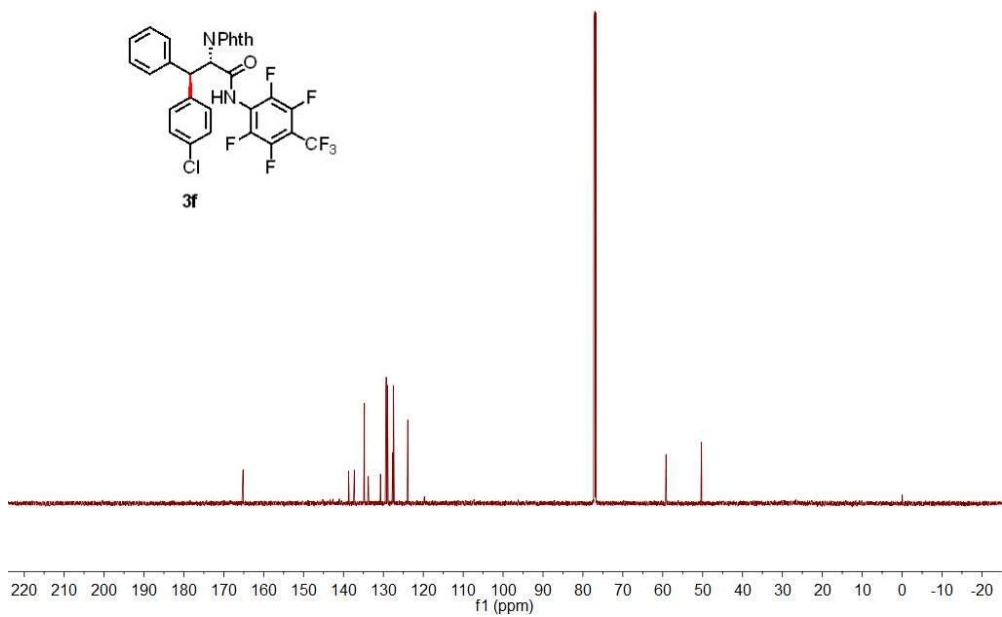

8.909  
7.789  
7.785  
7.780  
7.775  
7.770  
7.765  
7.760  
7.719  
7.714  
7.711  
7.705  
7.702  
7.699  
7.697  
7.485  
7.471  
7.427  
7.413  
7.287  
7.280  
7.255  
7.169  
7.156  
7.144  
7.082  
7.080  
7.078  
7.067  
7.057  
7.055  
5.894  
5.860  
5.288

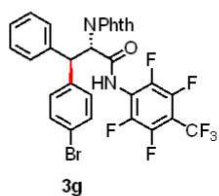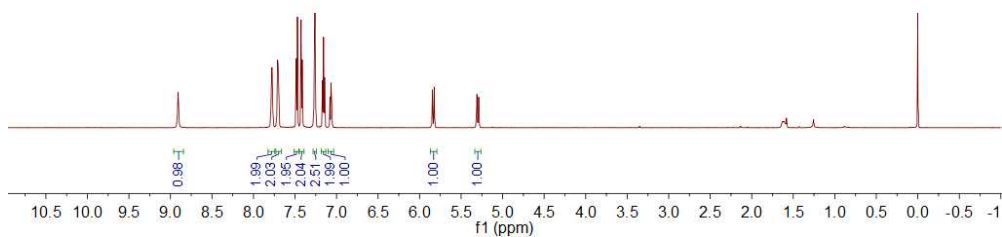

165.140  
138.637  
137.600  
134.763  
132.229  
130.721  
129.682  
128.978  
127.878  
127.485  
123.994  
121.924  
77.212  
77.000  
76.789  
58.083  
50.357

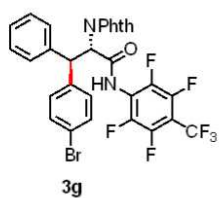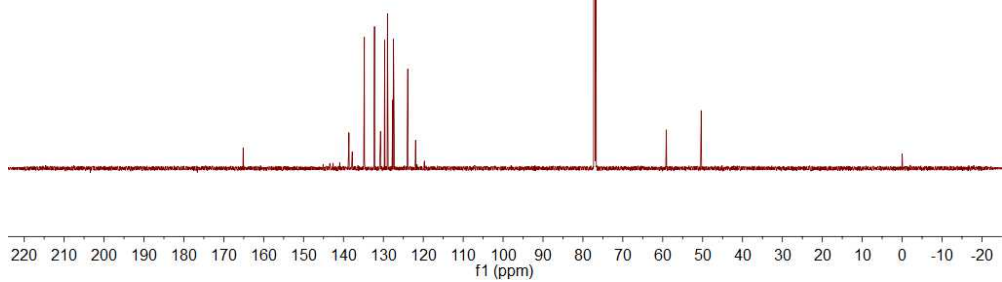



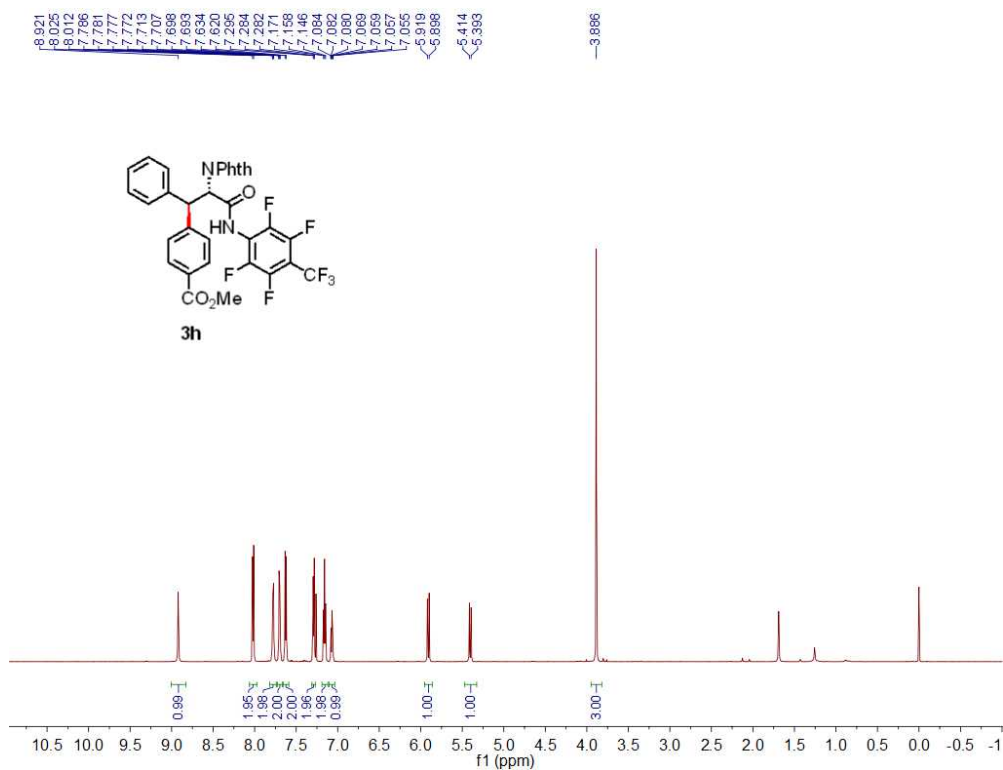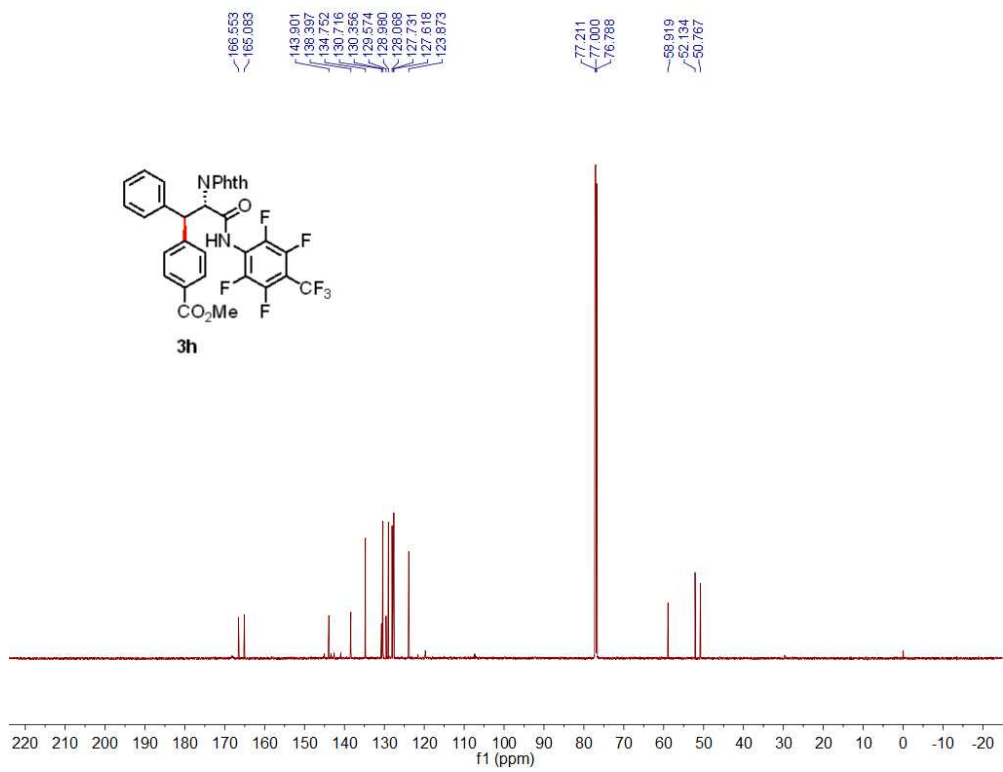

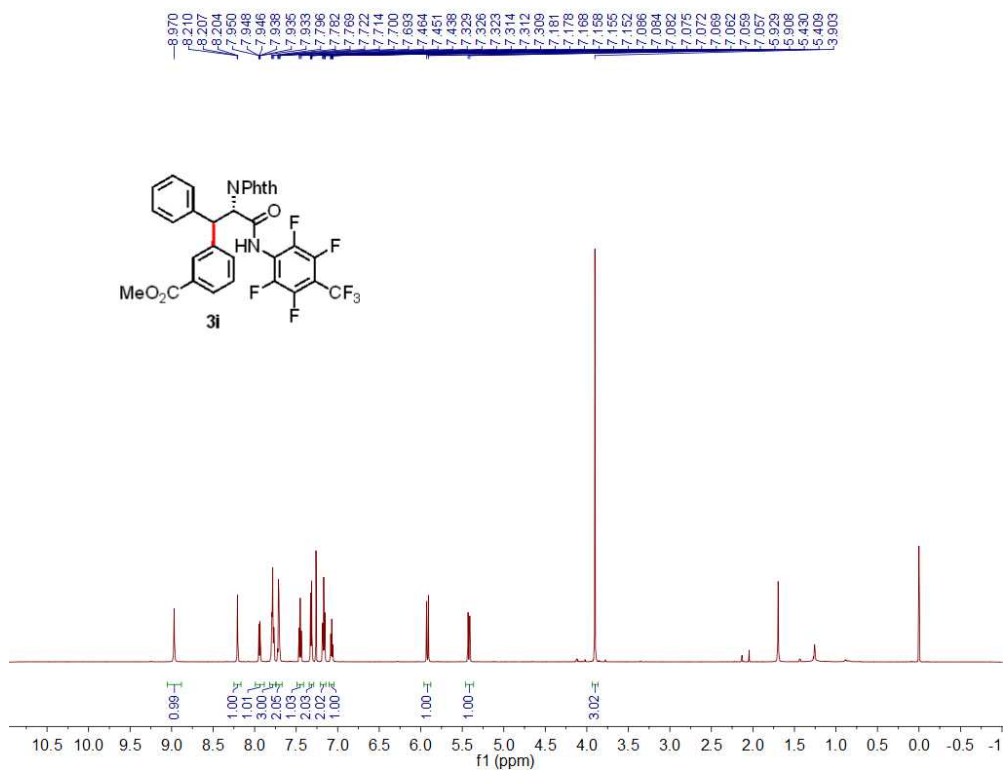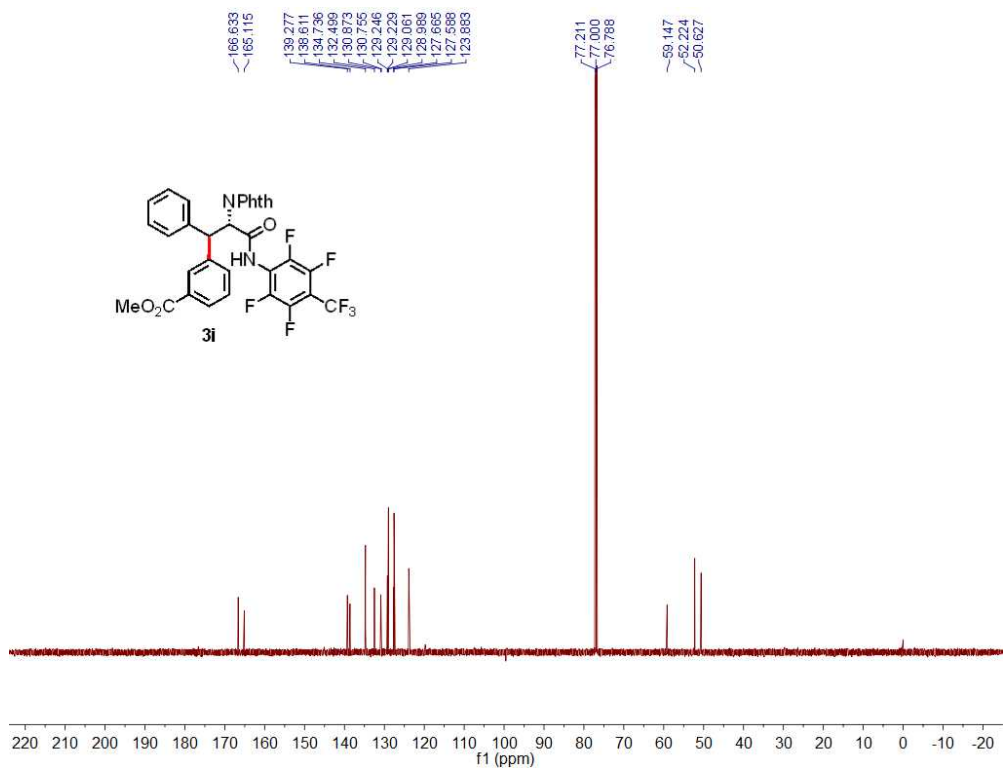

9.780  
7.809  
7.803  
7.830  
7.808  
7.803  
7.800  
7.795  
7.716  
7.709  
7.704  
7.699  
7.694  
7.687  
7.618  
7.604  
7.593  
7.591  
7.553  
7.346  
7.345  
7.342  
7.340  
7.330  
7.187  
7.154  
7.141  
7.083  
7.081  
7.070  
7.058  
7.056  
6.780  
6.020  
5.998  
-4.005

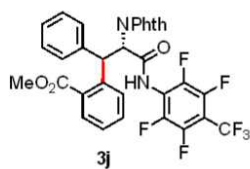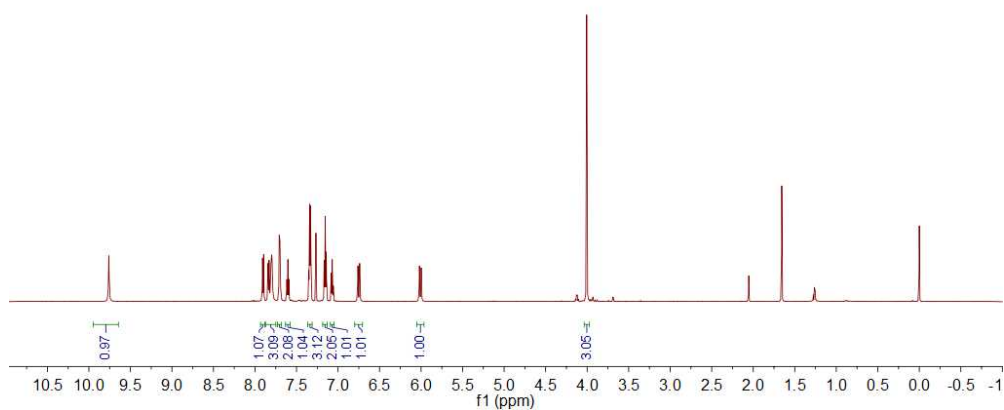

169.532  
165.195  
140.001  
138.908  
134.527  
132.828  
131.006  
129.501  
128.856  
128.042  
127.646  
127.494  
123.781

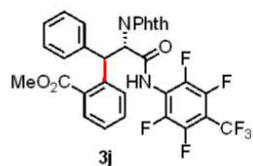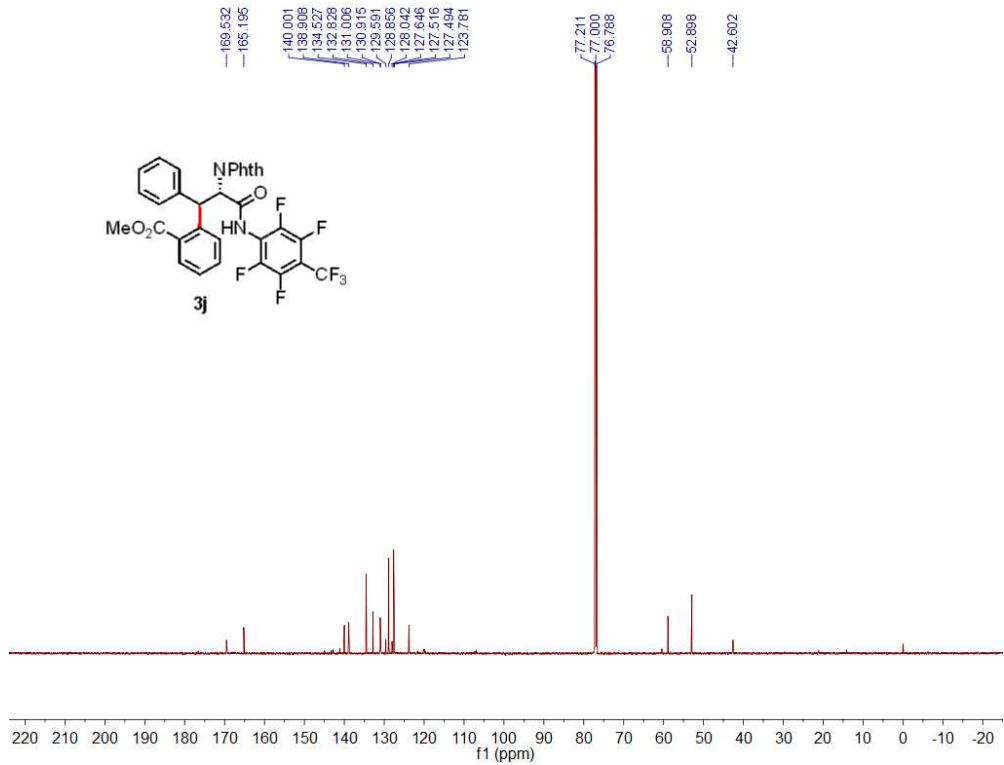

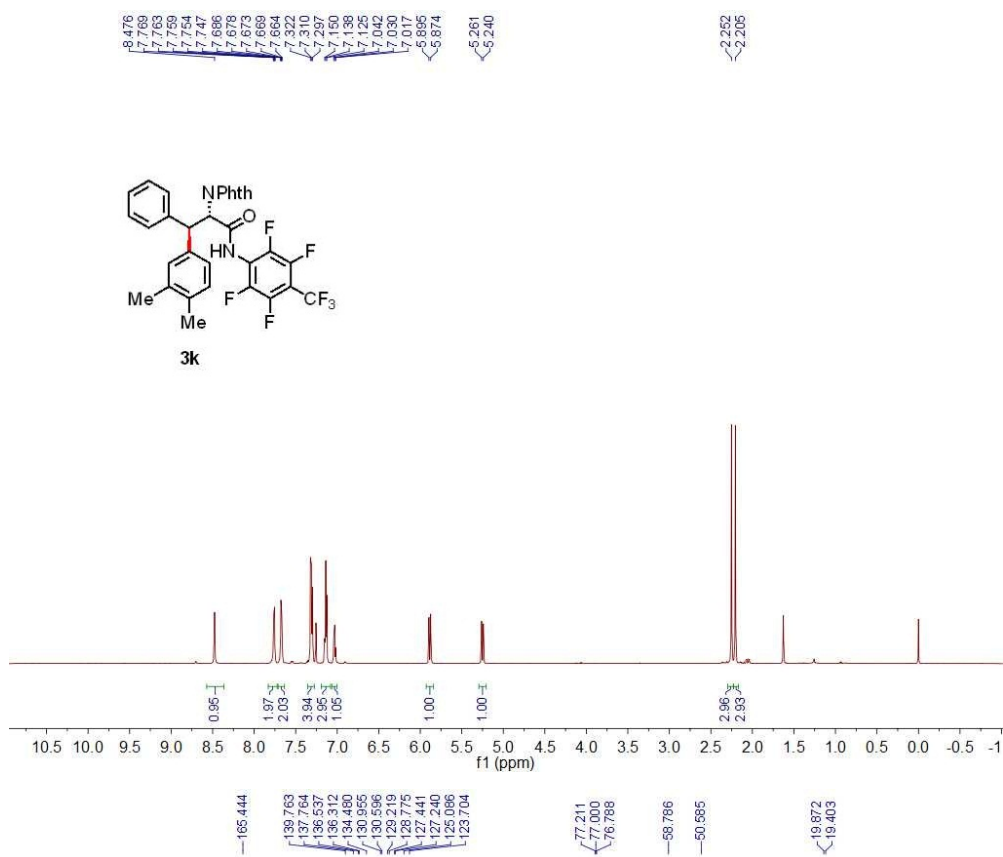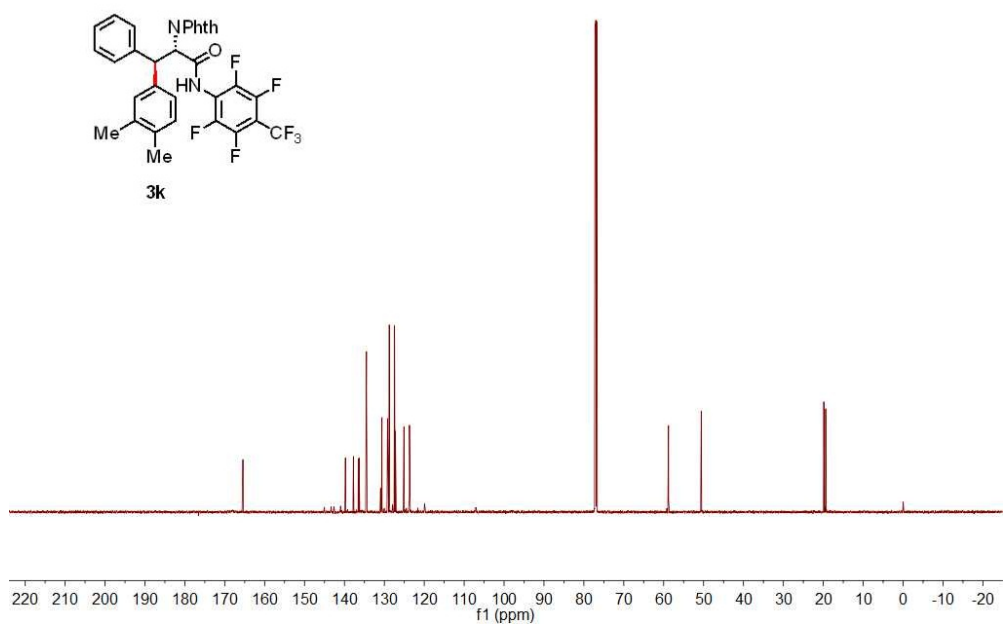

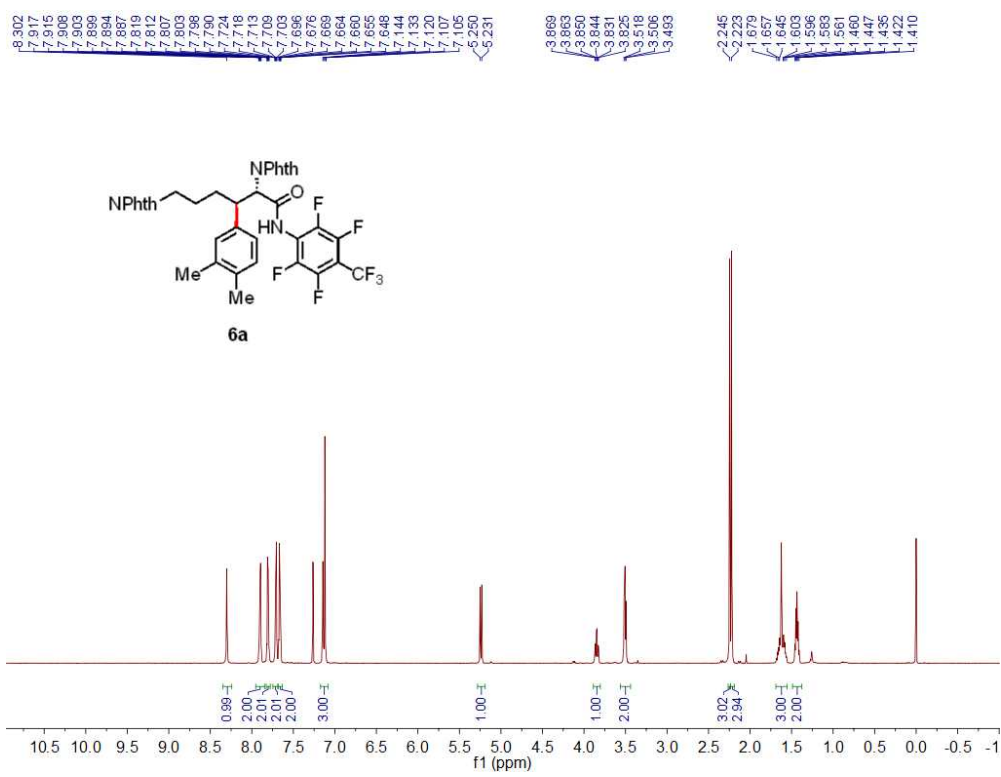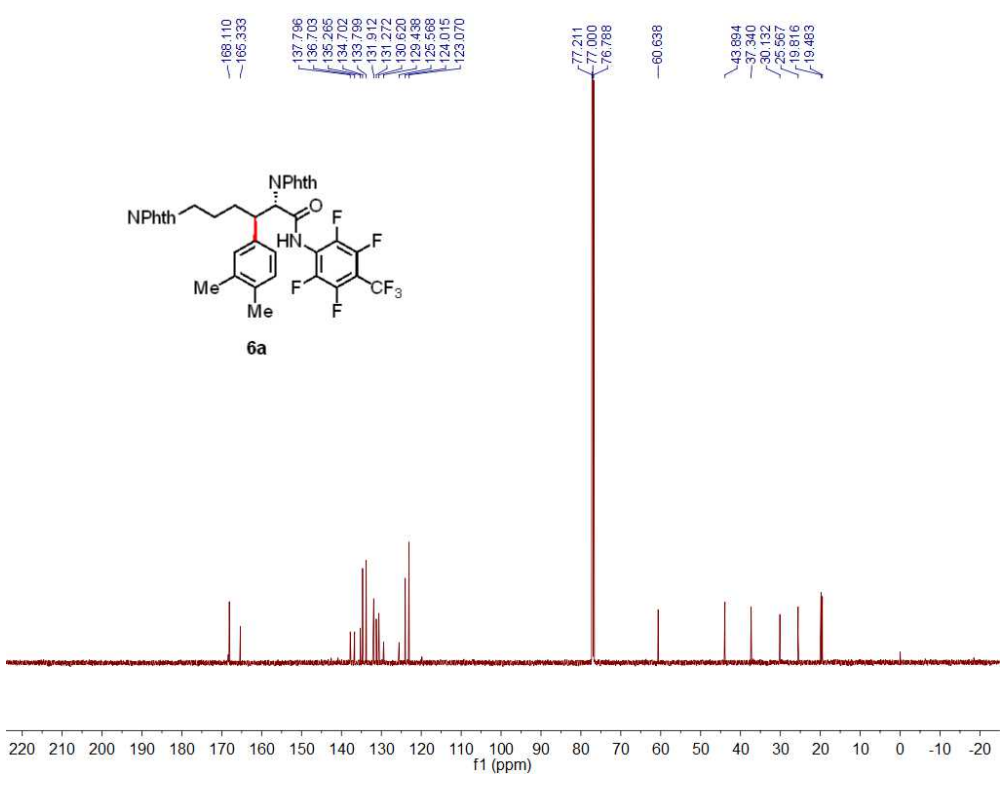

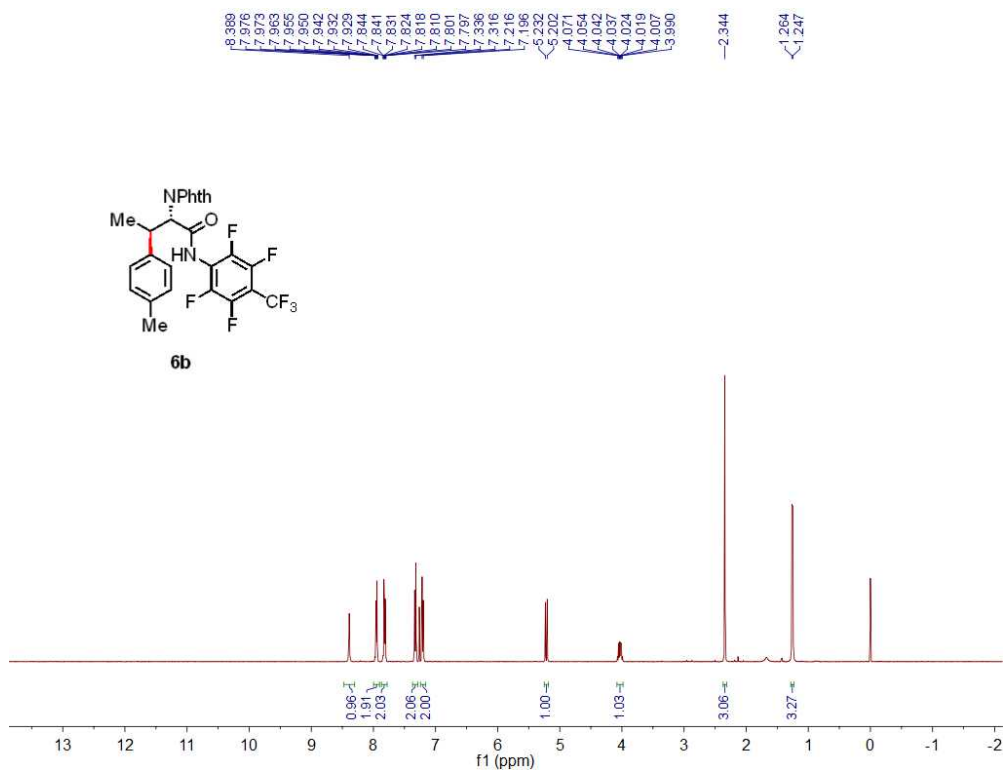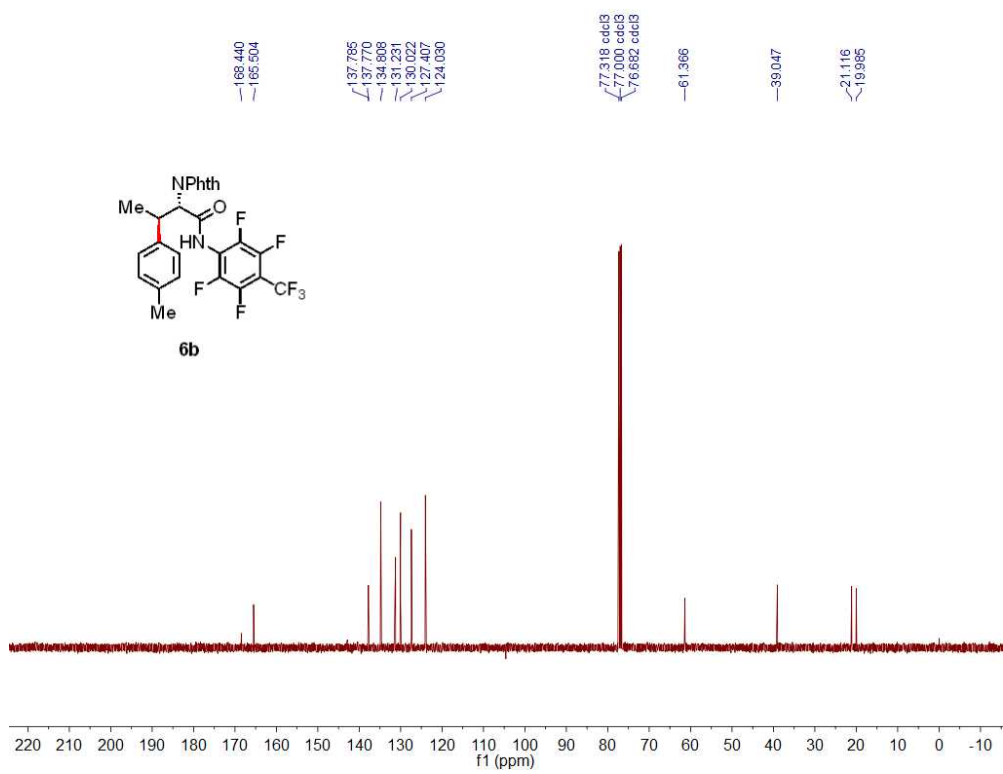

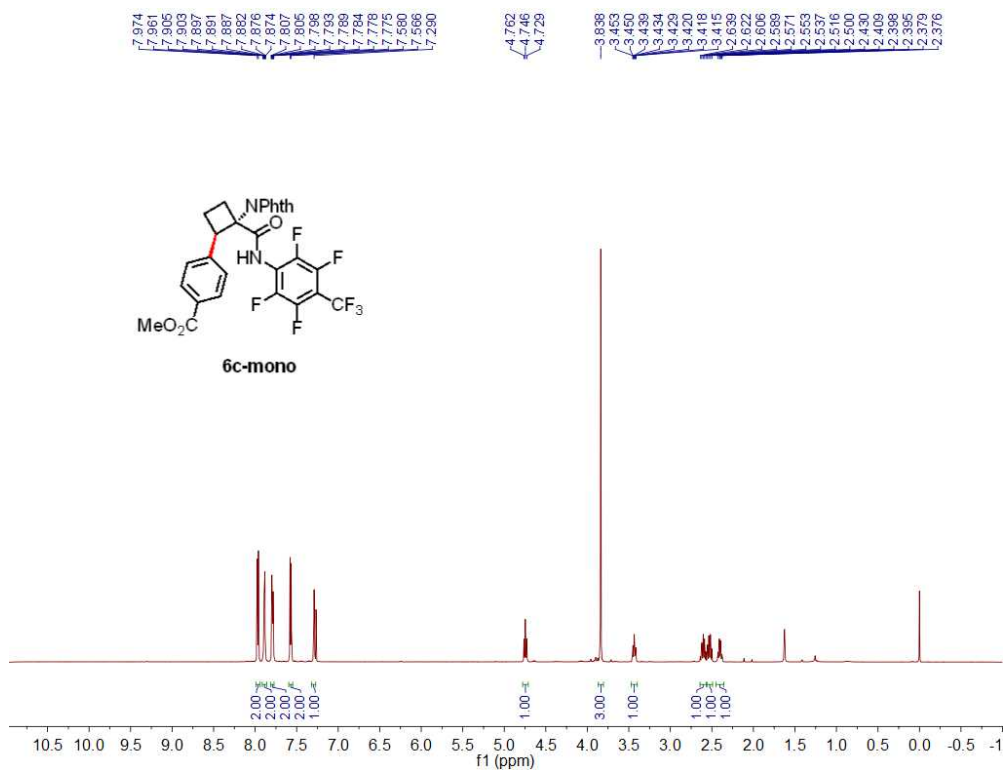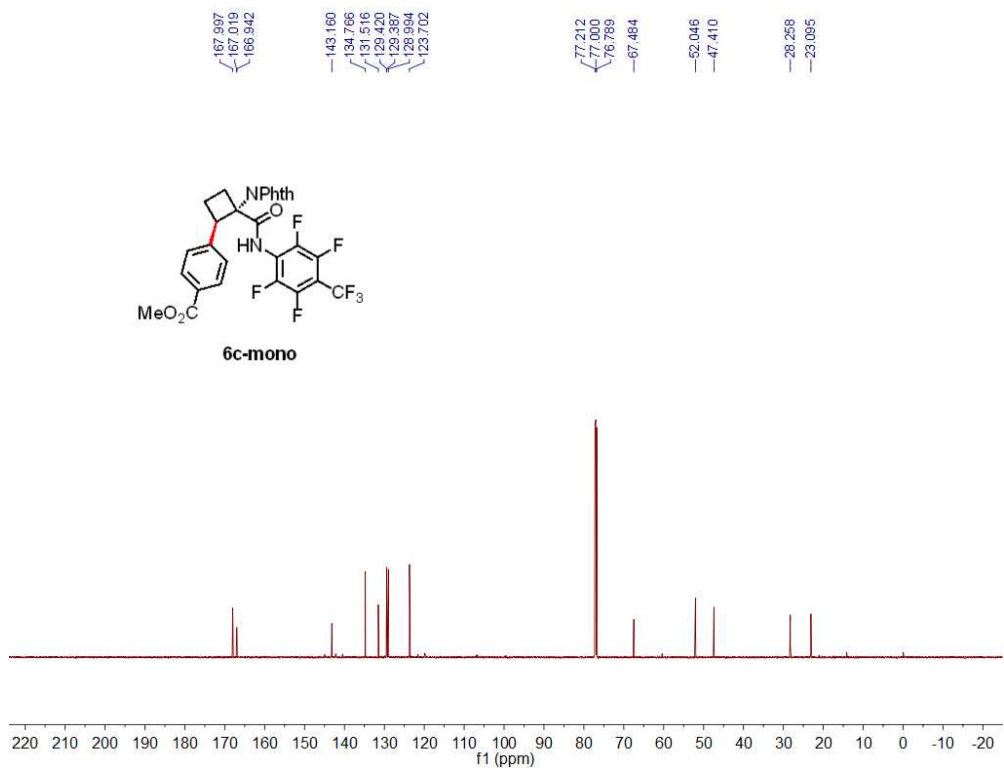

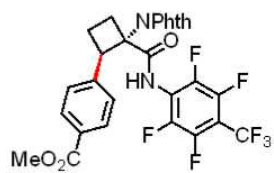

6c-mono

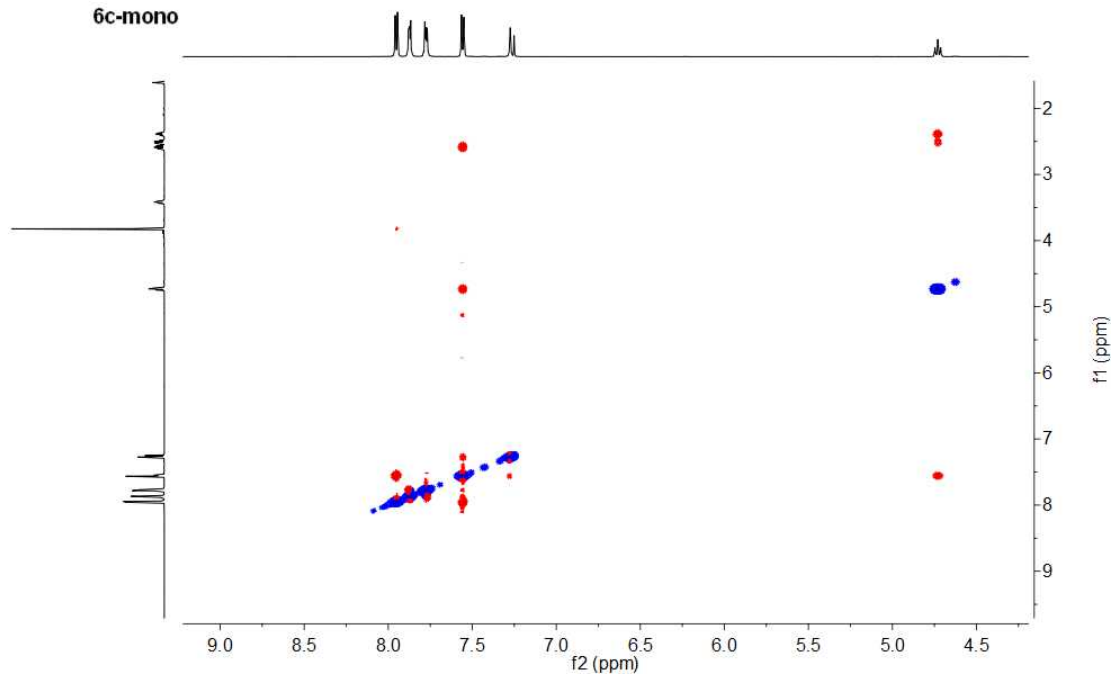



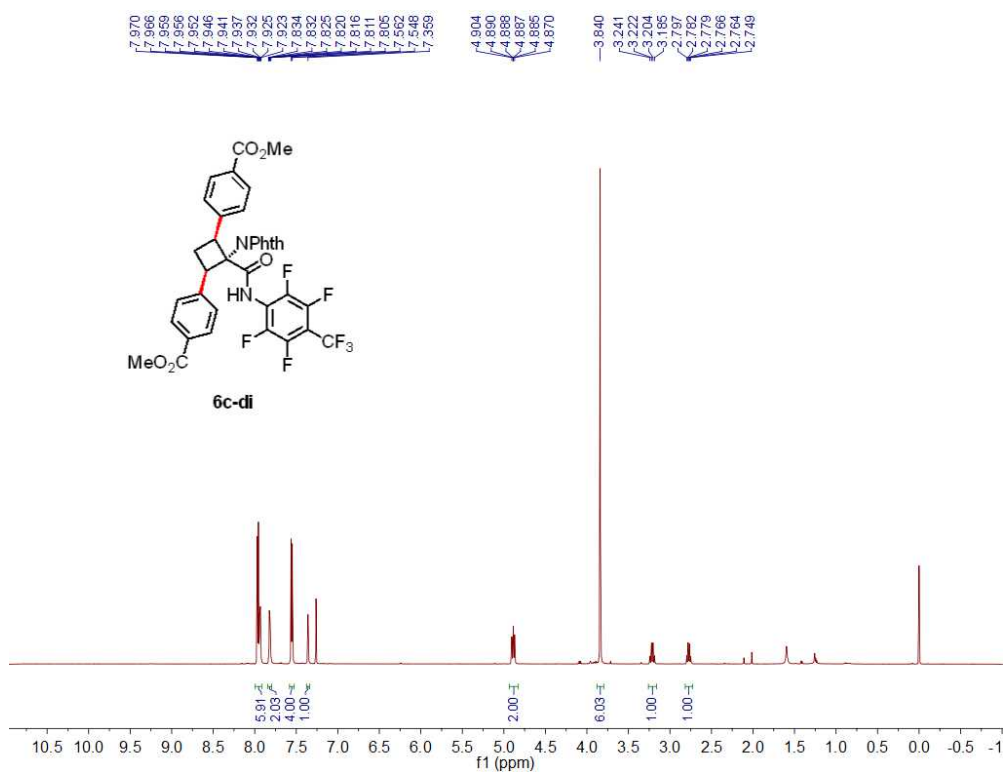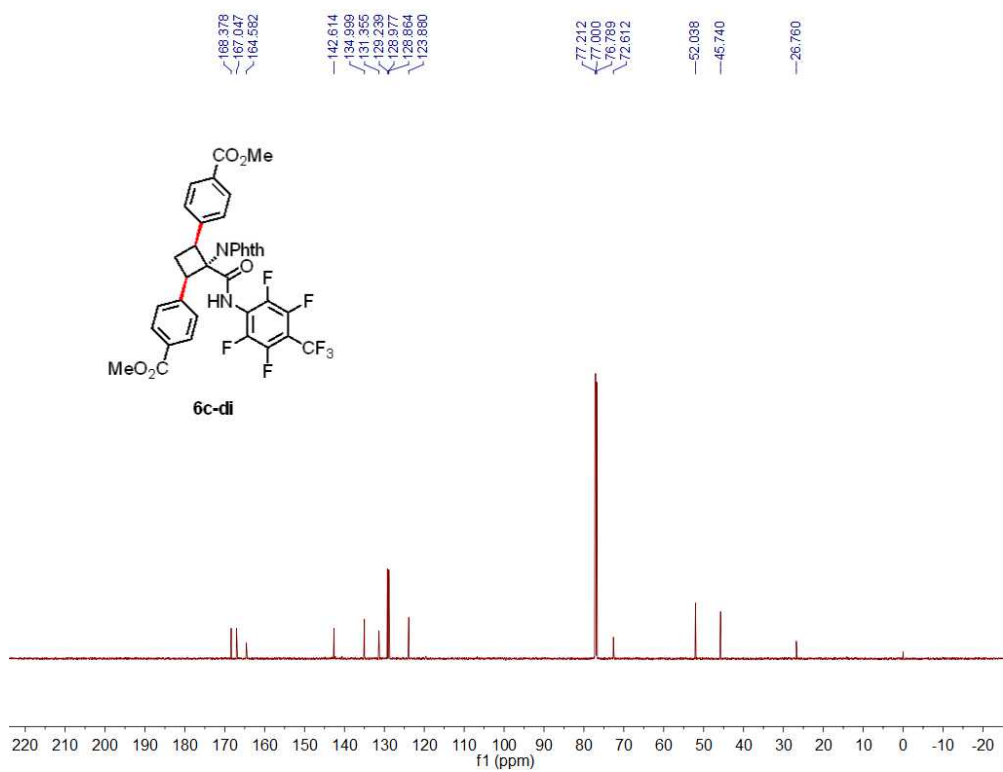

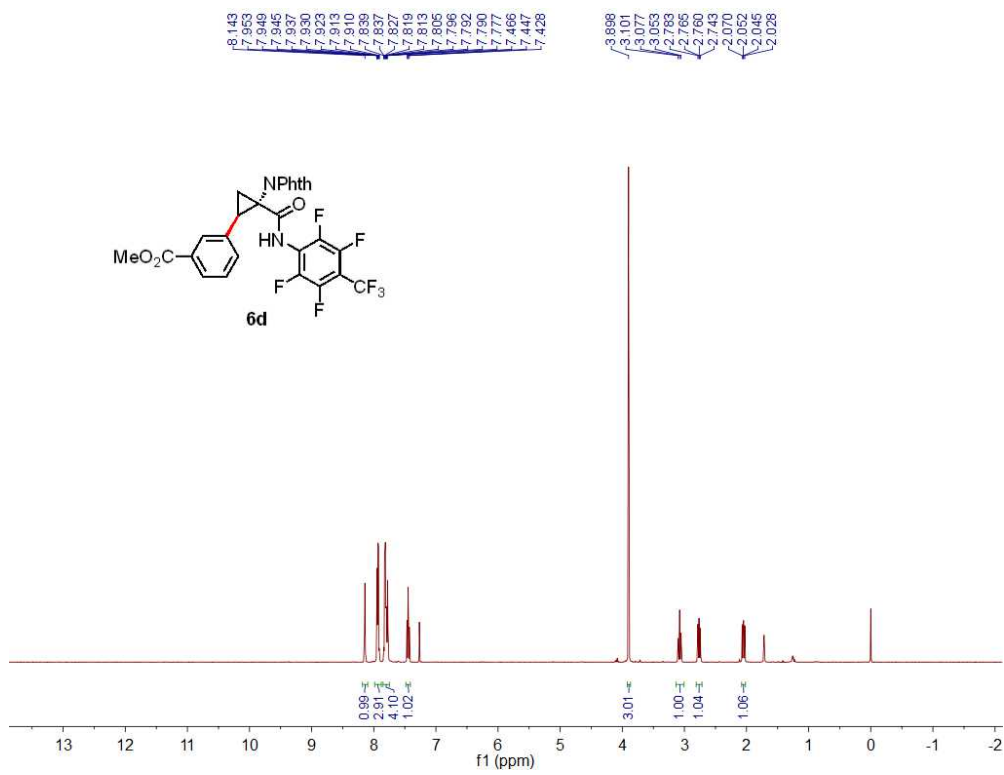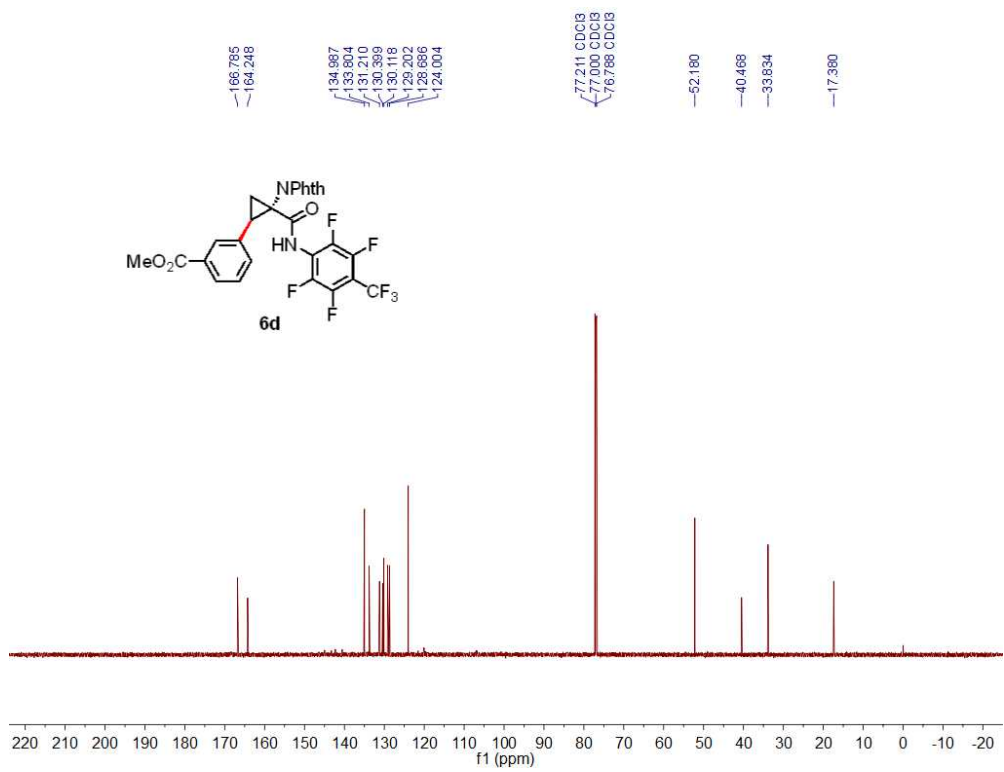

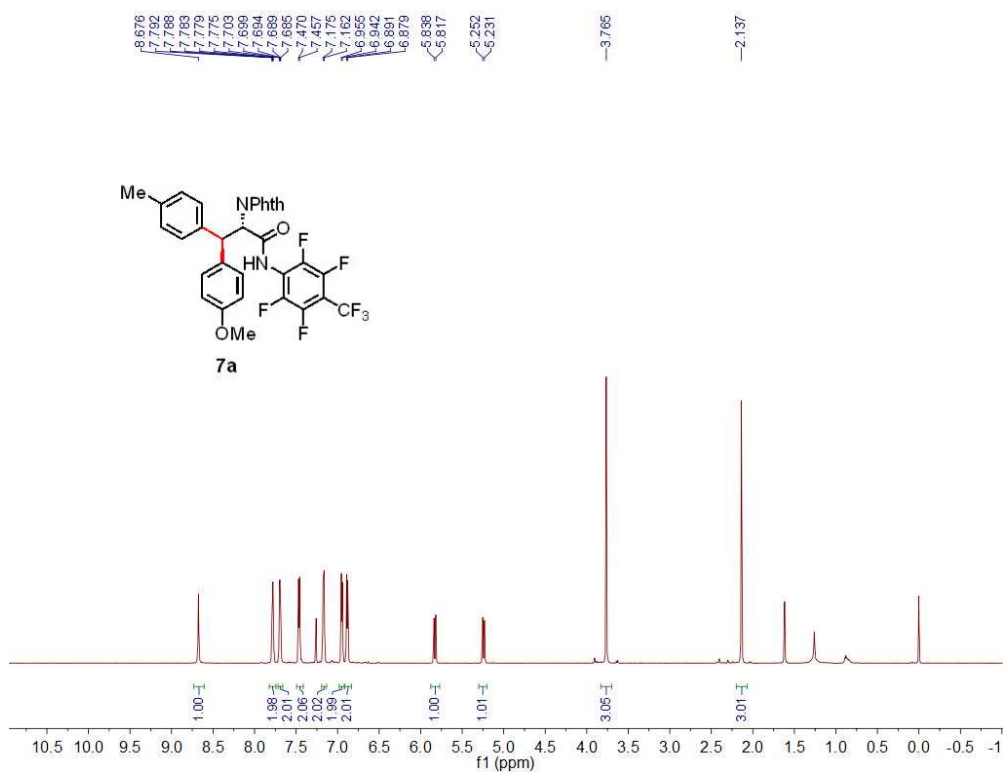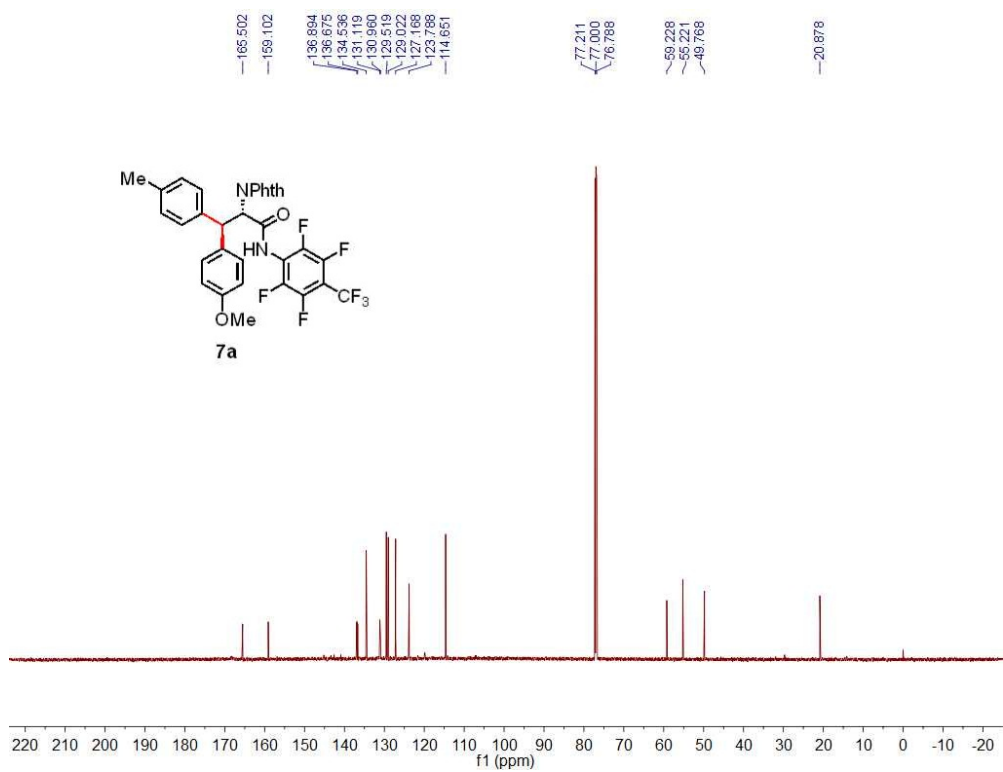

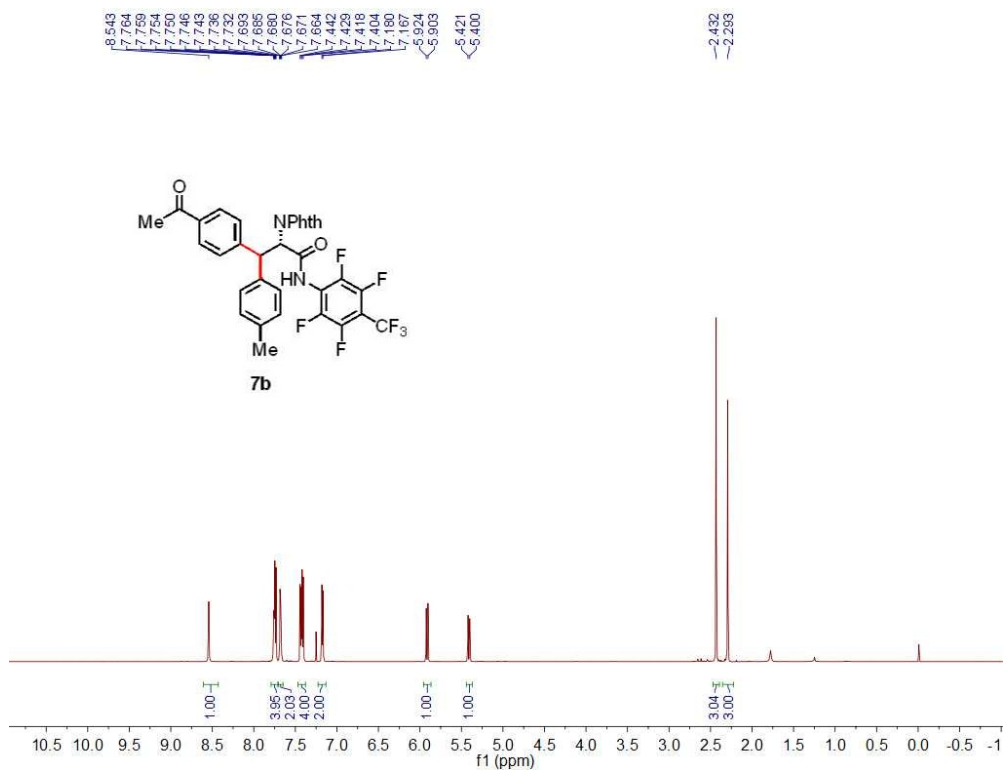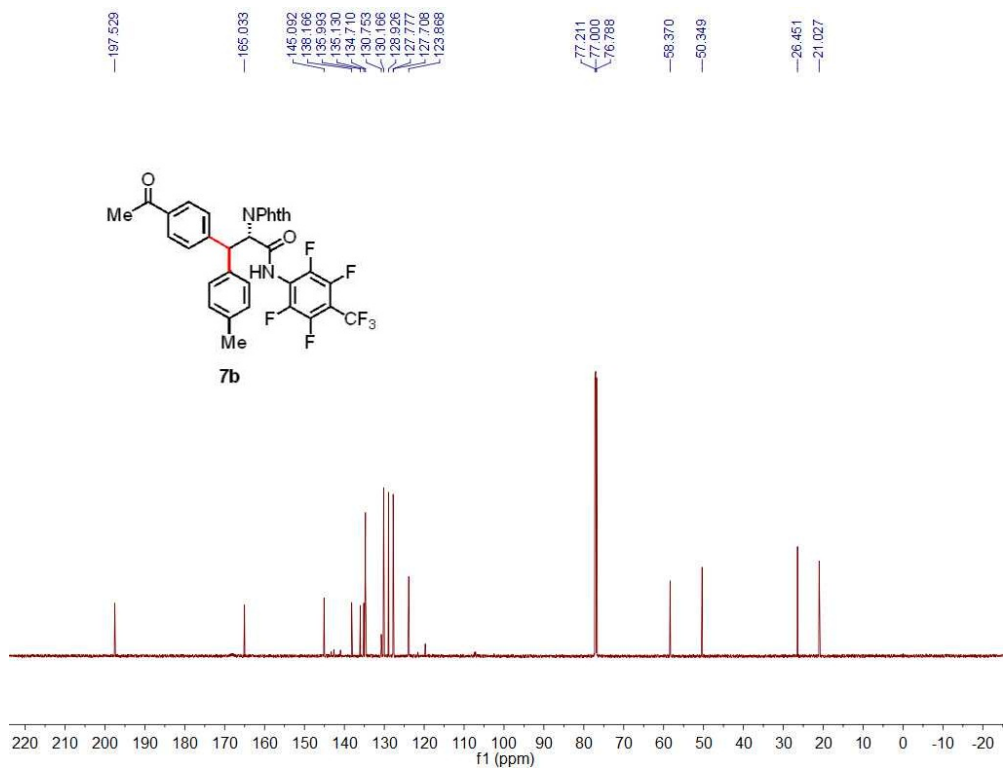

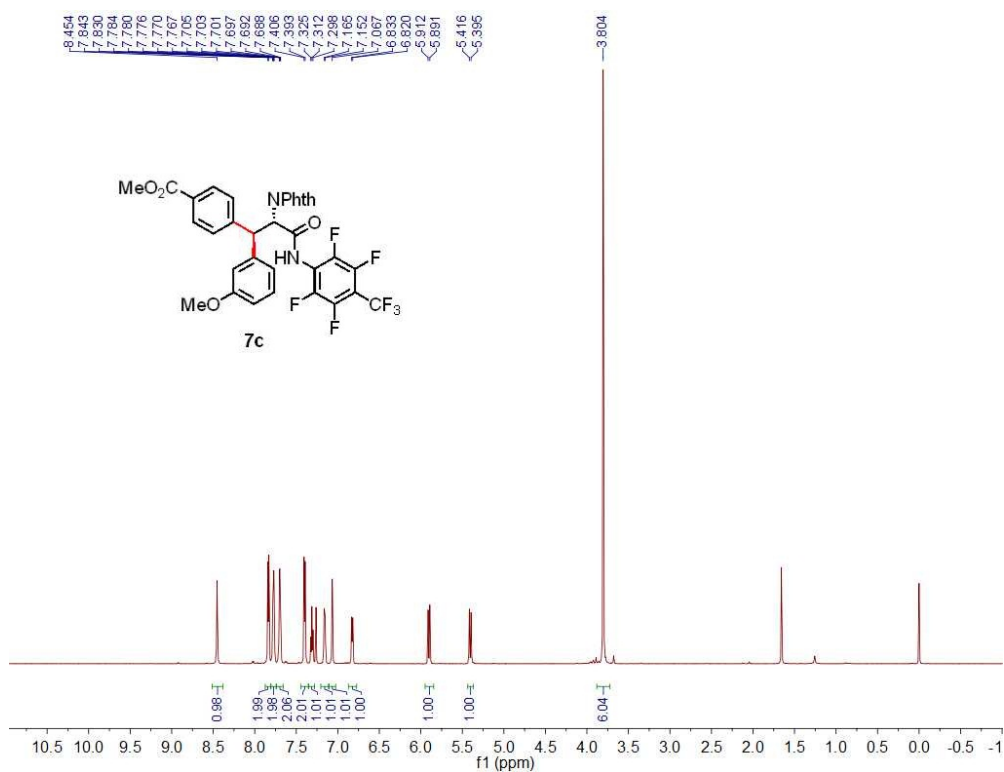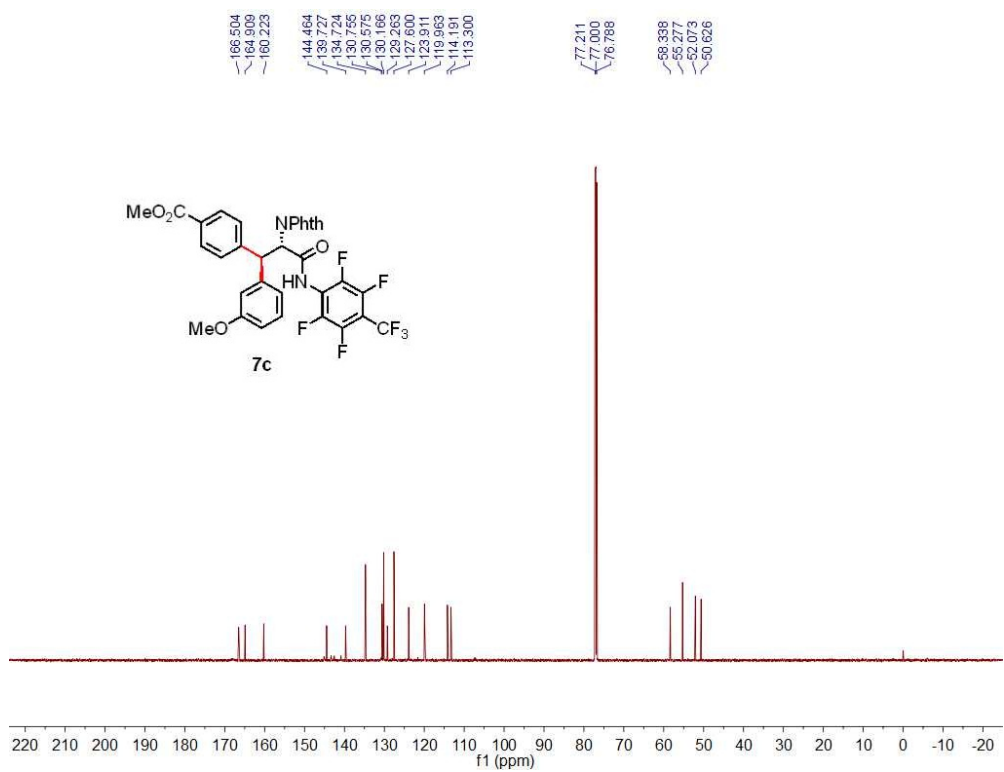

8.415  
7.973  
7.788  
7.781  
7.776  
7.772  
7.767  
7.765  
7.743  
7.740  
7.732  
7.730  
7.727  
7.701  
7.694  
7.689  
7.684  
7.679  
7.672  
7.662  
7.547  
7.545  
7.537  
7.534  
7.532  
7.326  
7.323  
7.317  
7.313  
7.270  
7.261  
7.258  
7.254  
7.153  
7.140  
5.910  
5.888  
5.352  
5.331  
3.841  
-2.259  
-2.211

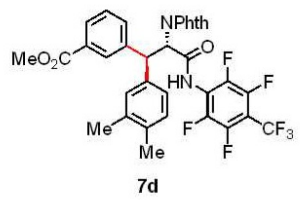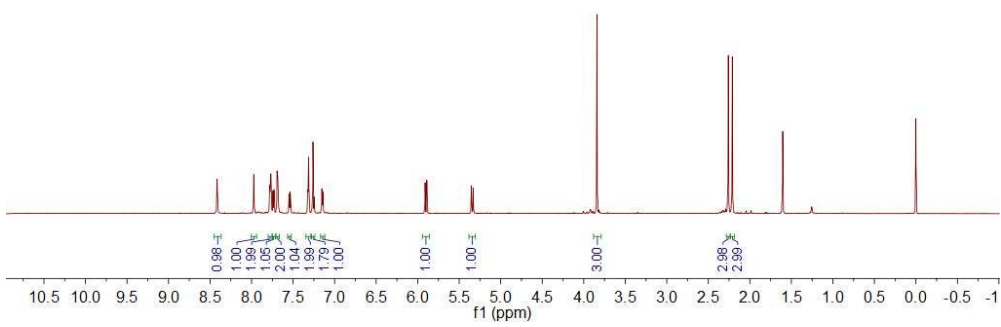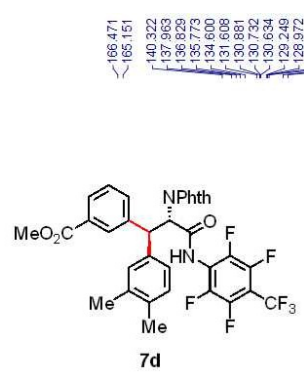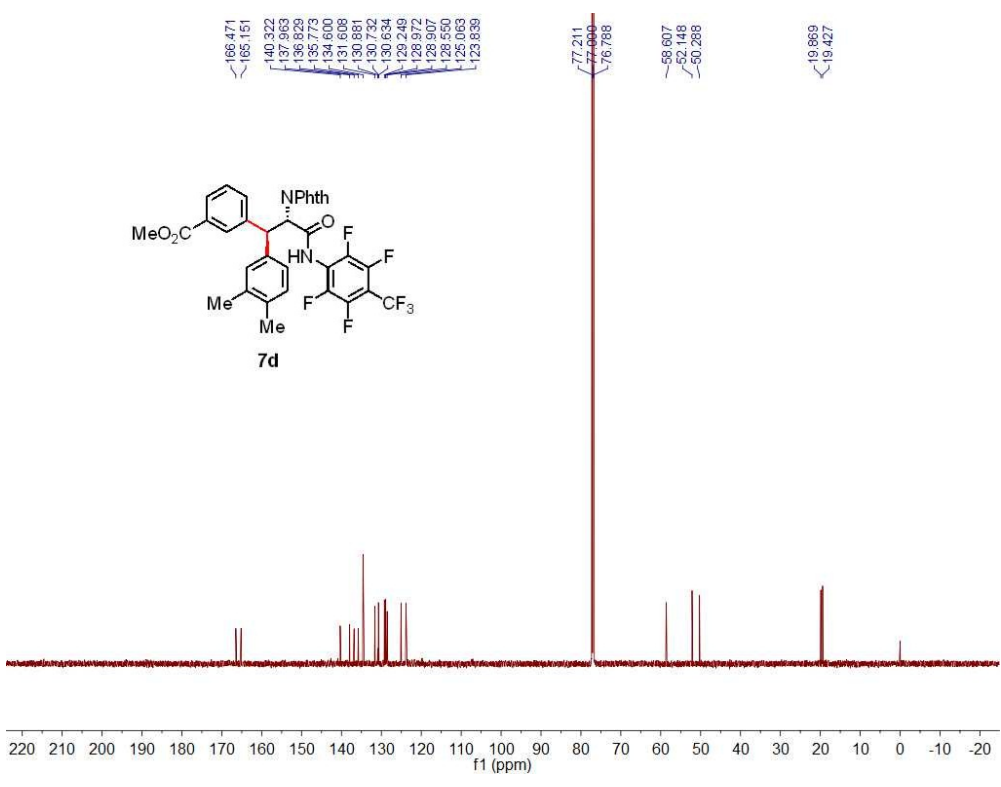

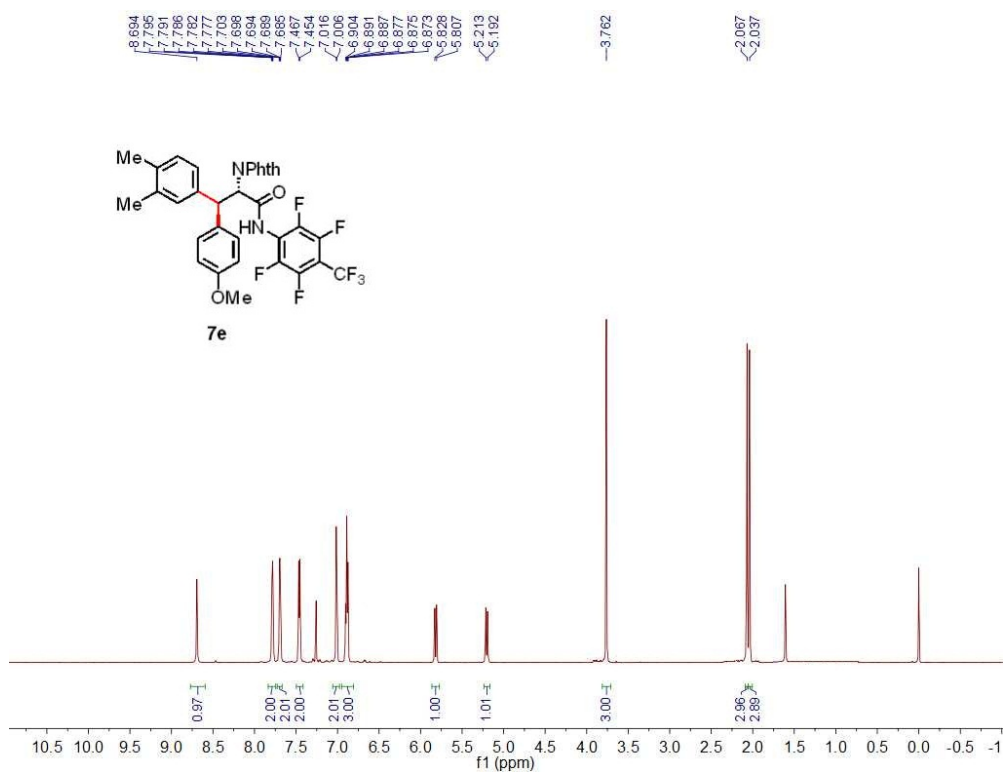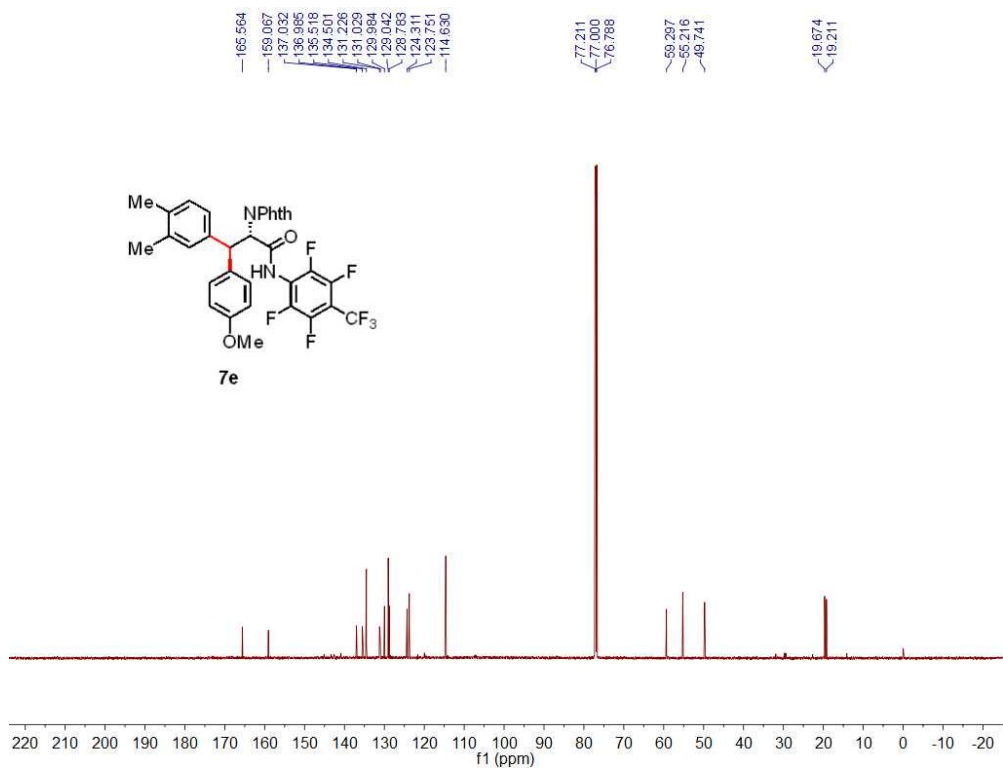

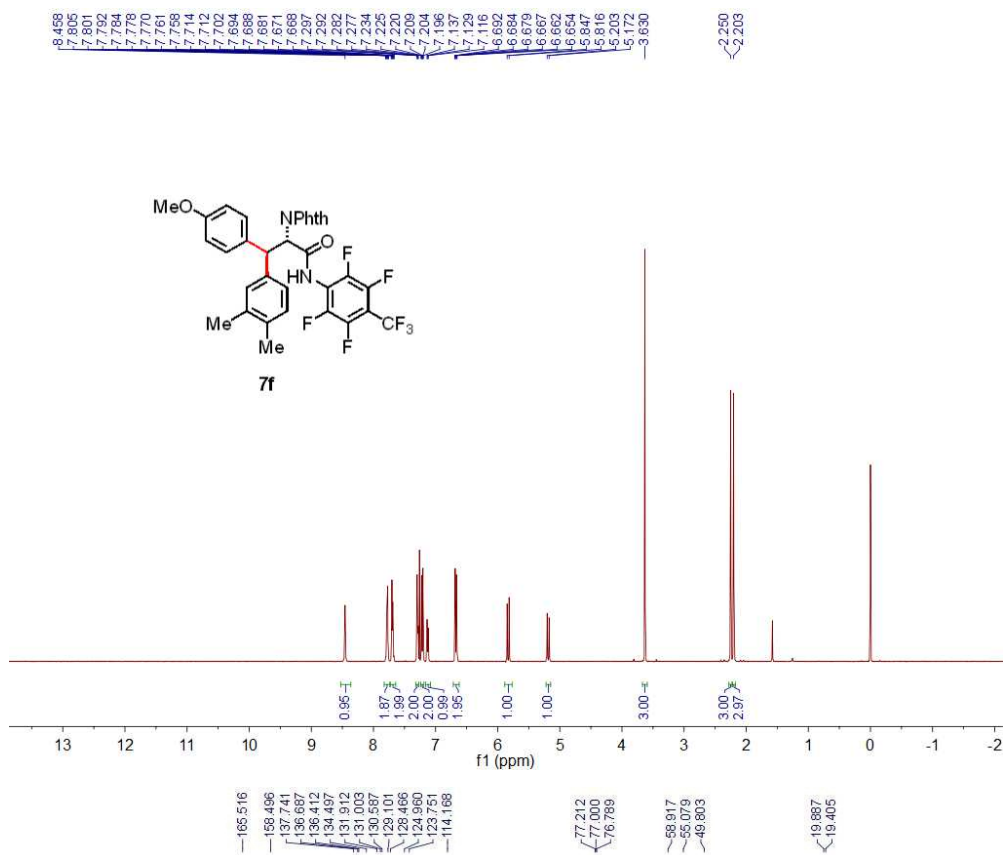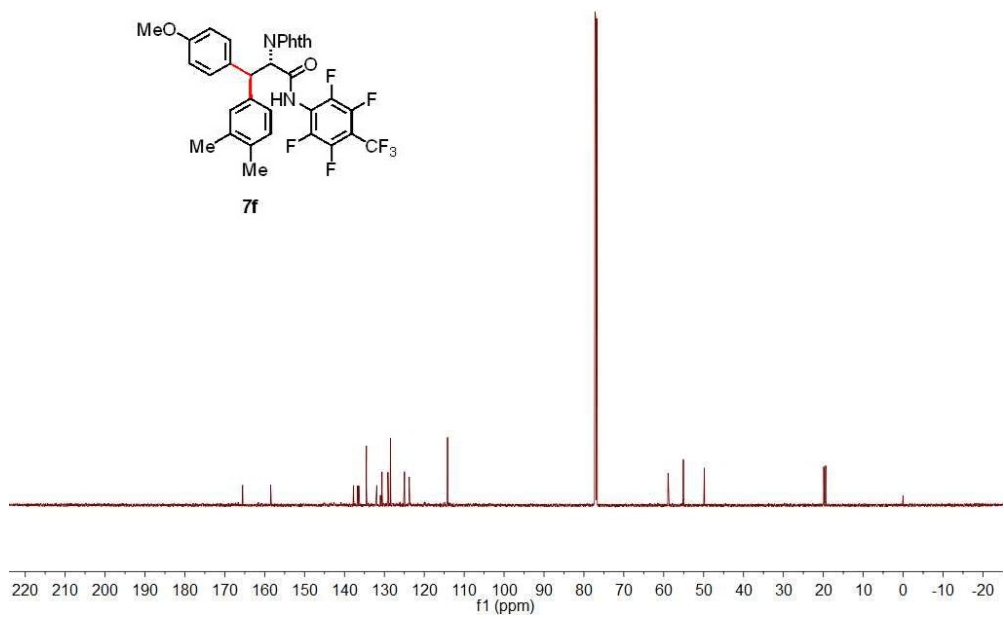



7.909  
7.897  
7.889  
7.884  
7.876  
7.864  
7.852  
7.798  
7.777  
7.769  
7.762  
7.755  
7.747  
7.747  
5.359  
5.355  
5.311  
5.252  
5.226  
5.201  
5.191  
4.789  
4.779  
4.772  
4.764  
4.756  
4.749  
4.741  
4.734  
4.671  
4.663  
4.635  
4.617  
4.593  
4.577  
4.169  
4.092  
4.075  
4.058  
4.040  
3.907  
3.907  
3.907  
2.927  
2.771  
2.628  
2.628  
2.599  
2.589  
2.567  
2.463  
2.408  
1.253  
1.220  
1.203  
1.185

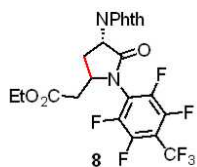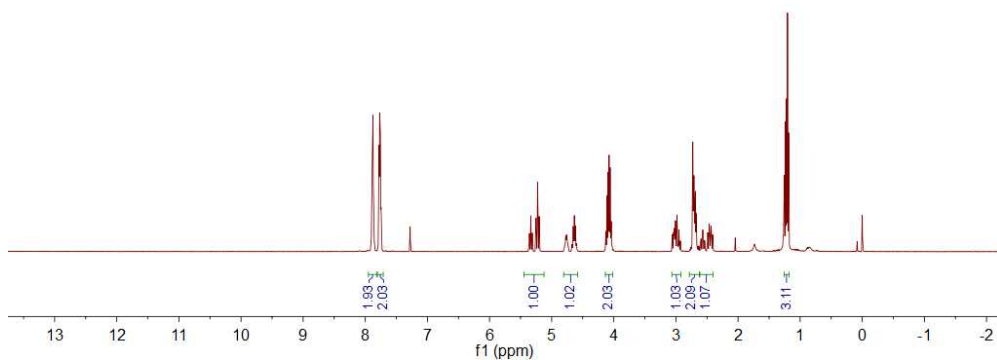

169.373  
169.208  
169.086  
168.942  
167.050  
167.000

134.409  
131.648  
123.661

77.316 CDCl3  
77.000 CDCl3  
76.682 CDCl3

61.219  
54.067  
53.210  
48.605  
47.650

39.174  
38.624  
31.167  
30.310

13.905  
13.885

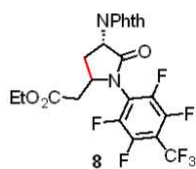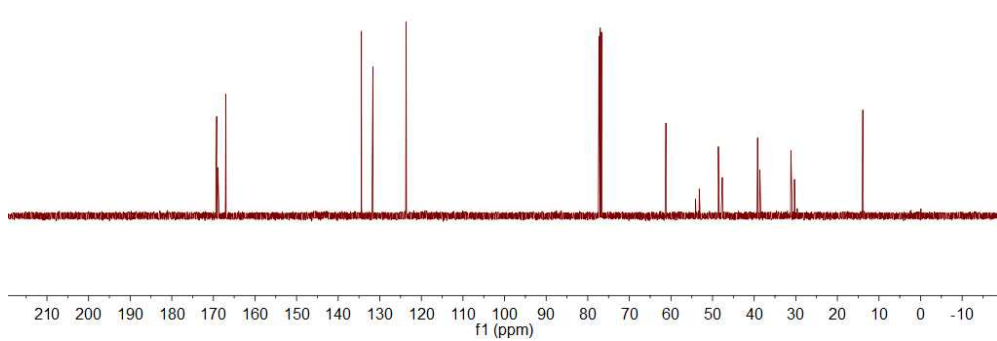

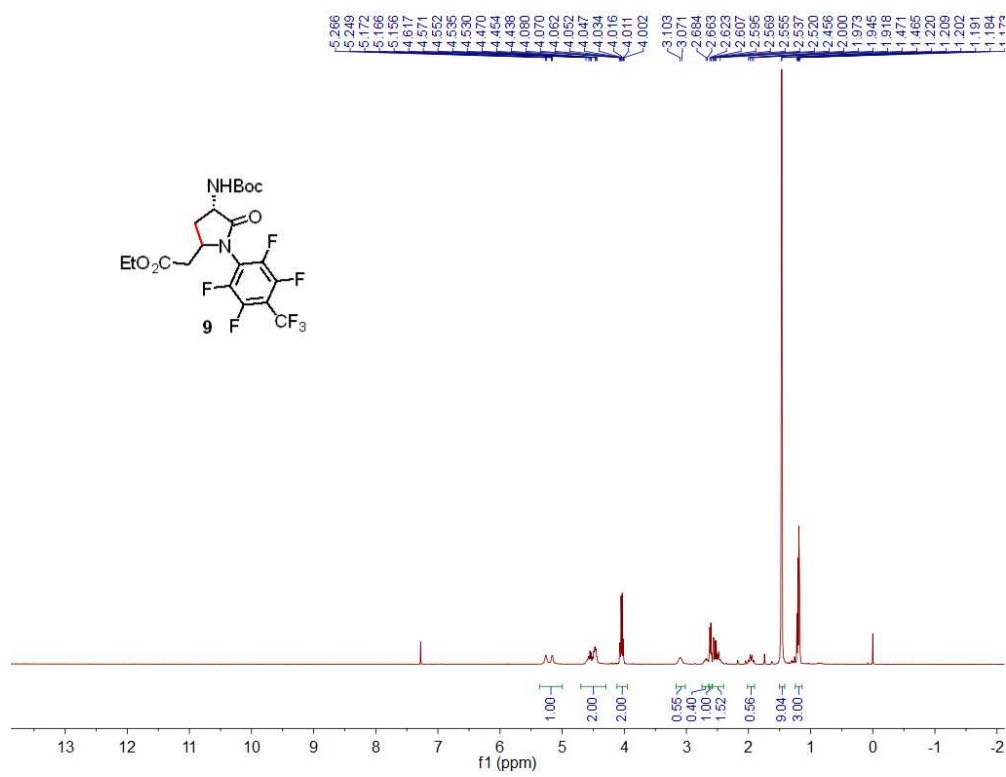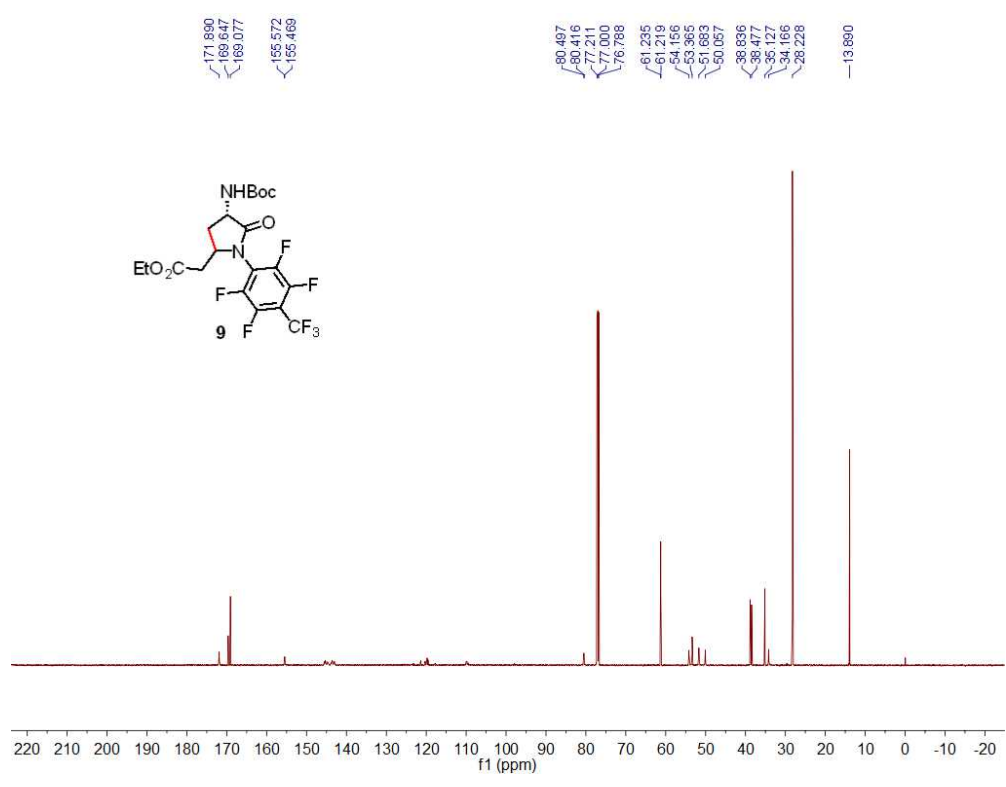

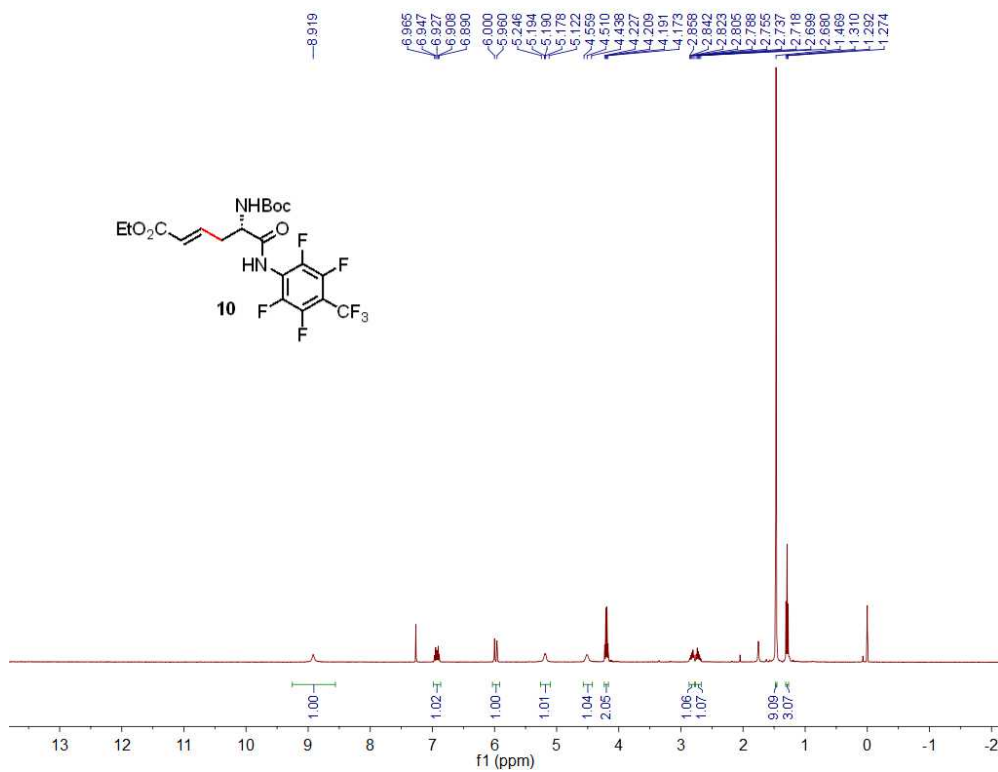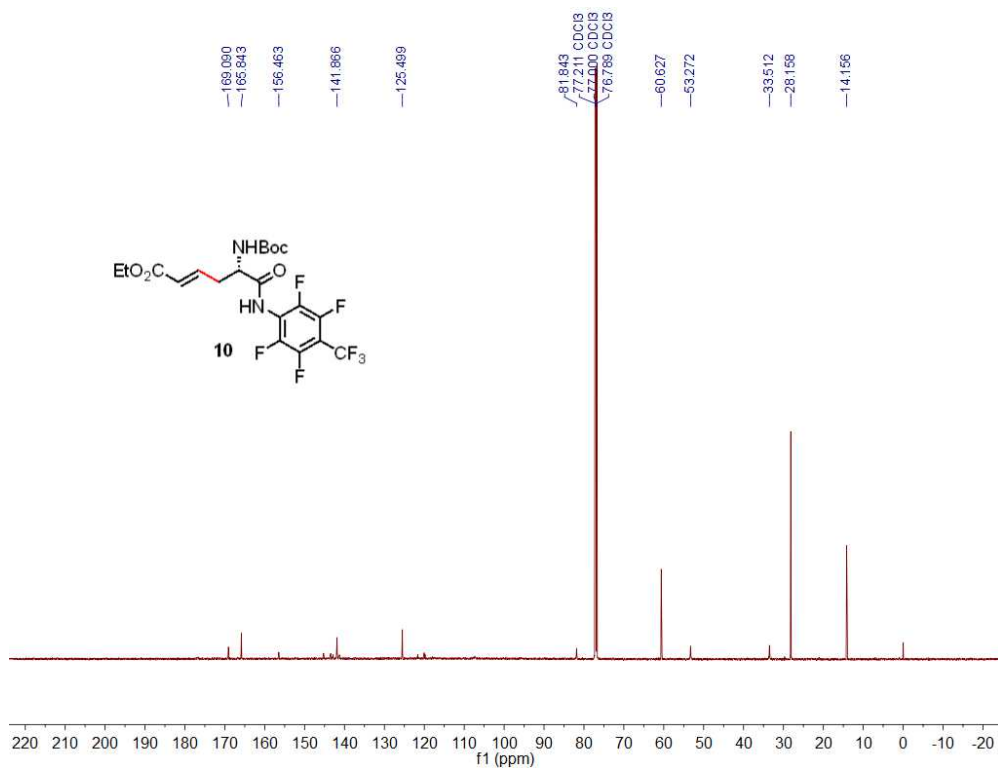

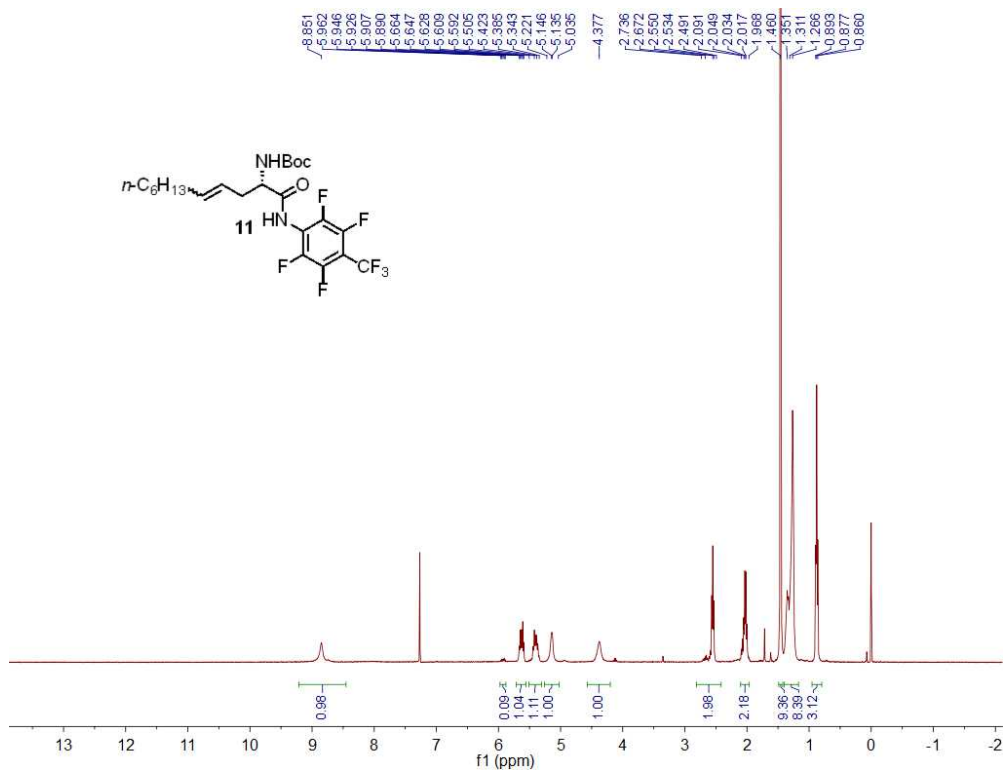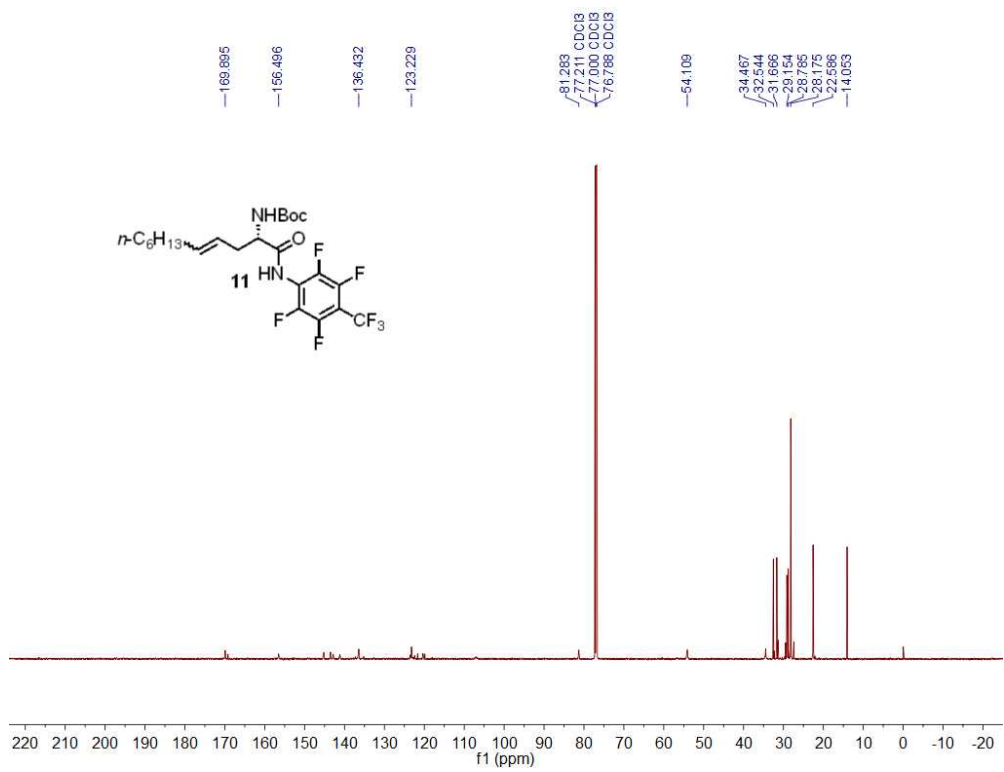

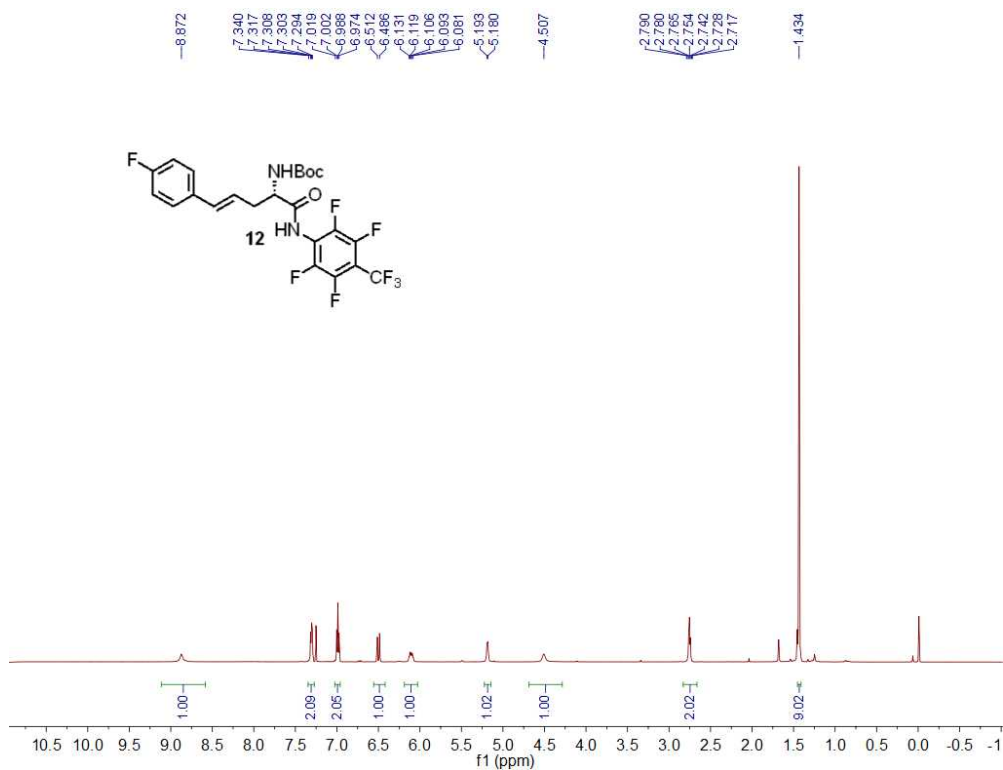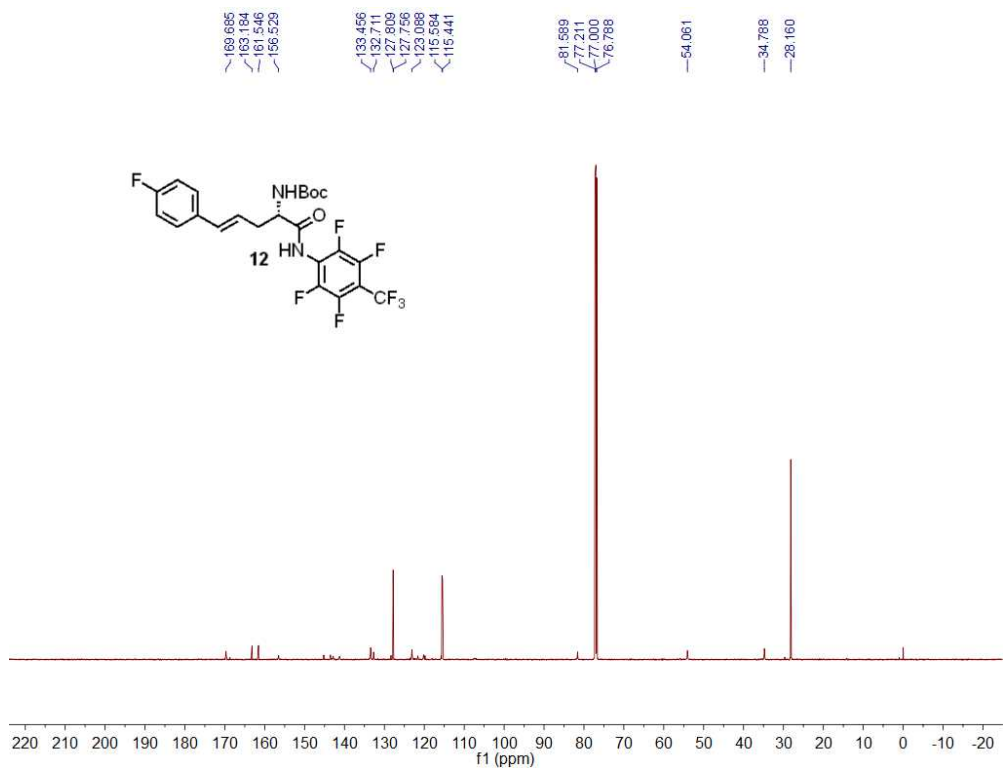

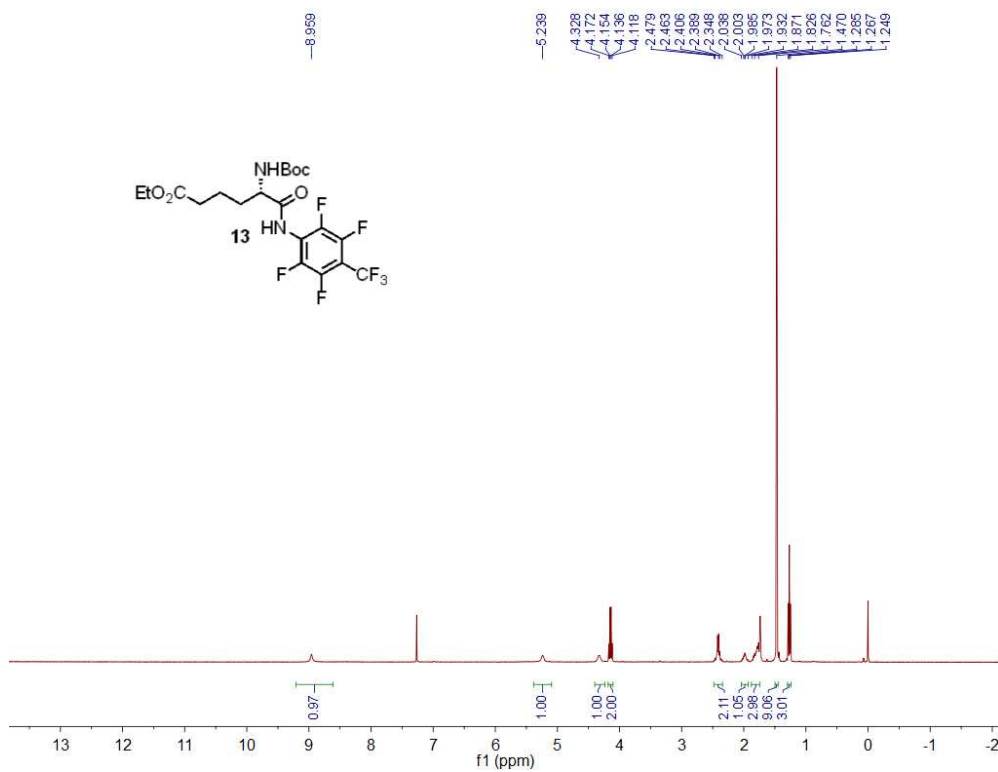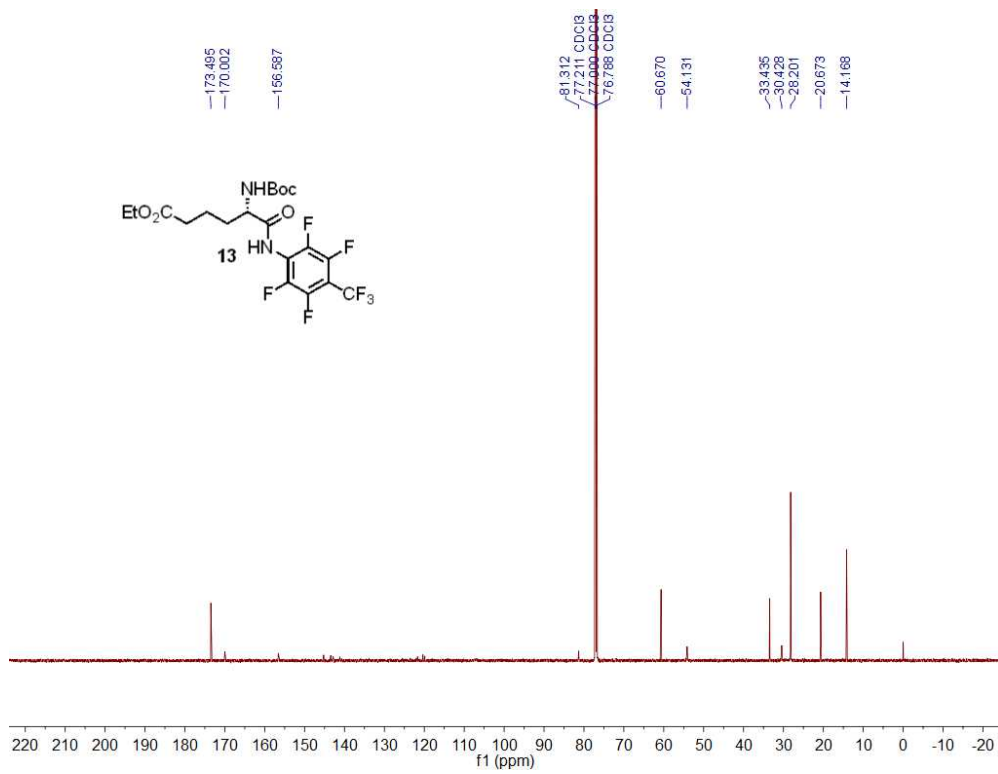

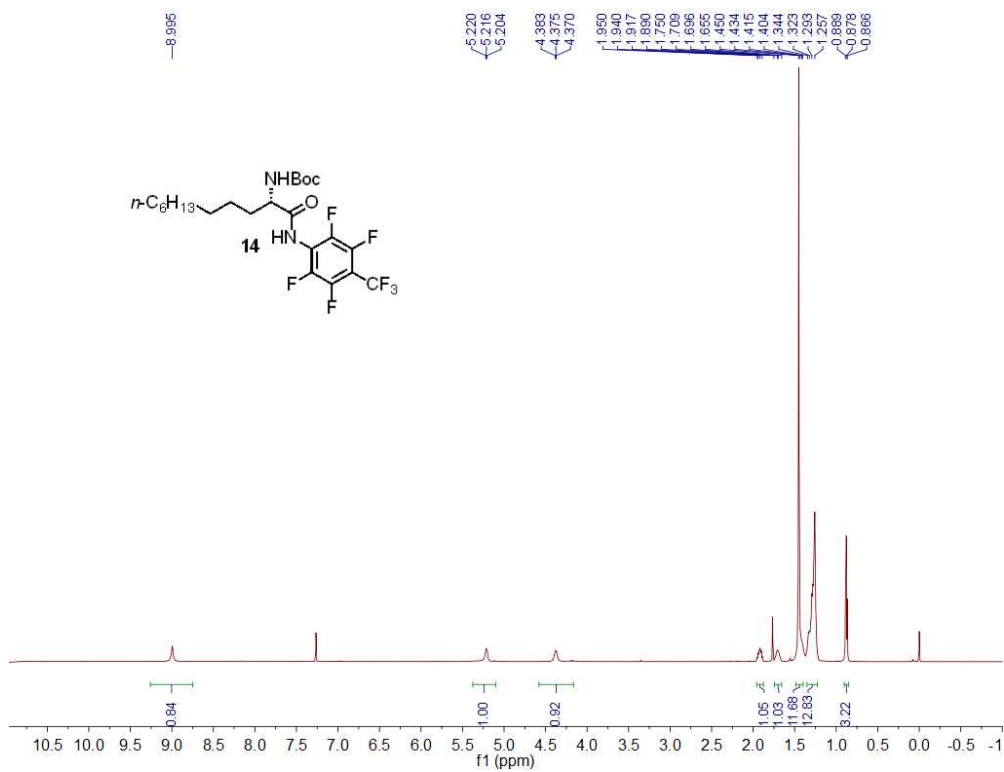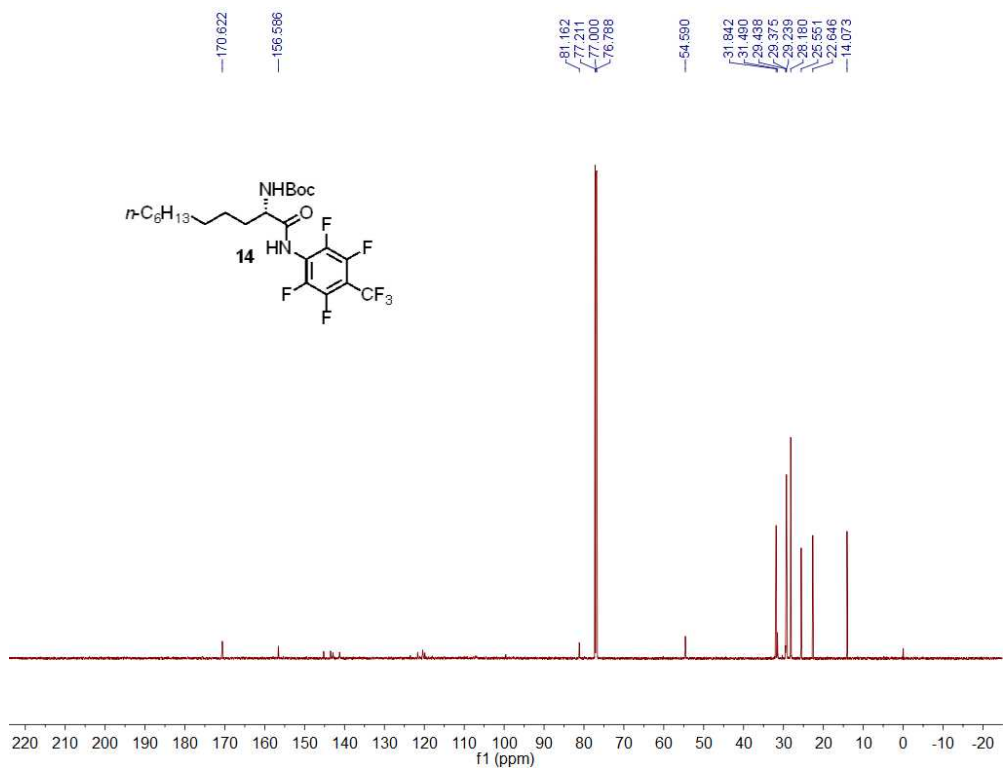

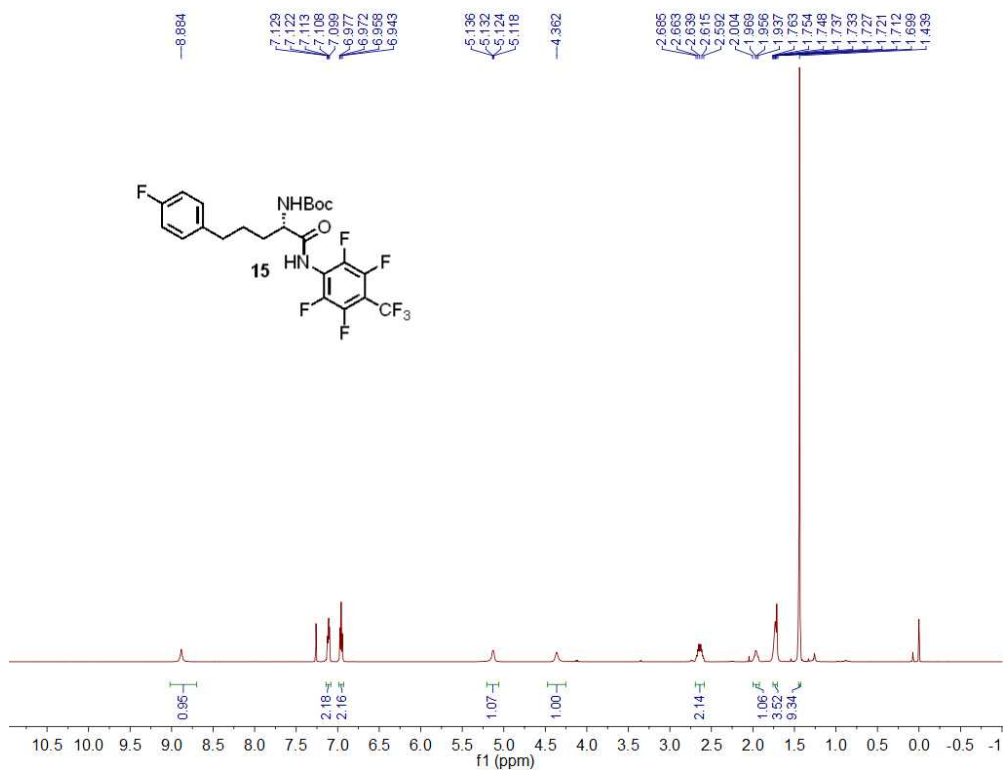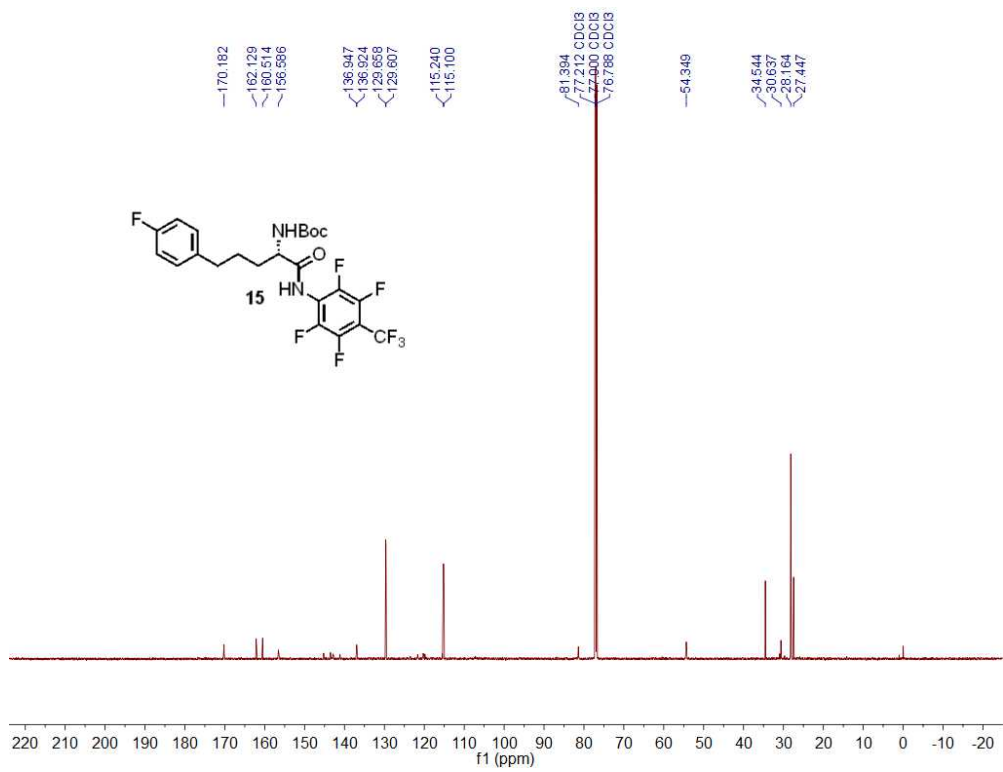



7.131  
7.118  
7.110  
7.104  
7.097  
7.089  
7.083  
-6.661

3.015  
2.994  
2.962  
2.960  
2.819  
2.804  
2.786  
2.771  
2.760  
2.740  
2.724

1.563  
1.337  
1.319

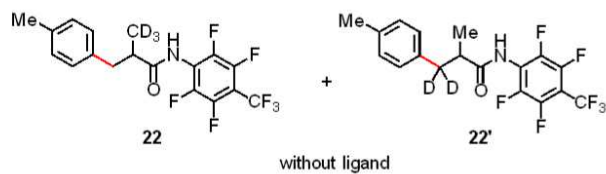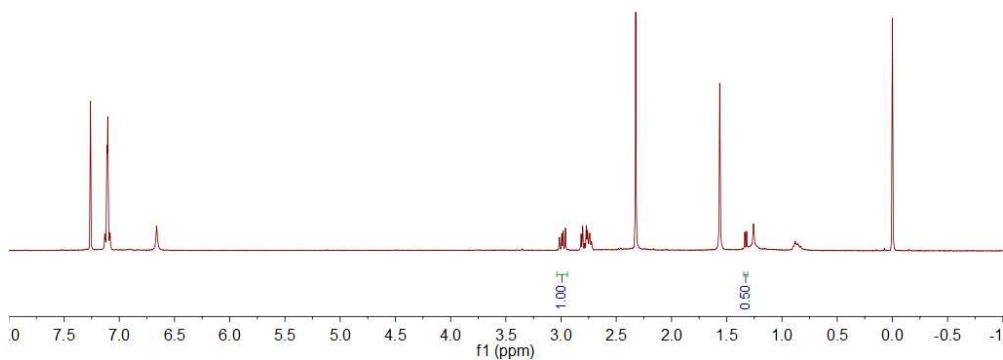

7.130  
7.125  
7.116  
7.109  
7.101  
7.095  
7.081  
-6.668

3.013  
2.992  
2.960  
2.816  
2.801  
2.784  
2.762  
2.727  
2.524

1.334  
1.316

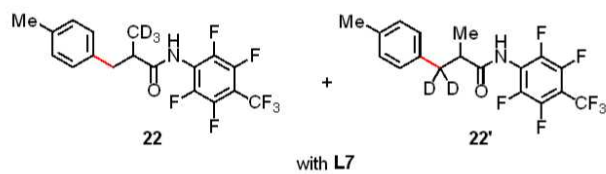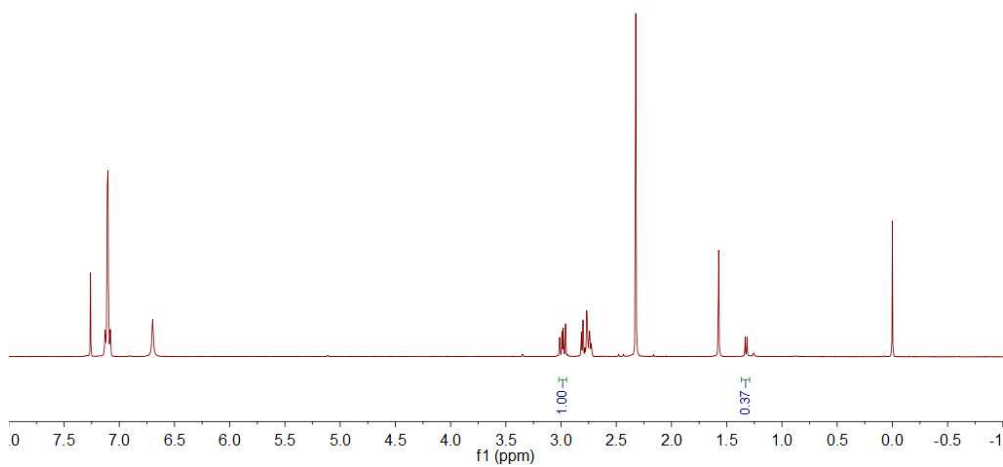

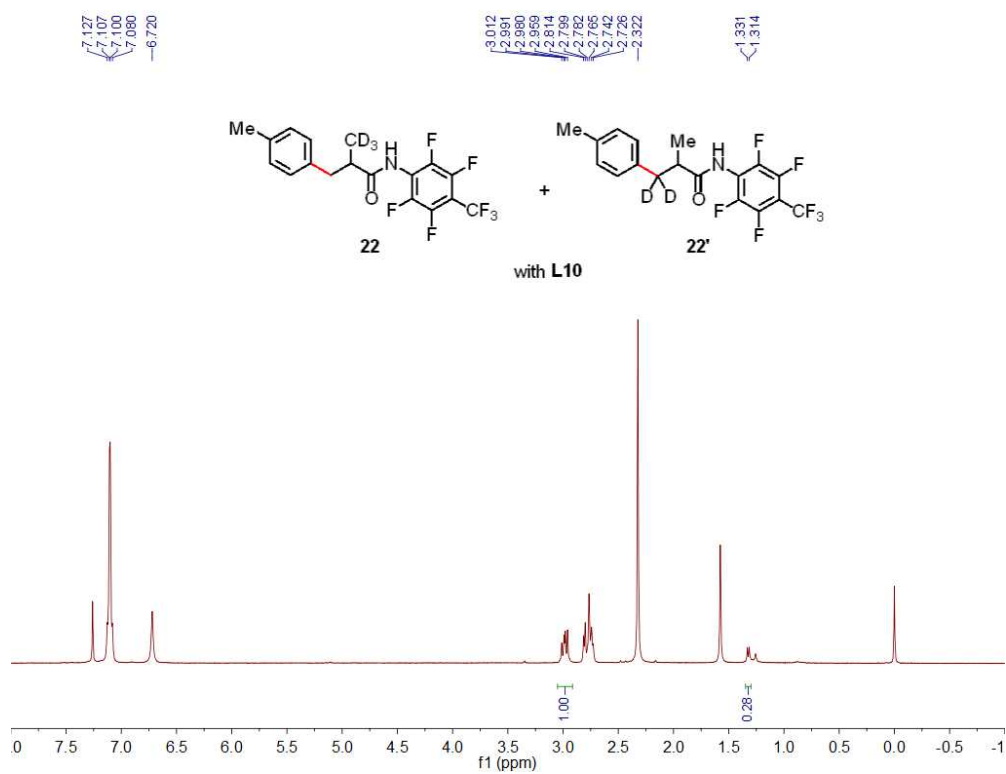

## References and Notes

1. R. Giri, X. Chen, J.-Q. Yu, Palladium-catalyzed asymmetric iodination of unactivated C–H bonds under mild conditions. *Angew. Chem. Int. Ed.* **44**, 2112–2115 (2005). [Medline doi:10.1002/anie.200462884](#)
2. V. G. Zaitsev, D. Shabashov, O. Daugulis, Highly regioselective arylation of  $sp^3$  C–H bonds catalyzed by palladium acetate. *J. Am. Chem. Soc.* **127**, 13154–13155 (2005). [Medline doi:10.1021/ja054549f](#)
3. S.-Y. Zhang, Q. Li, G. He, W. A. Nack, G. Chen, Stereoselective synthesis of  $\beta$ -alkylated  $\alpha$ -amino acids via palladium-catalyzed alkylation of unactivated methylene  $C(sp^3)$ –H bonds with primary alkyl halides. *J. Am. Chem. Soc.* **135**, 12135–12141 (2013). [Medline doi:10.1021/ja406484v](#)
4. D.-H. Wang, M. Wasa, R. Giri, J.-Q. Yu, Pd(II)-catalyzed cross-coupling of  $sp^3$  C–H bonds with  $sp^2$  and  $sp^3$  boronic acids using air as the oxidant. *J. Am. Chem. Soc.* **130**, 7190–7191 (2008). [Medline doi:10.1021/ja801355s](#)
5. M. Wasa, K. M. Engle, J.-Q. Yu, Pd(0)/ $PR_3$ -catalyzed intermolecular arylation of  $sp^3$  C–H bonds. *J. Am. Chem. Soc.* **131**, 9886–9887 (2009). [Medline doi:10.1021/ja903573p](#)
6. B. V. S. Reddy, L. R. Reddy, E. J. Corey, Novel acetoxylation and C–C coupling reactions at unactivated positions in  $\alpha$ -amino acid derivatives. *Org. Lett.* **8**, 3391–3394 (2006). [Medline doi:10.1021/ol061389j](#)
7. L. D. Tran, O. Daugulis, Nonnatural amino acid synthesis by using carbon-hydrogen bond functionalization methodology. *Angew. Chem. Int. Ed.* **51**, 5188–5191 (2012). [Medline doi:10.1002/anie.201200731](#)
8. P. M. T. Ferreira, L. S. Monteiro, G. Pereira, Synthesis of substituted oxazoles from *N*-acyl- $\beta$ -hydroxyamino acid derivatives. *Eur. J. Org. Chem.* **2008**, 4676–4683 (2008). [doi:10.1002/ejoc.200800602](#)
9. R. Noyori, H. Takaya, BINAP: An efficient chiral element for asymmetric catalysis. *Acc. Chem. Res.* **23**, 345–350 (1990). [doi:10.1021/ar00178a005](#)
10. W. Tang, X. Zhang, New chiral phosphorus ligands for enantioselective hydrogenation. *Chem. Rev.* **103**, 3029–3070 (2003). [Medline doi:10.1021/cr020049i](#)
11. S. J. Roseblade, A. Pfaltz, Iridium-catalyzed asymmetric hydrogenation of olefins. *Acc. Chem. Res.* **40**, 1402–1411 (2007). [Medline doi:10.1021/ar700113g](#)
12. N. Rodríguez, J. A. Romero-Revilla, M. Á. Fernández-Ibáñez, J. C. Carretero, Palladium-catalyzed *N*-(2-pyridyl)sulfonyl-directed  $C(sp^3)$ –H  $\gamma$ -arylation of amino acid derivatives. *Chem. Sci.* **4**, 175–179 (2013). [doi:10.1039/c2sc21162a](#)
13. R. Shang, L. Ilies, A. Matsumoto, E. Nakamura,  $\beta$ -Arylation of carboxamides via iron-catalyzed  $C(sp^3)$ –H bond activation. *J. Am. Chem. Soc.* **135**, 6030–6032 (2013). [Medline doi:10.1021/ja402806f](#)
14. E. M. Simmons, J. F. Hartwig, Catalytic functionalization of unactivated primary C–H bonds directed by an alcohol. *Nature* **483**, 70–73 (2012). [Medline doi:10.1038/nature10785](#)

15. W. R. Gutekunst, P. S. Baran, Total synthesis and structural revision of the piperarborenines via sequential cyclobutane C–H arylation. *J. Am. Chem. Soc.* **133**, 19076–19079 (2011). [Medline doi:10.1021/ja209205x](#)
16. N. Hasegawa, V. Charra, S. Inoue, Y. Fukumoto, N. Chatani, Highly regioselective carbonylation of unactivated C(sp<sup>3</sup>)–H bonds by ruthenium carbonyl. *J. Am. Chem. Soc.* **133**, 8070–8073 (2011). [Medline doi:10.1021/ja2001709](#)
17. O. Baudoin, Transition metal-catalyzed arylation of unactivated C(sp<sup>3</sup>)–H bonds. *Chem. Soc. Rev.* **40**, 4902–4911 (2011). [Medline doi:10.1039/c1cs15058h](#)
18. T. W. Lyons, M. S. Sanford, Palladium-catalyzed ligand-directed C–H functionalization reactions. *Chem. Rev.* **110**, 1147–1169 (2010). [Medline doi:10.1021/cr900184e](#)
19. R. Jazzar, J. Hitce, A. Renaudat, J. Sofack-Kreutzer, O. Baudoin, Functionalization of organic molecules by transition-metal-catalyzed C(sp<sup>3</sup>)–H activation. *Chemistry* **16**, 2654–2672 (2010). [Medline doi:10.1002/chem.200902374](#)
20. M. Wasa, K. M. Engle, J.-Q. Yu, Cross-coupling of C(sp<sup>3</sup>)–H bonds with organometallic reagents via Pd(II)/Pd(0) catalysis. *Isr. J. Chem.* **50**, 605–616 (2010). [Medline doi:10.1002/ijch.201000038](#)
21. M. Wasa, K. S. Chan, X. G. Zhang, J. He, M. Miura, J. Q. Yu, Ligand-enabled methylene C(sp<sup>3</sup>)–H bond activation with a Pd(II) catalyst. *J. Am. Chem. Soc.* **134**, 18570–18572 (2012). [Medline doi:10.1021/ja309325e](#)
22. D. Wildemann, F. Erdmann, B. H. Alvarez, G. Stoller, X. Z. Zhou, J. Fanghänel, M. Schutkowski, K. P. Lu, G. Fischer, Nanomolar inhibitors of the peptidyl prolyl cis/trans isomerase Pin1 from combinatorial peptide libraries. *J. Med. Chem.* **49**, 2147–2150 (2006). [Medline doi:10.1021/jm060036n](#)
23. L. Wang, W. Lu, Preparation of unsymmetrical biaryls by Pd(II)-catalyzed cross-coupling of aryl iodides. *Org. Lett.* **11**, 1079–1082 (2009). [Medline doi:10.1021/ol802865c](#)
24. Small amounts of unreacted monoarylated products (15 to 25%) from the first step are also isolated as a by-product of this transformation.
25. M. J. Burk, J. G. Allen, W. F. Kiesman, Highly regio- and enantioselective catalytic hydrogenation of enamides in conjugated diene systems: Synthesis and application of  $\gamma,\delta$ -unsaturated amino acids. *J. Am. Chem. Soc.* **120**, 657–663 (1998). [doi:10.1021/ja9731074](#)
26. X. Chen, K. M. Engle, D.-H. Wang, J.-Q. Yu, Palladium(II)-catalyzed C–H activation/C–C cross-coupling reactions: Versatility and practicality. *Angew. Chem. Int. Ed.* **48**, 5094–5115 (2009). [Medline doi:10.1002/anie.200806273](#)
27. Q. Zhang, Z. Zhang, Z. Yan, Q. Liu, T. Wang, A new efficient synthesis of pyranoquinolines from 1-acetyl *N*-aryl cyclopentanecarboxamides. *Org. Lett.* **9**, 3651–3653 (2007). [Medline doi:10.1021/ol701536q](#)
28. H. V. Le, L. Fan, B. Ganem, A practical and inexpensive “convertible” isonitrile for use in multicomponent reactions. *Tetrahedron Lett.* **52**, 2209–2211 (2011). [doi:10.1016/j.tetlet.2010.11.156](#)

29. Y. Fu, B. Xu, X. Zou, C. Ma, X. Yang, K. Mou, G. Fu, Y. Lü, P. Xu, Design and synthesis of a novel class of furan-based molecules as potential 20S proteasome inhibitors. *Bioorg. Med. Chem. Lett.* **17**, 1102–1106 (2007). [Medline doi:10.1016/j.bmcl.2006.11.020](#)
30. D. Uraguchi, N. Kinoshita, T. Ooi, Catalytic asymmetric protonation of  $\alpha$ -amino acid-derived ketene disilyl acetals using *P*-spiro diaminodioxaphosphonium barfates as chiral proton. *J. Am. Chem. Soc.* **132**, 12240–12242 (2010). [Medline doi:10.1021/ja105945z](#)
31. A. G. Myers, J. L. Gleason, T. Yoon, A practical method for the synthesis of D- or L- $\alpha$ -amino acids by the alkylation of (+)- or (-)-pseudoephedrine glycinamide. *J. Am. Chem. Soc.* **117**, 8488–8489 (1995). [doi:10.1021/ja00137a034](#)
